# Supplementary material for: t-BuOLi promoted regioselective N-thiolation of indoles with N-arylthio phthalimide
Source: Royal Society of Chemistry journal article supplement (doi:10.1039/d4ob00682h), 2024-01-01

## Supporting Information

### ***t*-BuOLi promoted regioselective *N*-thiolation of indoles with *N*-arylthio phthalimide**

Zhitian Huang, Hong Wei, Qianyu Huang, Jiayi Wang, Gonghua Song\*

Shanghai Key Laboratory of Chemical Biology, School of Pharmacy, East China University of Science and Technology, Shanghai 200237, China

E-mail: [ghsong@ecust.edu.cn](mailto:ghsong@ecust.edu.cn);

Fax: +86-21-64252603; Tel: +86-21-64253140

### Table of Contents

|                                                                                  |   |
|----------------------------------------------------------------------------------|---|
| General information and materials.....                                           | 2 |
| General procedure for product synthesis.....                                     | 2 |
| Characterization of product <b>3</b> .....                                       | 2 |
| Copies of <sup>1</sup> H, <sup>13</sup> C NMR spectrum of product <b>3</b> ..... | 9 |

### General information and materials:

All commercially available reagents and solvents were used without further purification unless otherwise stated. Nuclear Magnetic Resonance spectra were recorded on a Bruker 400 UltraShield spectrometer (400 MHz for  $^1\text{H}$  and 101 MHz for  $^{13}\text{C}$ ) in chloroform- $d$  or DMSO- $d_6$ . Data are reported as follows: chemical shifts ( $\delta$ ) reported in parts per million (ppm), multiplicity, coupling constants (J) reported in Hertz (Hz) and integration. Analytical thin-layer chromatography (TLC) was carried out on precoated plates (silica gel 60 F254), and spots were visualized under ultraviolet light. Gas chromatography (GC) was performed on Agilent 7890A. Gas chromatography-mass spectrometry (GC-MS) was performed on Agilent 7890A/5975C. High-resolution mass spectra (HR-MS) were recorded under electron impact (EI-TOF) (70 eV) condition using a MicroMass GCT CA 055 instrument.

### General procedure for product synthesis:

A mixture of indole 1 (0.3 mmol), N-phenylthiophthalimide 2 (0.33 mmol), t-BuOLi (0.3 mmol), and acetonitrile (1.5 mL) was added into a 5.0 mL glass tube and was stirred at room temperature for 1 h. When the reaction was complete, the reaction mixture was quenched with water and the resulting mixture was extracted three times with ethyl acetate. The combined organic layer was washed two times with a little amount of water, dried over anhydrous magnesium sulfate, and filtered. The filtrate was evaporated under vacuum and the residue was purified by flash column chromatography on silica gel (eluting with petroleum ether–ethyl acetate) to provide the desired product 3.

### Characterization of product 3

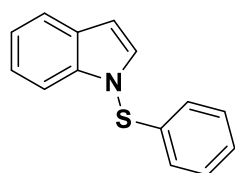

1-(Phenylthio)-1*H*-indole (3a): 64.2 mg (95%), white solid; m.p. 43.3 – 44.6 °C;  $^1\text{H}$  NMR (400 MHz,  $\text{CDCl}_3$ )  $\delta$  7.61 (t,  $J = 7.8$  Hz, 2H), 7.29 – 7.15 (m, 5H), 7.14 – 7.07 (m, 1H), 6.92 – 6.88 (m, 2H), 6.65 (d,  $J = 3.2$  Hz, 1H) ppm;  $^{13}\text{C}$  NMR (101 MHz,  $\text{CDCl}_3$ )  $\delta$  140.3, 139.0, 134.3, 129.6, 129.3, 126.8, 123.9, 123.3, 121.3, 121.2, 111.3, 105.9 ppm; HRMS (EI-TOF) calcd for  $\text{C}_{14}\text{H}_{12}\text{NS}$  [ $\text{M}^+$ ]  $m/z$  225.0612, found 225.0614.

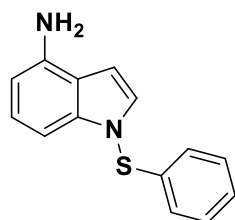

1-(phenylthio)-1*H*-indol-4-amine (3b): 62.0 mg (86%), brown oil;  $^1\text{H}$  NMR (400 MHz, DMSO- $d_6$ )  $\delta$  7.36 – 7.26 (m, 3H), 7.21 (t,  $J = 7.6$  Hz, 1H), 7.00 – 6.90 (m, 3H), 6.88 – 6.84 (m, 1H), 6.75 (d,  $J = 8.0$  Hz, 1H), 6.32 (d,  $J = 7.5$  Hz, 1H), 5.48 (s, 2H) ppm;  $^{13}\text{C}$  NMR (101 MHz, DMSO- $d_6$ )  $\delta$  142.62, 141.36, 139.11, 131.90, 129.86, 127.47, 124.89, 124.51, 117.92, 104.64, 104.40, 99.18 ppm; HRMS (EI-TOF) calcd for  $\text{C}_{14}\text{H}_{12}\text{NS}$  [ $\text{M}^+$ ]  $m/z$  240.0721, found 240.0724.

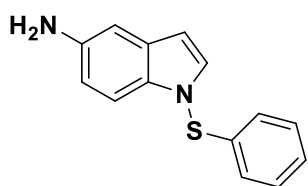

1-(phenylthio)-1*H*-indol-5-amine (3c): 56.9 mg (79%) brown oil;  $^1\text{H}$  NMR (400 MHz,  $\text{DMSO-}d_6$ )  $\delta$  7.38 – 7.30 (m, 3H), 7.29 – 7.21 (m, 1H), 7.07 – 7.01 (m, 2H), 6.93 – 6.83 (m, 2H), 6.59 (d,  $J = 3.3$  Hz, 1H), 6.48 (dd,  $J = 6.5, 2.2$  Hz, 1H), 5.49 (s, 2H) ppm;  $^{13}\text{C}$  NMR (101 MHz,  $\text{DMSO-}d_6$ )  $\delta$  143.98, 139.39, 135.01, 133.03, 130.77, 129.86, 127.44, 124.40, 113.49, 111.38, 105.41, 104.57 ppm; HRMS (EI-TOF) calcd for  $\text{C}_{14}\text{H}_{12}\text{NS}$  [ $\text{M}^+$ ]  $m/z$  240.0721, found 240.0724.

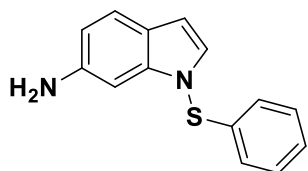

1-(phenylthio)-1*H*-indol-6-amine (3d): 49.7 mg (69%), pale yellow oil;  $^1\text{H}$  NMR (400 MHz,  $\text{DMSO-}d_6$ )  $\delta$  7.34 – 7.29 (m, 2H), 7.27 (d,  $J = 8.3$  Hz, 1H), 7.23 – 7.16 (m, 1H), 7.13 (d,  $J = 3.3$  Hz, 1H), 6.93 – 6.88 (m, 1H), 6.71 (s, 1H), 6.53 – 6.48 (m, 2H), 5.04 (s, 2H) ppm;  $^{13}\text{C}$  NMR (101 MHz,  $\text{DMSO-}d_6$ )  $\delta$  146.42, 141.86, 139.35, 131.54, 129.88, 127.17, 123.78, 121.75, 120.50, 111.63, 106.40, 94.88 ppm; HRMS (EI-TOF) calcd for  $\text{C}_{14}\text{H}_{12}\text{NS}$  [ $\text{M}^+$ ]  $m/z$  240.0721, found 240.0724.

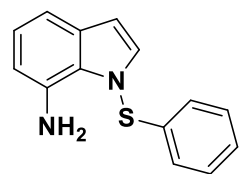

1-(phenylthio)-1*H*-indol-7-amine (3e): 67.4mg (93%) brown oil;  $^1\text{H}$  NMR (400 MHz,  $\text{DMSO-}d_6$ )  $\delta$  7.41 – 7.20 (m, 4H), 7.04 (d,  $J = 7.9$  Hz, 2H), 6.94 – 6.83 (m, 2H), 6.62 – 6.56 (m, 1H), 6.49 (dd,  $J = 6.5, 2.1$  Hz, 1H), 5.49 (s, 2H) ppm;  $^{13}\text{C}$  NMR (101 MHz,  $\text{DMSO-}d_6$ )  $\delta$  139.59, 136.20, 135.50, 131.32, 129.45, 127.50, 125.98, 124.63, 122.52, 109.71, 109.09, 106.68 ppm; HRMS (EI-TOF) calcd for  $\text{C}_{14}\text{H}_{12}\text{NS}$  [ $\text{M}^+$ ]  $m/z$  240.0721, found 240.0724.

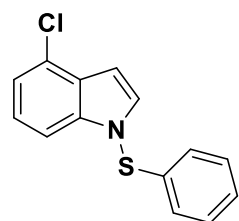

4-chloro-1-(phenylthio)-1*H*-indole (3f): 46.8 mg (60%) colorless oil;  $^1\text{H}$  NMR (400 MHz,  $\text{DMSO-}d_6$ )  $\delta$  7.74 (d,  $J = 3.4$  Hz, 1H), 7.61–7.58 (m, 1H), 7.36 (t,  $J = 7.7$  Hz, 2H), 7.31 – 7.25 (m, 3H), 7.13 – 7.09 (m, 2H), 6.78 (dd,  $J = 3.5, 1.0$  Hz, 1H) ppm;  $^{13}\text{C}$  NMR (101 MHz,  $\text{DMSO-}d_6$ )  $\delta$  140.97, 137.77, 136.60, 130.04 (d,  $J = 8.4$  Hz), 128.33, 127.73, 125.82, 124.58, 121.42, 110.63, 104.05 ppm; HRMS (EI-TOF) calcd for  $\text{C}_{14}\text{H}_{10}\text{ClNS}$  [ $\text{M}^+$ ]  $m/z$  259.0222, found 259.0224.

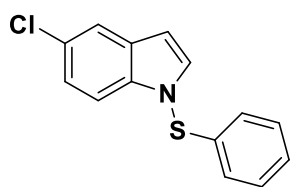

5-chloro-1-(phenylthio)-1*H*-indole (3g): 58.4 mg (75%) white solid; m.p. 43.3 – 44.6 °C;  $^1\text{H}$  NMR (400 MHz,  $\text{DMSO-}d_6$ )  $\delta$  7.71 (d,  $J = 2.1$  Hz, 1H), 7.66 (d,  $J = 3.4$  Hz, 1H), 7.57 (d,  $J = 8.6$  Hz, 1H), 7.33 (dd,  $J = 8.4, 7.0$  Hz, 2H), 7.29 – 7.20 (m, 2H), 7.10 – 7.00 (m, 2H), 6.72 (dd,  $J = 3.3, 0.9$  Hz, 1H) ppm;  $^{13}\text{C}$  NMR (101 MHz,  $\text{DMSO-}d_6$ )  $\delta$  138.64, 137.99, 137.07, 130.99, 130.06, 128.20, 126.42, 125.57, 123.61, 120.92, 112.97, 105.94 ppm; HRMS (EI-TOF) calcd for  $\text{C}_{14}\text{H}_{10}\text{ClNS}$  [ $\text{M}^+$ ]  $m/z$  259.0222, found 259.0224.

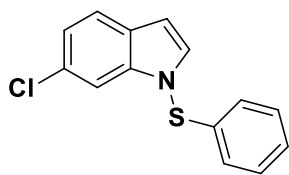

6-chloro-1-(phenylthio)-1*H*-indole (3h): 52.2 mg (67%) colorless oil;  $^1\text{H}$  NMR (400 MHz,  $\text{DMSO-}d_6$ )  $\delta$  7.67 (d,  $J = 8.3$  Hz, 1H), 7.63 (d,  $J = 3.3$  Hz, 1H), 7.60 (s, 1H), 7.37 – 7.31 (m, 2H), 7.28 – 7.23 (m, 1H), 7.20 (dd,  $J = 8.4, 1.9$  Hz, 1H), 7.12 – 7.06 (m, 2H), 6.78 (dd,  $J = 3.3, 0.9$  Hz, 1H) ppm;  $^{13}\text{C}$  NMR (101 MHz,  $\text{DMSO-}d_6$ )  $\delta$  140.68, 137.89, 136.37, 130.07, 128.61, 128.57, 128.21, 127.71, 125.58, 123.11, 122.18, 111.08, 106.40 ppm; HRMS (EI-TOF) calcd for  $\text{C}_{14}\text{H}_{10}\text{ClNS}$  [ $\text{M}^+$ ]  $m/z$  259.0222, found 259.0224.

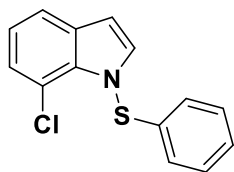

7-chloro-1-(phenylthio)-1*H*-indole (3i): 20.3 mg (26%) colorless oil;  $^1\text{H}$  NMR (400 MHz,  $\text{DMSO-}d_6$ )  $\delta$  7.64 (dd,  $J = 7.8, 1.2$  Hz, 1H), 7.58 (d,  $J = 3.3$  Hz, 1H), 7.38 – 7.32 (m, 2H), 7.29 – 7.21 (m, 2H), 7.16 (t,  $J = 7.7$  Hz, 1H), 7.06 – 6.99 (m, 2H), 6.83 (d,  $J = 3.3$  Hz, 1H) ppm;  $^{13}\text{C}$  NMR (101 MHz,  $\text{DMSO-}d_6$ )  $\delta$  140.13, 139.04, 133.84, 133.17, 129.97, 127.70, 125.51, 124.52, 123.01, 121.06, 117.66, 106.93 ppm; HRMS (EI-TOF) calcd for  $\text{C}_{14}\text{H}_{10}\text{ClNS}$  [ $\text{M}^+$ ]  $m/z$  259.0222, found 259.0224.

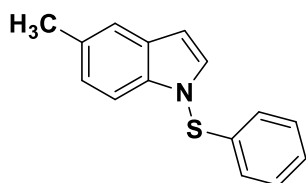

5-methyl-1-(phenylthio)-1*H*-indole (3j): 67.5 mg (94%) white solid; m.p. 66.5 – 68.0 °C;  $^1\text{H}$  NMR (400 MHz,  $\text{DMSO-}d_6$ )  $\delta$  7.48 (d,  $J = 3.3$  Hz, 1H), 7.43 (d,  $J = 9.0$  Hz, 2H), 7.30 (t,  $J = 7.2$  Hz, 2H), 7.20 (t,  $J = 7.5$  Hz, 1H), 7.06 (dd,  $J = 8.3, 1.8$  Hz, 1H), 6.97 (dd,  $J = 8.6, 1.5$  Hz, 2H), 6.64 (dd,  $J = 3.3, 1.0$  Hz, 1H), 2.38 (s, 3H) ppm;  $^{13}\text{C}$  NMR (101 MHz,  $\text{DMSO-}d_6$ )  $\delta$  138.76, 138.37, 135.36, 130.56, 130.00, 129.94, 127.72, 125.13, 124.79, 121.33, 110.99, 105.95, 21.47 ppm; HRMS (EI-TOF) calcd for  $\text{C}_{15}\text{H}_{13}\text{NS}$  [ $\text{M}^+$ ]  $m/z$  239.0769, found 239.0771.

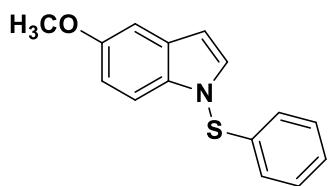

5-methoxy-1-(phenylthio)-1*H*-indole (3k): 75.8 mg (99%) yellow oil;  $^1\text{H}$  NMR (400 MHz,  $\text{DMSO-}d_6$ )  $\delta$  7.50 (d,  $J = 3.3$  Hz, 1H), 7.43 (d,  $J = 8.9$  Hz, 1H), 7.31 (dd,  $J = 8.4, 7.1$  Hz, 2H), 7.25 – 7.18 (m, 1H), 7.15 (d,  $J = 2.4$  Hz, 1H), 7.02 – 6.93 (m, 2H), 6.87 (dd,  $J = 8.9, 2.5$  Hz, 1H), 6.65 (dd,  $J = 3.3, 0.9$  Hz, 1H), 3.76 (s, 3H) ppm;  $^{13}\text{C}$  NMR (101 MHz,  $\text{DMSO-}d_6$ )  $\delta$  155.40, 138.80, 135.95, 134.79, 130.37, 129.95, 127.75, 124.82, 113.25, 112.01, 106.18, 103.68, 55.90 ppm; HRMS (EI-TOF) calcd for  $\text{C}_{15}\text{H}_{13}\text{NOS}$  [ $\text{M}^+$ ]  $m/z$  255.0718, found 255.0721.

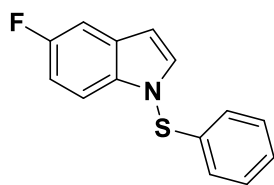

5-fluoro-1-(phenylthio)-1*H*-indole (3l): 64.2 mg (88%) white solid; m.p. 68.0 – 70.0 °C;  $^1\text{H}$  NMR (400 MHz,  $\text{DMSO-}d_6$ )  $\delta$  7.66 (d,  $J = 3.2$  Hz, 1H), 7.56 (q,  $J = 4.4$  Hz, 1H), 7.44 (dd,  $J = 9.5, 2.5$  Hz, 1H), 7.37 – 7.31 (m, 2H), 7.28 – 7.21 (m, 1H), 7.14 – 7.02 (m, 3H), 6.73 (dd,  $J = 3.3, 0.9$  Hz, 1H) ppm;  $^{13}\text{C}$  NMR (101 MHz,  $\text{DMSO-}d_6$ )  $\delta$  158.8 (d,  $J = 235.2$  Hz), 138.2, 137.3, 136.6, 130.3 (d,  $J = 10.4$  Hz), 129.9, 128.1, 125.4, 112.5 (d,  $J = 9.9$  Hz), 111.6 (d,  $J = 26.2$  Hz), 106.6 (d,  $J = 24.1$

Hz), 106.3 (d,  $J = 4.2$  Hz) ppm; HRMS (EI-TOF) calcd for  $C_{14}H_{10}FNS$  [ $M^+$ ]  $m/z$  243.0518, found 243.0520.

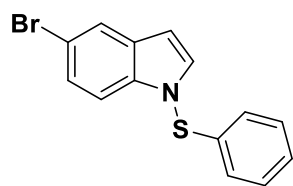

5-bromo-1-(phenylthio)-1*H*-indole (3m): 62.0 mg (68%) white solid; m.p. 55.2 – 57.3 °C;  $^1H$  NMR (400 MHz,  $DMSO-d_6$ )  $\delta$  7.85 (d,  $J = 1.9$  Hz, 1H), 7.64 (d,  $J = 3.3$  Hz, 1H), 7.53 (d,  $J = 8.7$  Hz, 1H), 7.40 – 7.29 (m, 3H), 7.27 – 7.21 (m, 1H), 7.07 – 7.02 (m, 2H), 6.72 (dd,  $J = 3.3, 0.9$  Hz, 1H) ppm;  $^{13}C$  NMR (101 MHz,  $DMSO-d_6$ )  $\delta$  138.91, 137.93, 136.87, 131.63, 130.04, 128.19, 126.18, 125.54, 123.92, 114.34, 113.40, 105.81 ppm; HRMS (EI-TOF) calcd for  $C_{14}H_{10}BrNS$  [ $M^+$ ]  $m/z$  302.9717, found 302.9719.

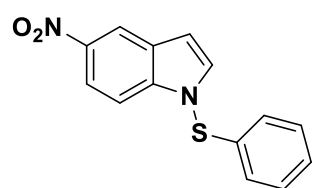

5-nitro-1-(phenylthio)-1*H*-indole (3n): 41.4 mg (51%) pale yellow oil;  $^1H$  NMR (400 MHz,  $DMSO-d_6$ )  $\delta$  8.62 (t,  $J = 1.8$  Hz, 1H), 8.12 (dt,  $J = 9.2, 1.8$  Hz, 1H), 7.88 – 7.81 (m, 1H), 7.78 (d,  $J = 9.0$  Hz, 1H), 7.35 (t,  $J = 7.4$  Hz, 2H), 7.27 (t,  $J = 6.6$  Hz, 1H), 7.16 (d,  $J = 7.9$  Hz, 2H), 6.98 (d,  $J = 3.3$  Hz, 1H) ppm;  $^{13}C$  NMR (101 MHz,  $DMSO-d_6$ )  $\delta$  143.35, 142.98, 138.78, 137.13, 130.17, 129.36, 128.75, 126.51, 118.88, 118.38, 112.17, 108.08 ppm; HRMS (EI-TOF) calcd for  $C_{14}H_{10}N_2O_2S$  [ $M^+$ ]  $m/z$  270.0463, found 270.0465.

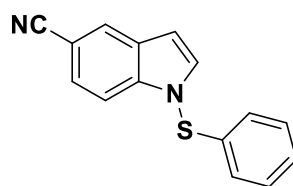

1-(phenylthio)-1*H*-indole-5-carbonitrile (3o): 33.8 mg (45%) white solid; m.p. 61.4 – 62.3 °C;  $^1H$  NMR (400 MHz,  $DMSO-d_6$ )  $\delta$  8.21 (d,  $J = 1.6$  Hz, 1H), 7.83 (d,  $J = 3.3$  Hz, 1H), 7.78 (d,  $J = 8.5$  Hz, 1H), 7.64 (dd,  $J = 8.5, 1.6$  Hz, 1H), 7.37 (t,  $J = 7.5$  Hz, 2H), 7.29 (t,  $J = 7.3$  Hz, 1H), 7.16 (dd,  $J = 7.2, 1.5$  Hz, 2H), 6.89 (dd,  $J = 3.4, 0.9$  Hz, 1H) ppm;  $^{13}C$  NMR (101 MHz,  $DMSO-d_6$ )  $\delta$  142.01, 137.82, 137.29, 130.12, 129.69, 128.59, 127.03, 126.57, 126.30, 120.44, 112.74, 106.72, 104.15 ppm; HRMS (EI-TOF) calcd for  $C_{15}H_{10}N_2S$  [ $M^+$ ]  $m/z$  250.0565, found 250.0567.

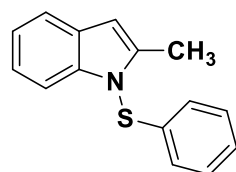

2-methyl-1-(phenylthio)-1*H*-indole (3p): 66.0 mg (92%) white solid; m.p. 47.5 – 49.9 °C;  $^1H$  NMR (400 MHz,  $DMSO-d_6$ )  $\delta$  7.54 (d,  $J = 7.5$  Hz, 1H), 7.49 (d,  $J = 7.8$  Hz, 1H), 7.35 – 7.28 (m, 2H), 7.25 – 7.10 (m, 3H), 6.87 (d,  $J = 8.3$  Hz, 2H), 6.58 (d,  $J = 1.6$  Hz, 1H), 2.43 (s, 3H) ppm;  $^{13}C$  NMR (101 MHz,  $DMSO-d_6$ )  $\delta$  141.32, 140.77, 138.82, 130.04, 129.50, 127.32, 123.79, 122.68, 121.90, 120.51, 111.16, 104.33, 13.12 ppm; HRMS (EI-TOF) calcd for  $C_{15}H_{13}NS$  [ $M^+$ ]  $m/z$  239.0769, found 239.0771.

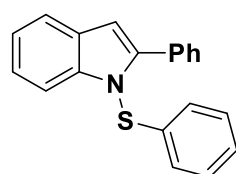

2-phenyl-1-(phenylthio)-1*H*-indole (3r): 70.0 mg (77%) yellow oil;  $^1H$  NMR (400 MHz,  $DMSO-d_6$ )  $\delta$  7.67 (d,  $J = 6.9$  Hz, 1H), 7.63 – 7.58 (m, 3H), 7.47 – 7.39 (m, 3H), 7.30 – 7.18 (m, 4H), 7.14 – 7.08 (m, 1H), 6.95 (s, 1H), 6.77 (d,  $J = 7.6$  Hz, 2H) ppm;  $^{13}C$  NMR (101 MHz,  $DMSO-d_6$ )  $\delta$  144.86, 141.95, 138.95, 131.70, 129.9, 129.8,

129.56, 128.9, 128.8, 127.21, 123.97, 123.64, 122.56, 121.42, 112.21, 106.55 ppm; HRMS (EI-TOF) calcd for C<sub>20</sub>H<sub>15</sub>NS [M<sup>+</sup>] *m/z* 301.0925, found 301.0928.

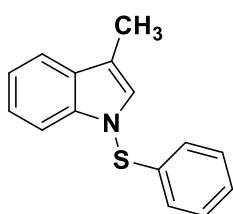

3-methyl-1-(phenylthio)-1*H*-indole (3s): 46.7 mg (65%) colorless oil; <sup>1</sup>H NMR (400 MHz, DMSO-*d*<sub>6</sub>) δ 7.58 (d, *J* = 7.8 Hz, 1H), 7.51 (d, *J* = 8.1 Hz, 1H), 7.33 – 7.13 (m, 6H), 6.98 (dd, *J* = 8.3, 1.3 Hz, 2H), 2.27 (s, 3H) ppm; <sup>13</sup>C NMR (101 MHz, DMSO-*d*<sub>6</sub>) δ 139.87, 138.39, 131.50, 129.88, 129.38, 127.13, 124.28, 123.13, 120.72, 119.19, 114.30, 110.62, 9.39 ppm; HRMS (EI-TOF) calcd for C<sub>15</sub>H<sub>13</sub>NS [M<sup>+</sup>] *m/z* 239.0769, found 239.0771.

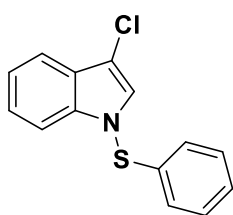

3-chloro-1-(phenylthio)-1*H*-indole (3t): 44.4 mg (57%) colorless oil; <sup>1</sup>H NMR (400 MHz, DMSO-*d*<sub>6</sub>) δ 7.87 (s, 1H), 7.68 – 7.63 (m, 1H), 7.59 (dt, *J* = 7.8, 0.9 Hz, 1H), 7.39 – 7.24 (m, 5H), 7.18 – 7.13 (m, 2H) ppm; <sup>13</sup>C NMR (101 MHz, DMSO-*d*<sub>6</sub>) δ 139.39, 137.61, 131.55, 130.06, 128.50, 127.00, 126.28, 125.00, 122.56, 118.60, 111.96, 108.00 ppm; HRMS (EI-TOF) calcd for C<sub>14</sub>H<sub>10</sub>ClNS [M<sup>+</sup>] *m/z* 259.0222, found 259.0224.

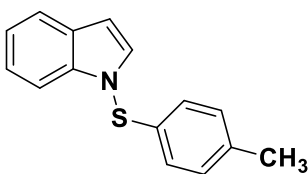

1-(*p*-tolylthio)-1*H*-indole (3u): 62.4 mg (87%) white solid; m.p. 62.0 – 64.5 °C; <sup>1</sup>H NMR (400 MHz, DMSO-*d*<sub>6</sub>) δ 7.61 (t, *J* = 8.7 Hz, 2H), 7.56 (d, *J* = 3.3 Hz, 1H), 7.25 (t, *J* = 7.7 Hz, 1H), 7.18–7.11 (m, 3H), 7.07 (d, *J* = 8.0 Hz, 2H), 6.70 (d, *J* = 3.3 Hz, 1H), 2.23 (s, 3H) ppm; <sup>13</sup>C NMR (101 MHz, DMSO-*d*<sub>6</sub>) δ 140.00, 138.25, 135.27, 134.55, 130.55, 129.73, 126.96, 123.50, 121.57, 111.36, 106.01, 21.08 ppm; HRMS (EI-TOF) calcd for C<sub>15</sub>H<sub>13</sub>NS [M<sup>+</sup>] *m/z* 239.0769, found 239.0771.

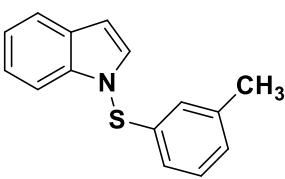

1-(*m*-tolylthio)-1*H*-indole (3u'): 64.6 mg (90%) white solid; m.p. 72.0 – 74.0 °C; <sup>1</sup>H NMR (400 MHz, DMSO-*d*<sub>6</sub>) δ 7.66 – 7.61 (m, 1H), 7.59 – 7.53 (m, 2H), 7.28 – 7.23 (m, 1H), 7.22 – 7.13 (m, 2H), 7.04 (d, *J* = 7.5 Hz, 1H), 6.95 (s, 1H), 6.76 (d, *J* = 7.9 Hz, 1H), 6.73 (dd, *J* = 3.3, 0.9 Hz, 1H), 2.21 (s, 3H) ppm; <sup>13</sup>C NMR (101 MHz, DMSO-*d*<sub>6</sub>) δ 140.06, 139.48, 138.27, 135.37, 129.87, 129.72, 128.76, 125.67, 123.61, 122.48, 121.67, 121.61, 111.31, 106.20, 21.41 ppm; HRMS (EI-TOF) calcd for C<sub>15</sub>H<sub>13</sub>NS [M<sup>+</sup>] *m/z* 239.0769, found 239.0771.

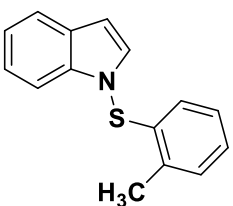

1-(*o*-tolylthio)-1*H*-indole (3u''): 58.1 mg (81%) white solid; m.p. 67.0 – 68.8 °C; <sup>1</sup>H NMR (400 MHz, DMSO-*d*<sub>6</sub>) δ 7.66 (d, *J* = 7.7 Hz, 1H), 7.55 – 7.47 (m, 2H), 7.27 – 7.22 (m, 2H), 7.17 (t, *J* = 7.4 Hz, 1H), 7.09 (t, *J* = 7.4 Hz, 1H), 7.01 (t, *J* = 7.7 Hz, 1H), 6.78 (d, *J* = 3.3 Hz, 1H), 6.15 (d, *J* = 8.0 Hz, 1H), 2.38 (s, 3H) ppm; <sup>13</sup>C NMR (101 MHz, DMSO-*d*<sub>6</sub>) δ 140.00, 137.69, 135.27, 132.98, 131.07, 129.80, 127.49, 127.13, 123.70, 123.24, 121.78, 121.70, 111.29, 106.55, 19.00

ppm; HRMS (EI-TOF) calcd for C<sub>15</sub>H<sub>13</sub>NS [M<sup>+</sup>] *m/z* 239.0769, found 239.0771.

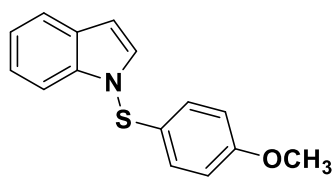

1-((4-methoxyphenyl)thio)-1*H*-indole (3v): (78%) white solid; m.p. 58.0 – 60.0 °C; <sup>1</sup>H NMR (400 MHz, DMSO-*d*<sub>6</sub>) δ 7.70 (d, *J* = 8.2 Hz, 1H), 7.61 – 7.54 (m, 2H), 7.43 (d, *J* = 8.8 Hz, 2H), 7.25 (t, *J* = 7.7 Hz, 1H), 7.12 (t, *J* = 7.5 Hz, 1H), 6.92 (d, *J* = 8.9 Hz, 2H), 6.62 (d, *J* = 3.3 Hz, 1H), 3.70 (s, 3H) ppm; <sup>13</sup>C NMR (101 MHz, DMSO-*d*<sub>6</sub>) δ 160.66, 139.87, 135.06, 132.39, 129.70, 127.74, 123.32, 121.42 (d, *J* = 10.8 Hz), 115.52, 111.51, 105.62, 55.85 ppm; HRMS (EI-TOF) calcd for C<sub>15</sub>H<sub>13</sub>NOS [M<sup>+</sup>] *m/z* 255.0718, found 255.0721.

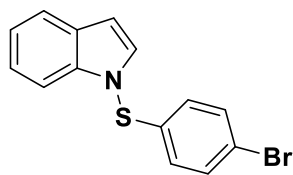

1-((4-bromophenyl)thio)-1*H*-indole (3w): 68.4 mg (75%) white solid; m.p. 96.0 – 97.5 °C; <sup>1</sup>H NMR (400 MHz, DMSO-*d*<sub>6</sub>) δ 7.65 (d, *J* = 7.8 Hz, 1H), 7.57 – 7.48 (m, 4H), 7.29 – 7.22 (m, 1H), 7.20 – 7.14 (m, 1H), 6.93 (d, *J* = 8.6 Hz, 2H), 6.75 (d, *J* = 3.3 Hz, 1H) ppm; <sup>13</sup>C NMR (101 MHz, DMSO-*d*<sub>6</sub>) δ 139.86, 138.25, 135.15, 132.82, 129.80, 126.85, 123.80, 121.89, 121.72, 120.77, 111.22, 106.61 ppm; HRMS (EI-TOF) calcd for C<sub>14</sub>H<sub>10</sub>BrNS [M<sup>+</sup>] *m/z* 302.9717, found 302.9719.

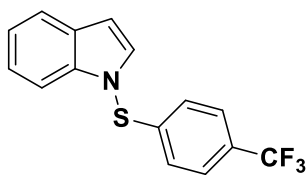

1-((4-(trifluoromethyl)phenyl)thio)-1*H*-indole (3x): 63.4 mg (72%) white solid; m.p. 85.0 – 87.0 °C; <sup>1</sup>H NMR (400 MHz, DMSO-*d*<sub>6</sub>) δ 7.67 (t, *J* = 7.9 Hz, 3H), 7.58 – 7.55 (m, 1H), 7.51 (d, *J* = 8.1 Hz, 1H), 7.27 (t, *J* = 7.2 Hz, 1H), 7.20 (t, *J* = 7.4 Hz, 1H), 7.01 (d, *J* = 8.2 Hz, 2H), 6.82 (d, *J* = 3.2 Hz, 1H) ppm; <sup>13</sup>C NMR (101 MHz, DMSO-*d*<sub>6</sub>) δ 144.98, 139.77, 135.03, 129.83, 127.44 (q, *J* = 31.3 Hz), 126.81 (q, *J* = 3.6 Hz), 124.50 (q, *J* = 272.7 Hz), 123.95, 123.42, 122.06, 121.79, 111.09, 107.01 ppm; HRMS (EI-TOF) calcd for C<sub>15</sub>H<sub>10</sub>F<sub>3</sub>NS [M<sup>+</sup>] *m/z* 293.0486, found 293.0490.

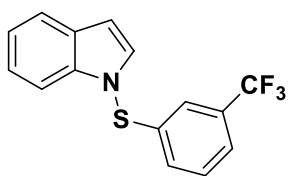

1-((3-(trifluoromethyl)phenyl)thio)-1*H*-indole (3x'): 66.9 mg (76%) white solid; m.p. 81.5 – 83.0 °C; <sup>1</sup>H NMR (400 MHz, DMSO-*d*<sub>6</sub>) δ 7.67 (d, *J* = 7.7 Hz, 1H), 7.59 (d, *J* = 3.4 Hz, 1H), 7.57 – 7.49 (m, 3H), 7.36 (s, 1H), 7.26 (t, *J* = 7.6 Hz, 1H), 7.19 (t, *J* = 7.4 Hz, 1H), 7.10 (d, *J* = 7.5 Hz, 1H), 6.80 (d, *J* = 3.3 Hz, 1H) ppm; <sup>13</sup>C NMR (101 MHz, DMSO-*d*<sub>6</sub>) δ 141.01, 139.81, 135.10, 131.08, 130.6 (q, *J* = 32.3 Hz), 129.82, 127.90, 124.16 (q, *J* = 273.7 Hz), 124.11 (q, *J* = 4.0 Hz), 123.9, 122.02, 121.77, 120.52 (q, *J* = 4.0 Hz), 111.14, 106.91 ppm; HRMS (EI-TOF) calcd for C<sub>15</sub>H<sub>10</sub>F<sub>3</sub>NS [M<sup>+</sup>] *m/z* 293.0486, found 293.0490.

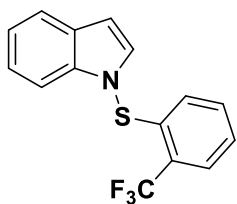

1-((2-(trifluoromethyl)phenyl)thio)-1*H*-indole (3x''): 57.2 mg (65%) white solid; m.p. 75.8 – 77.0 °C; <sup>1</sup>H NMR (400 MHz, CDCl<sub>3</sub>) δ 7.75 – 7.67 (m, 2H), 7.61 (d, *J* = 8.0 Hz, 1H), 7.38 – 7.20 (m, 5H), 6.80 (d, *J* = 4.0 Hz, 1H), 6.34 (d, *J* = 4.0 Hz, 1H) ppm; <sup>13</sup>C NMR (101 MHz, CDCl<sub>3</sub>) δ 140.00, 139.43, 134.09, 132.65, 129.84, 126.94 (q, *J* = 5.0 Hz), 126.02, 124.52 (q, *J* = 32.3 Hz), 124.10 (q, *J* = 274.7 Hz), 123.93, 123.73, 121.85, 121.39, 111.27, 106.92 ppm; HRMS (EI-TOF) calcd for C<sub>15</sub>H<sub>10</sub>F<sub>3</sub>NS [M<sup>+</sup>] *m/z* 293.0486, found 293.0490.

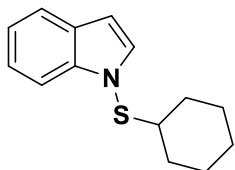

1-(cyclohexylthio)-1*H*-indole (3z): 52.7 mg (76%) colorless oil; <sup>1</sup>H NMR (400 MHz, DMSO-*d*<sub>6</sub>) δ 7.61 (dd, *J* = 11.0, 8.0 Hz, 2H), 7.35 (d, *J* = 3.3 Hz, 1H), 7.27 (t, *J* = 7.0 Hz, 1H), 7.13 (t, *J* = 7.4 Hz, 1H), 6.61 (d, *J* = 3.3 Hz, 1H), 3.17 (ddq, *J* = 10.7, 7.5, 3.6 Hz, 1H), 1.87 – 1.75 (m, 2H), 1.74 – 1.63 (m, 2H), 1.58 – 1.49 (m, 1H), 1.32 – 1.18 (m, 4H), 1.16 – 1.04 (m, 1H) ppm; <sup>13</sup>C NMR (101 MHz, DMSO-*d*<sub>6</sub>) δ 141.17, 136.47, 129.40, 123.03, 121.25, 121.03, 111.64, 104.76, 50.72, 31.53, 25.58, 25.49 ppm; MS (GC-MS): *m/z* 231.1 (M<sup>+</sup>).

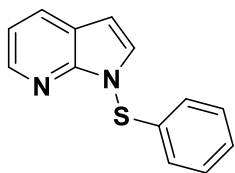

1-(phenylthio)-1*H*-pyrrolo[2,3-*b*]pyridine (3ac): 39.0 mg (57%) white solid; m.p. 112.5 – 114.0 °C; <sup>1</sup>H NMR (400 MHz, DMSO-*d*<sub>6</sub>) δ 8.35 (d, *J* = 4.7 Hz, 1H), 8.08 (d, *J* = 7.8 Hz, 1H), 7.71 (d, *J* = 3.7 Hz, 1H), 7.37 – 7.18 (m, 4H), 7.04 (d, *J* = 7.8 Hz, 2H), 6.77 (d, *J* = 3.7 Hz, 1H) ppm; <sup>13</sup>C NMR (101 MHz, DMSO-*d*<sub>6</sub>) δ 150.33, 144.51, 138.82, 135.71, 130.04, 129.86, 127.75, 125.22, 121.70, 118.14, 104.57 ppm; HRMS (EI-TOF) calcd for C<sub>13</sub>H<sub>10</sub>N<sub>2</sub>S [M<sup>+</sup>] *m/z* 226.0565, found 226.0568.

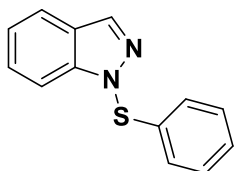

1-(phenylthio)-1*H*-indazole (3ad): 54.5 mg (80%) white solid; m.p. 93.3 – 95.7 °C; <sup>1</sup>H NMR (400 MHz, DMSO-*d*<sub>6</sub>) δ 8.44 (d, *J* = 3.4 Hz, 1H), 7.86 (dd, *J* = 8.0, 3.2 Hz, 1H), 7.70 (dd, *J* = 8.4, 3.2 Hz, 1H), 7.48 – 7.57 (m, 1H), 7.20 – 7.37 (m, 4H), 7.11 (dd, *J* = 8.0, 3.2 Hz, 2H) ppm; <sup>13</sup>C NMR (101 MHz, DMSO-*d*<sub>6</sub>) δ 145.02, 139.74, 137.71, 130.02, 128.71, 128.50, 126.38, 125.31, 122.96, 122.17, 111.00 ppm; HRMS (EI-TOF) calcd for C<sub>13</sub>H<sub>10</sub>N<sub>2</sub>S [M<sup>+</sup>] *m/z* 226.0565, found 226.0567.



# Copies of $^1\text{H}$ , $^{13}\text{C}$ NMR spectrum of products

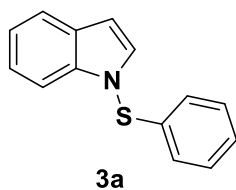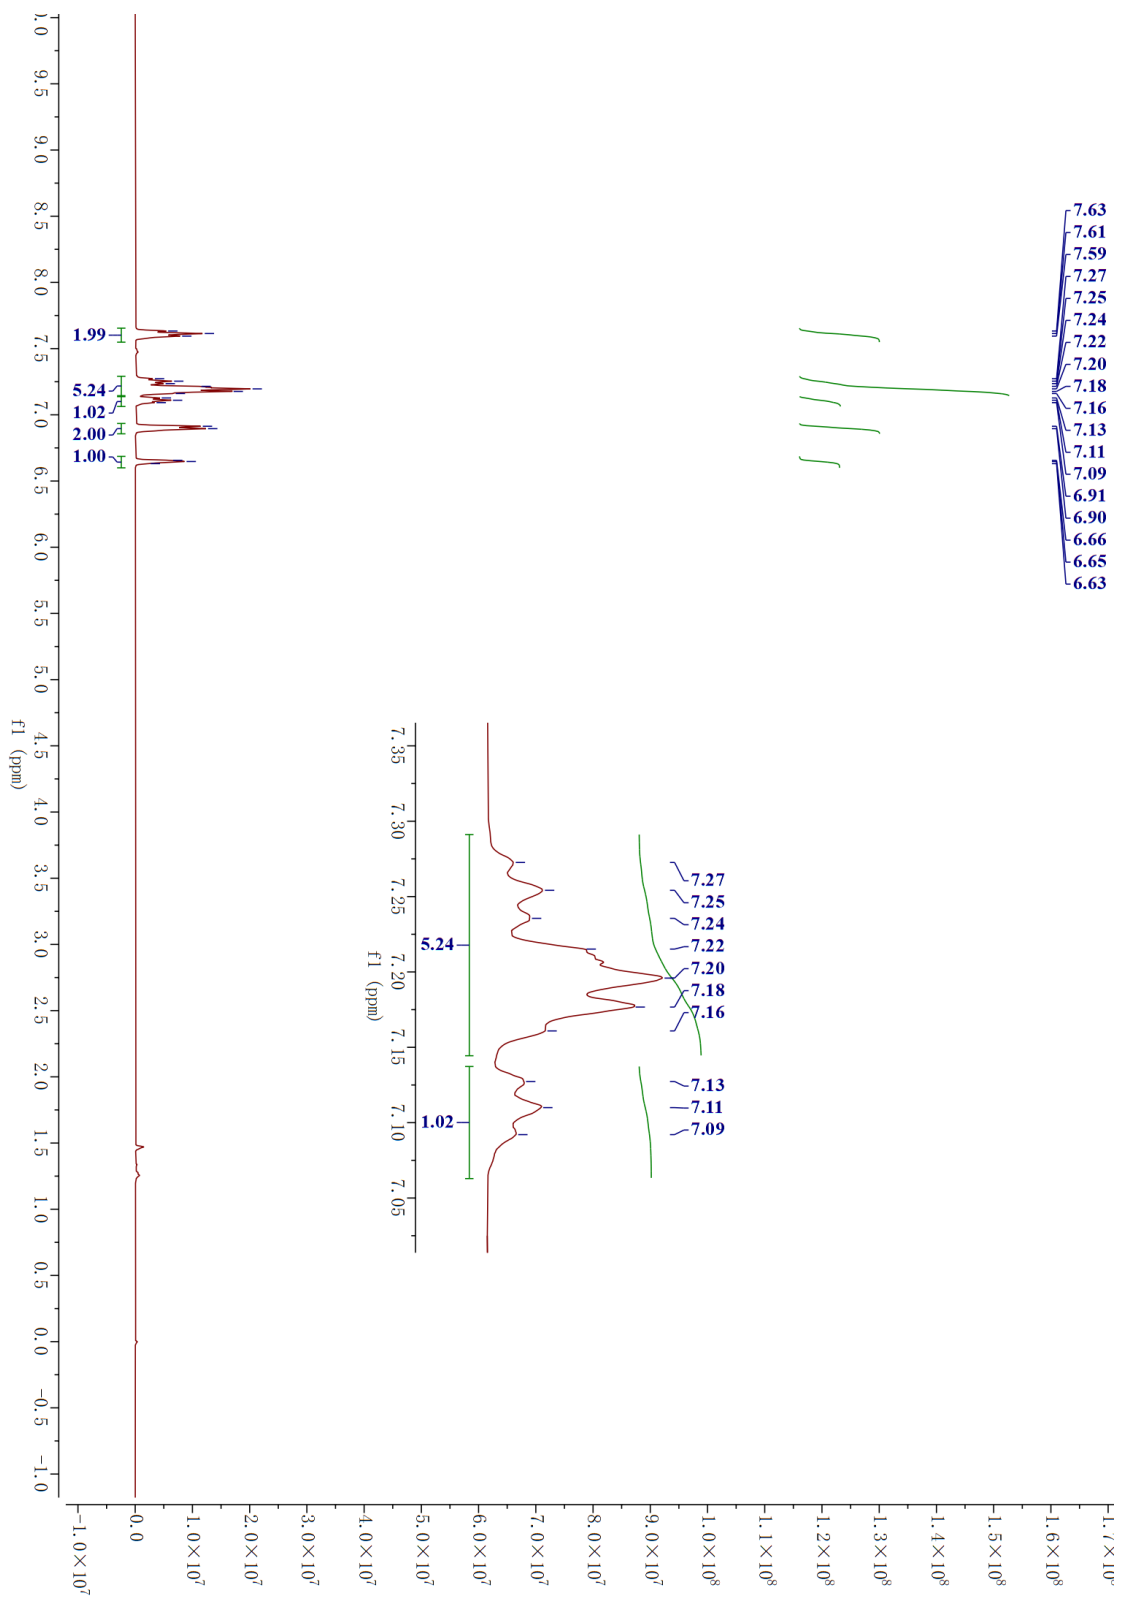

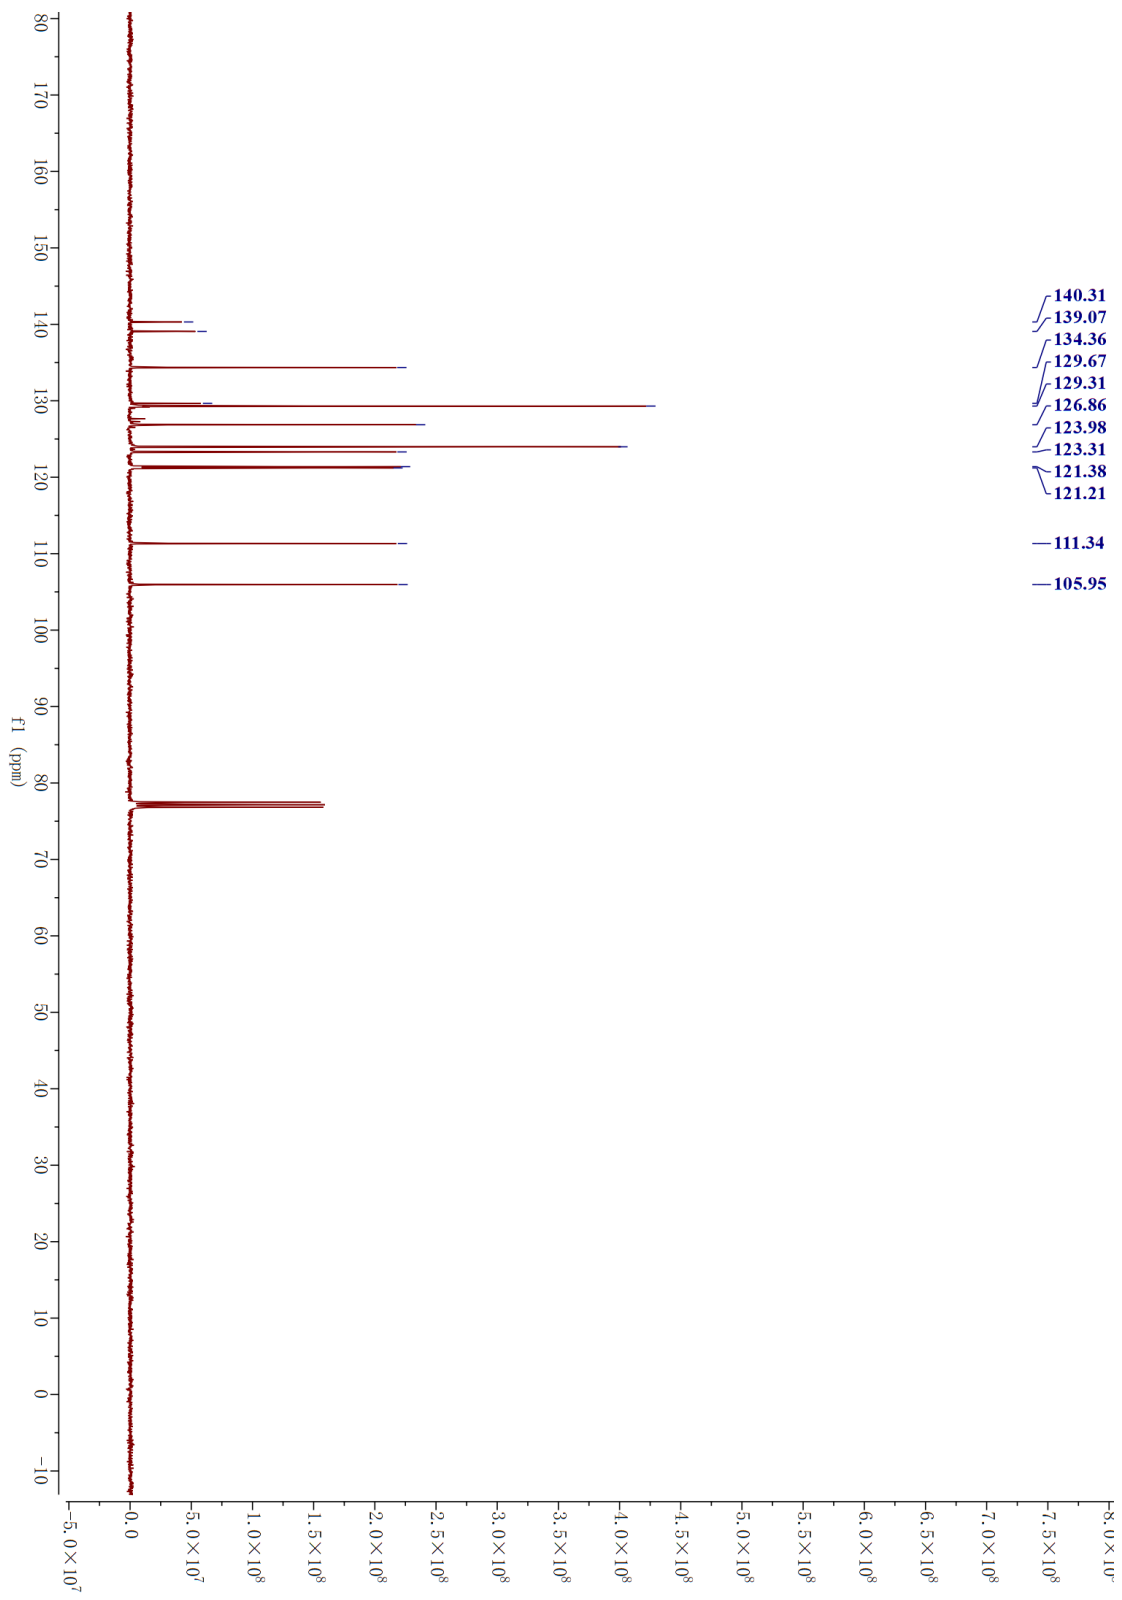



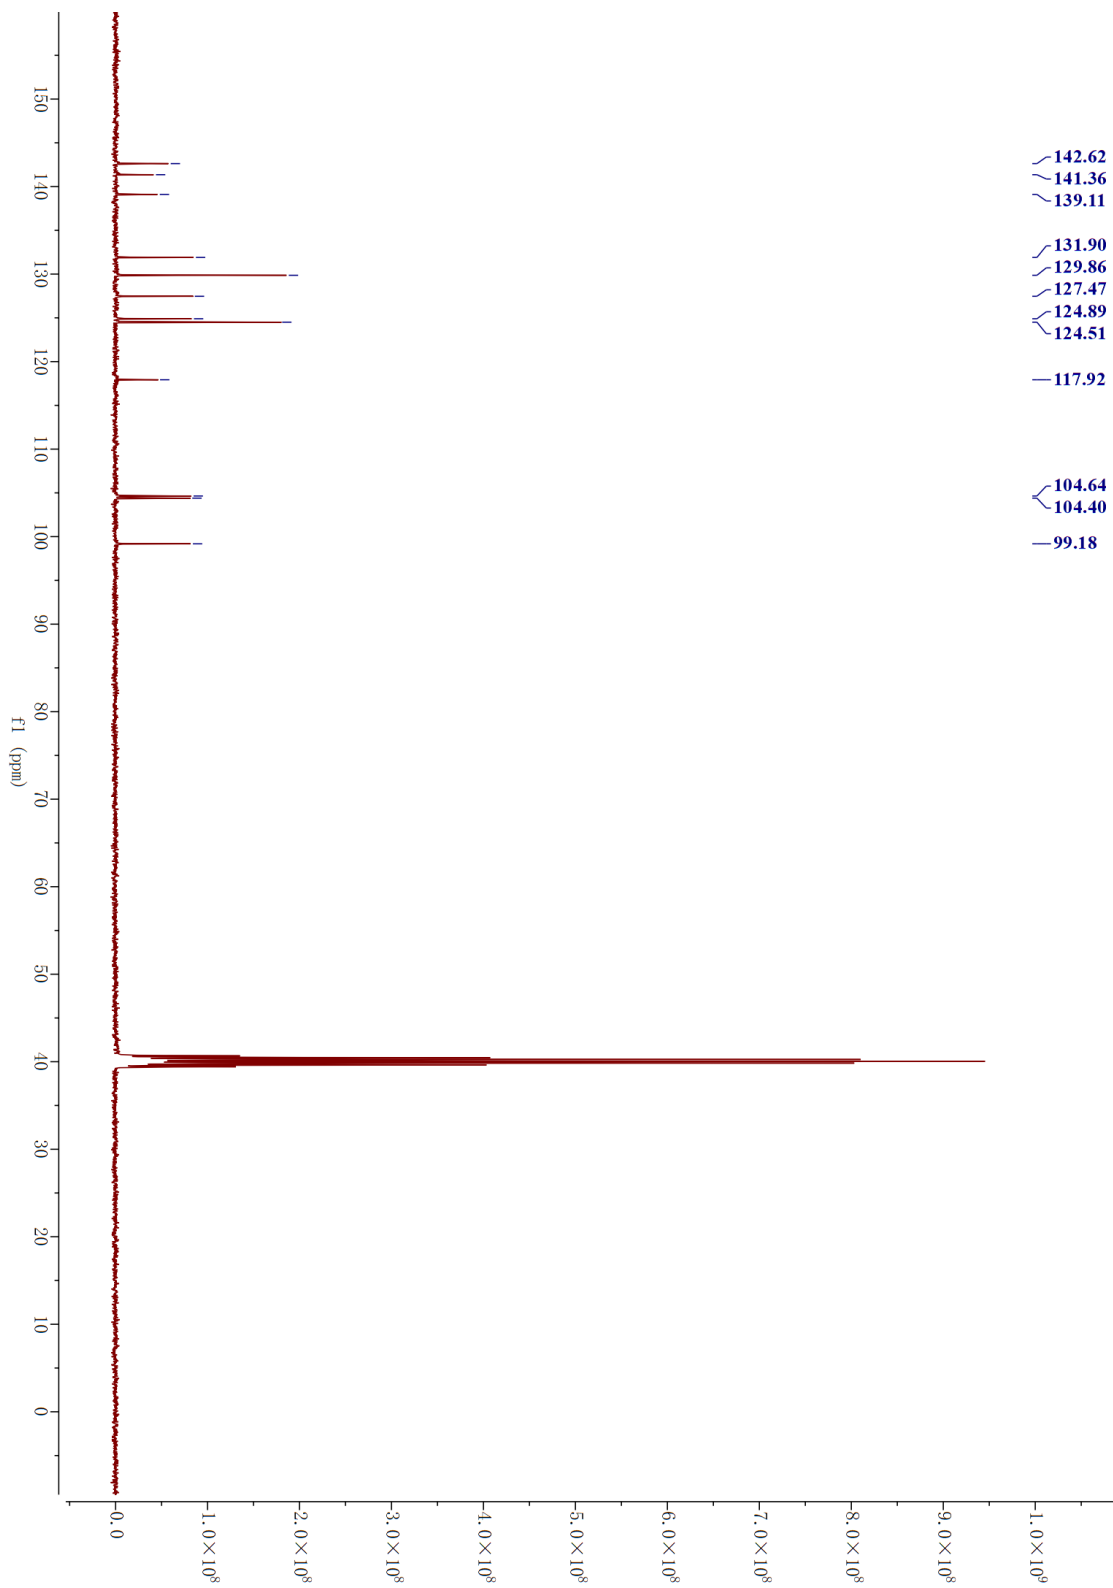

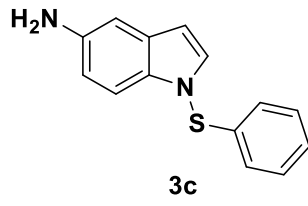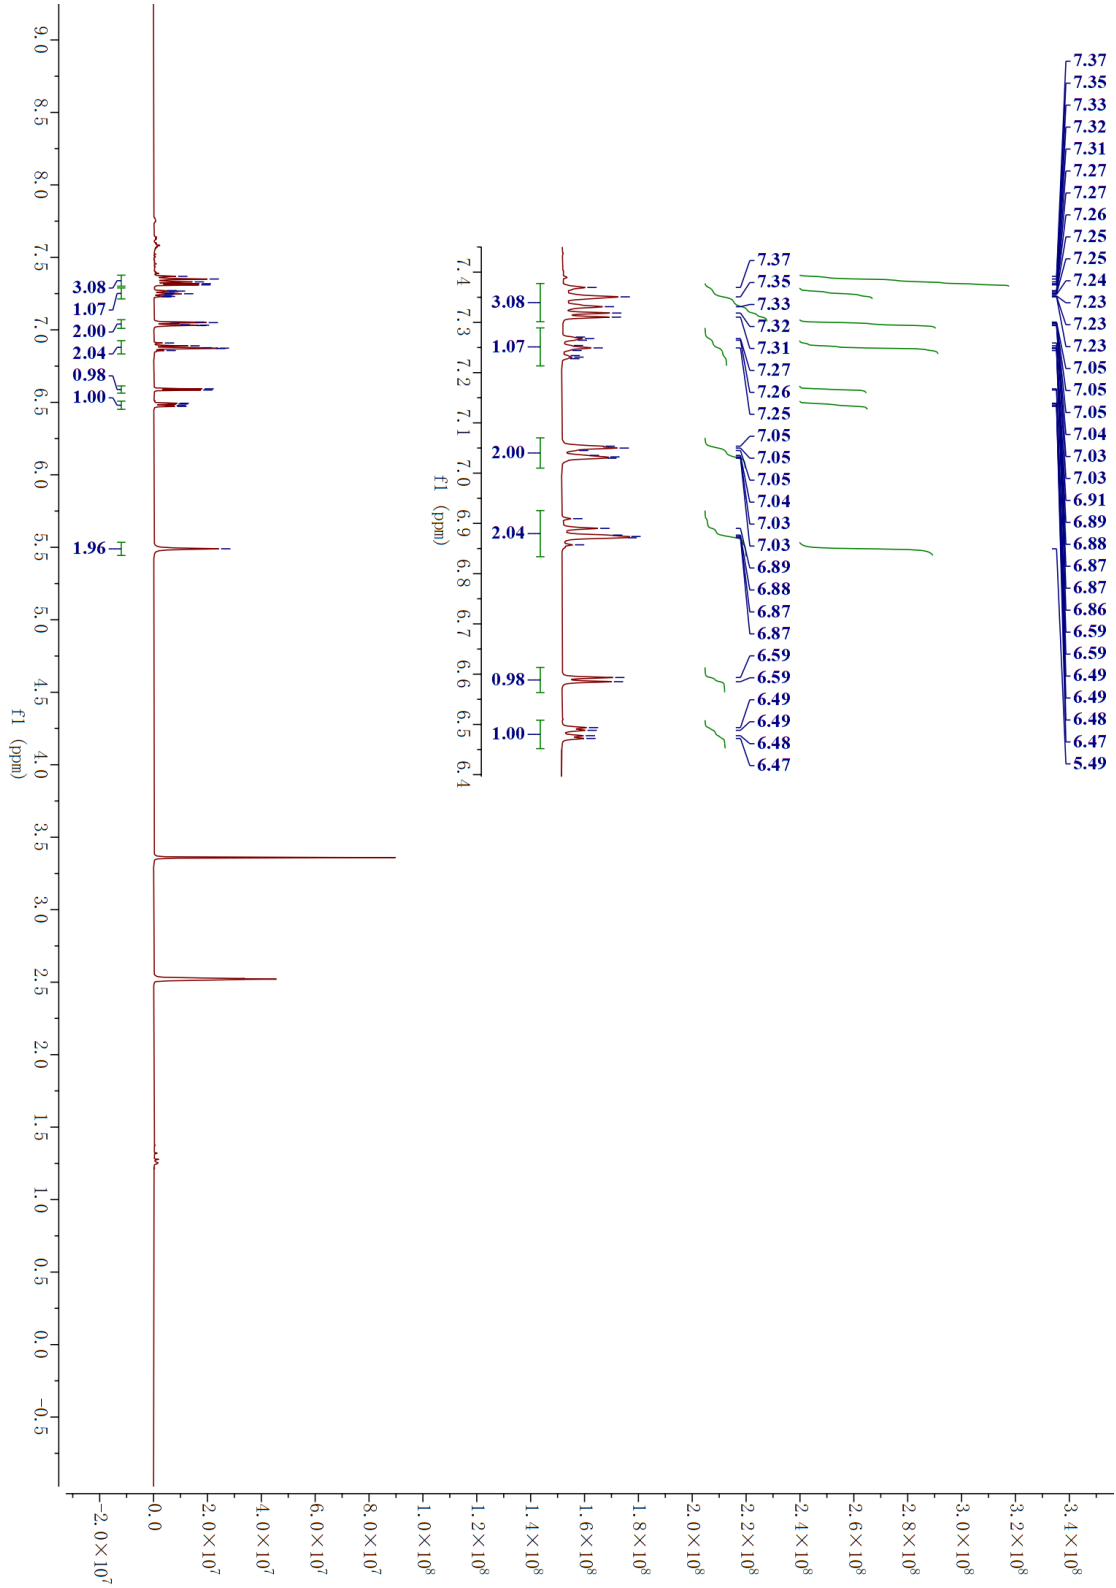

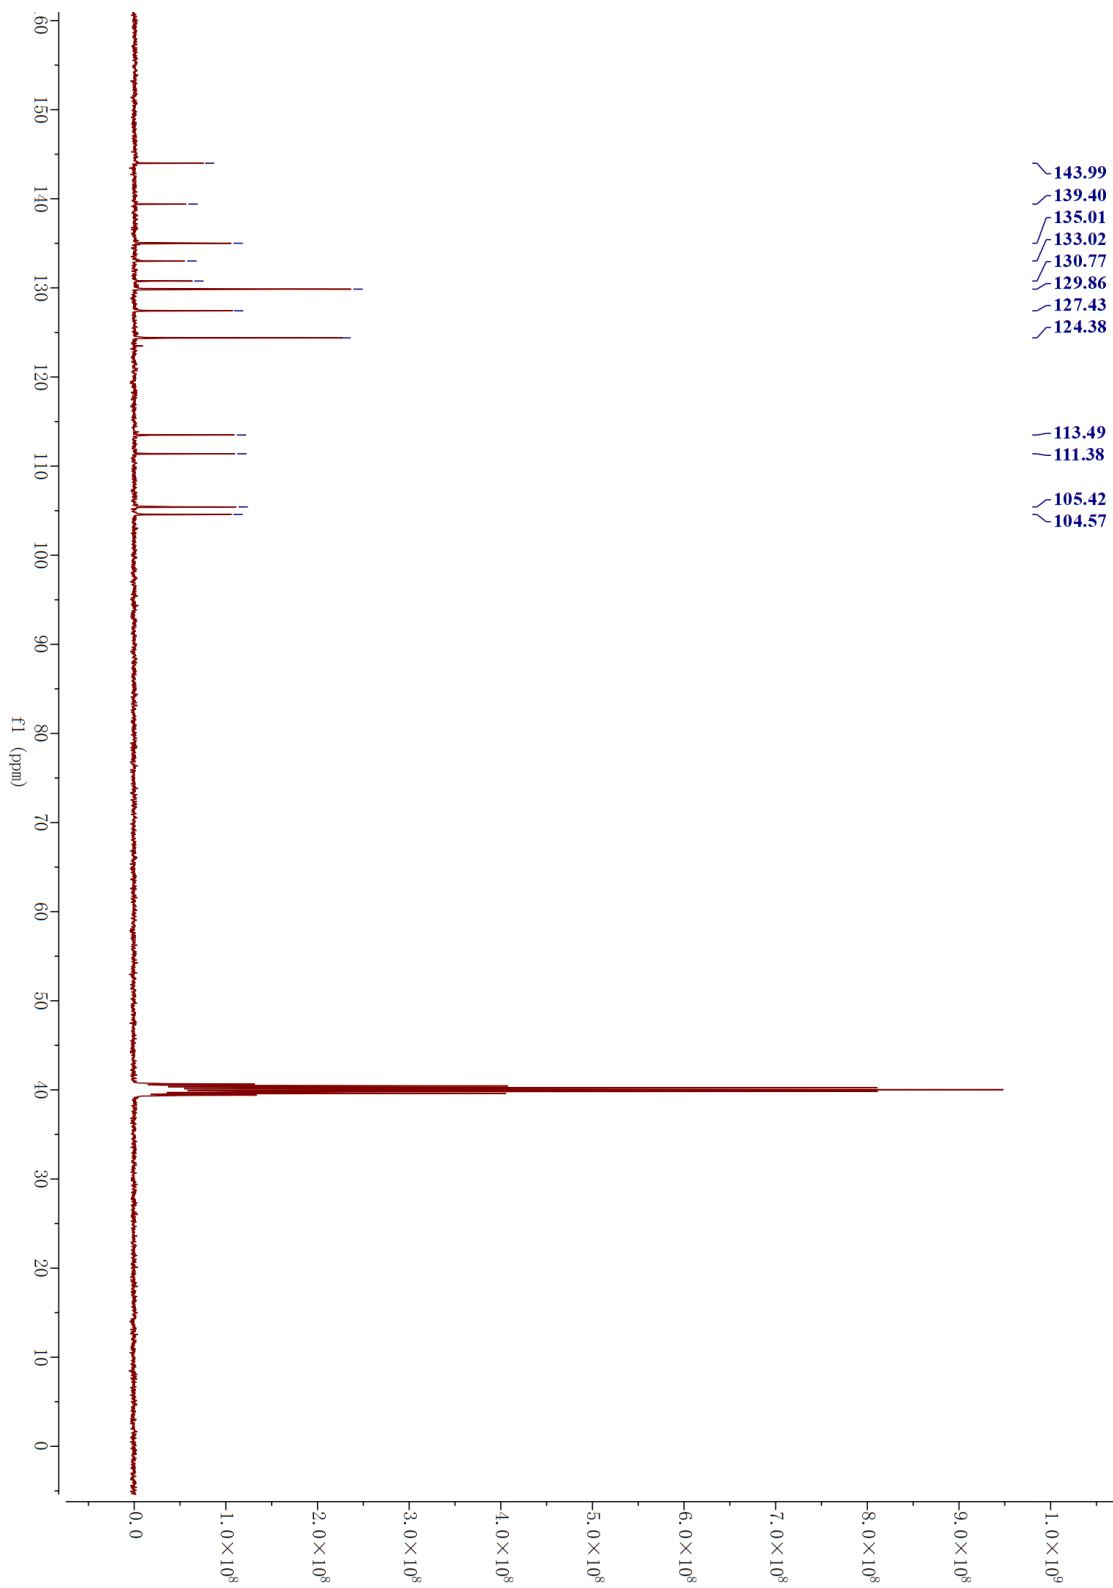



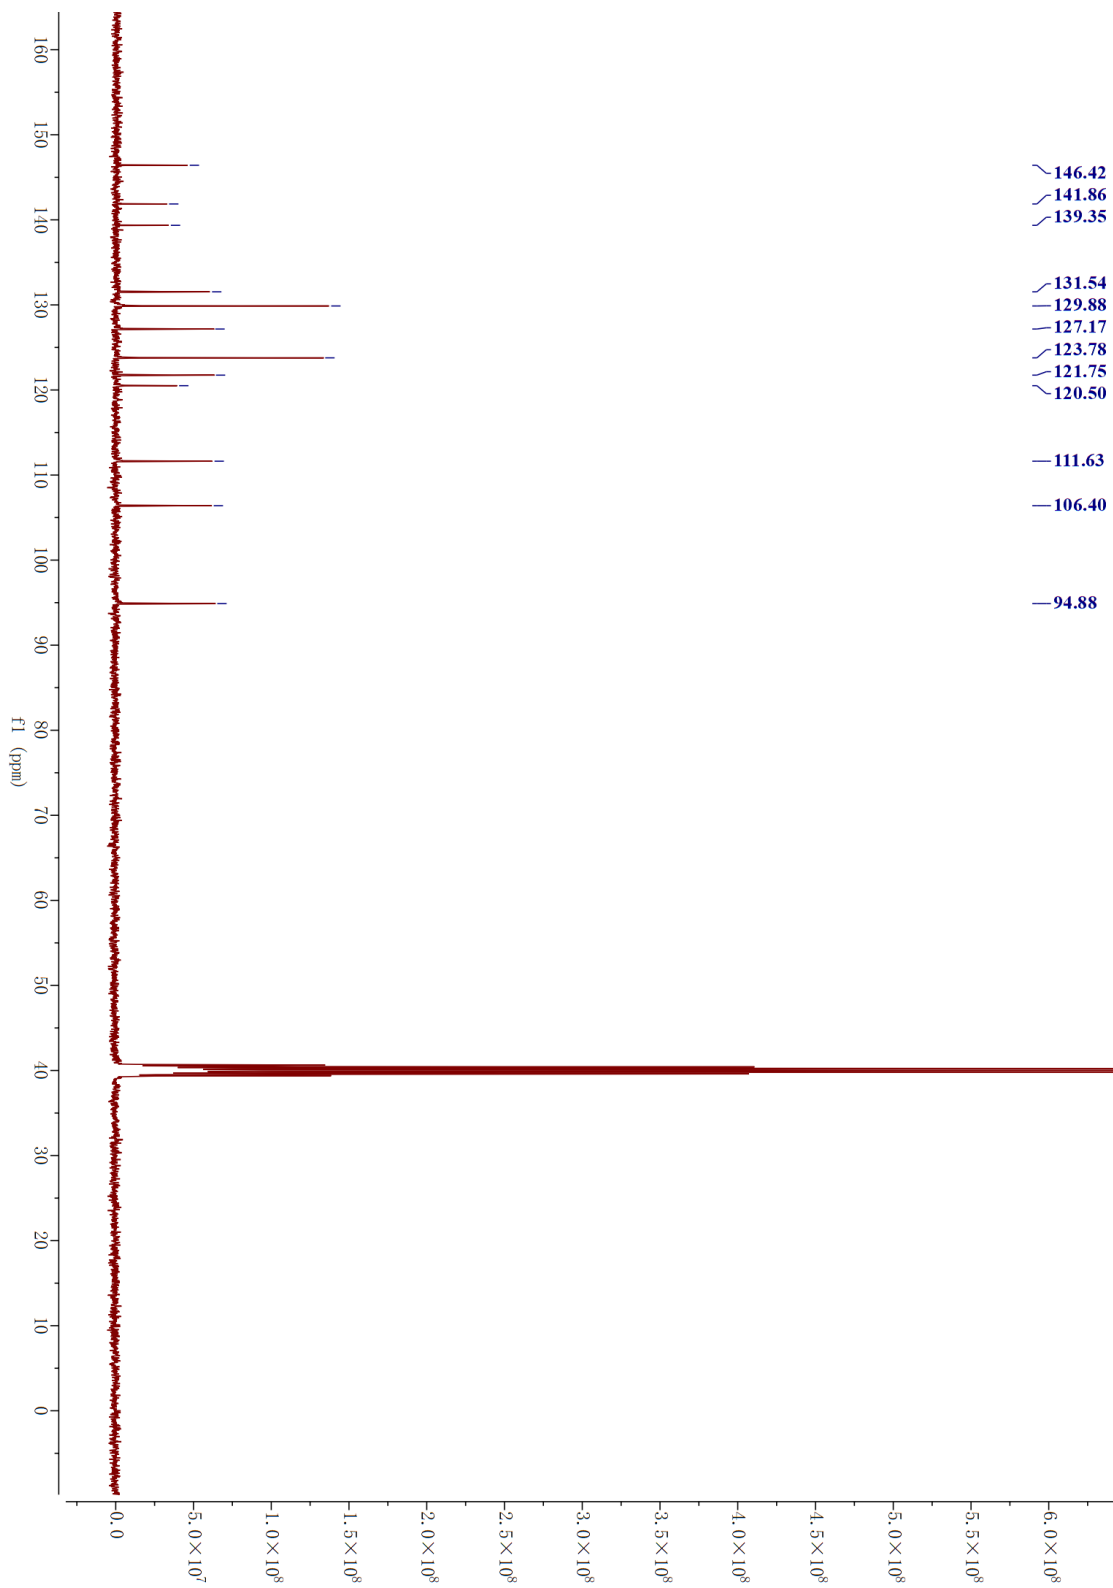



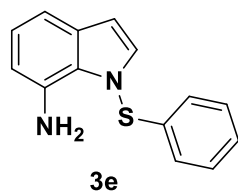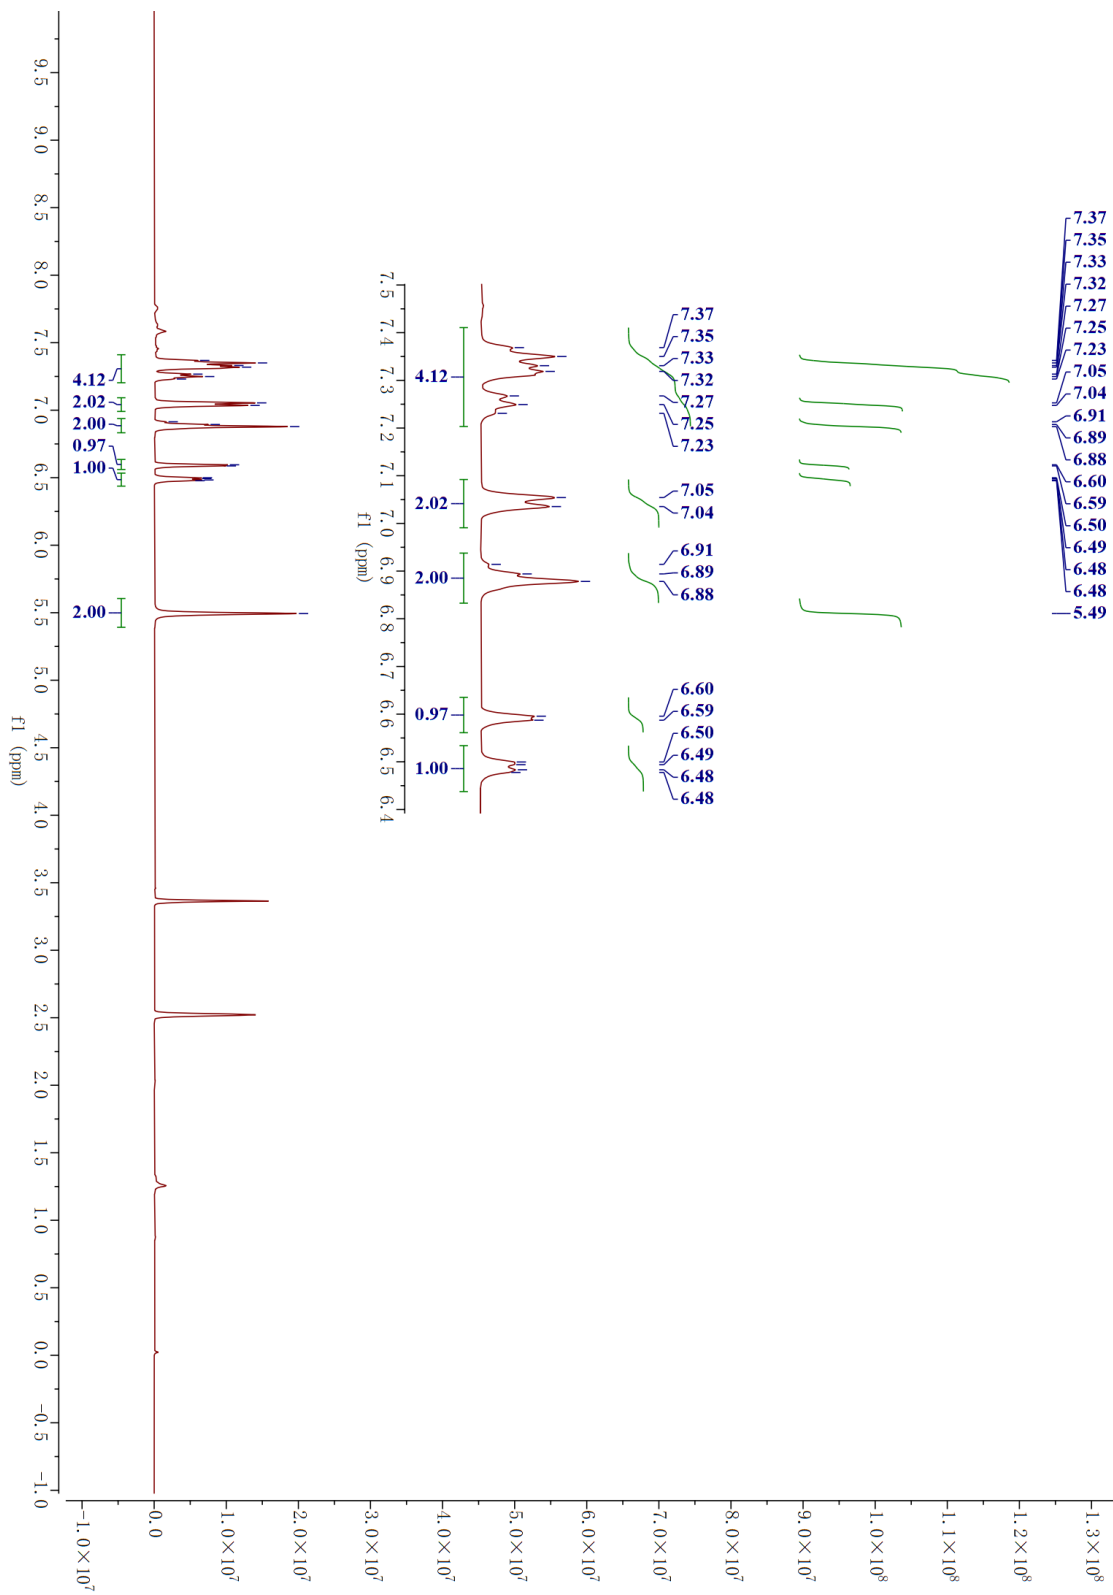

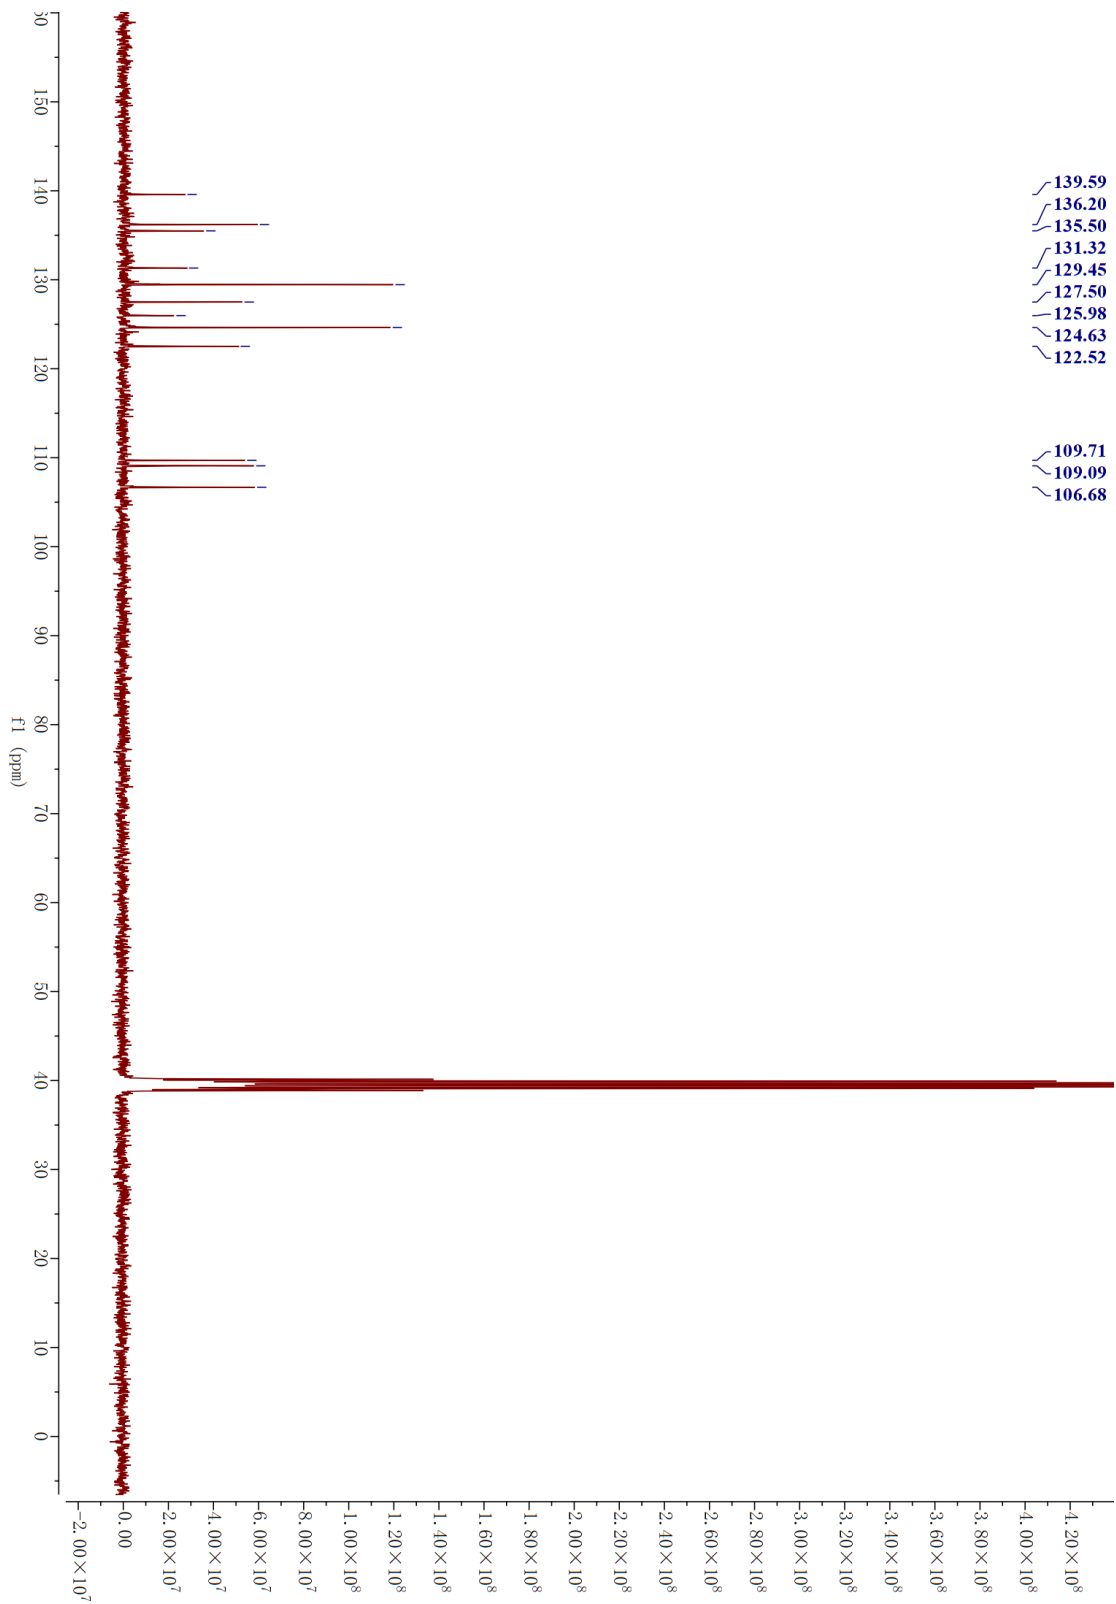

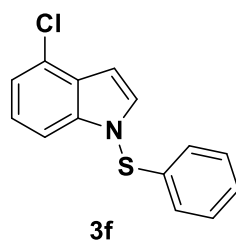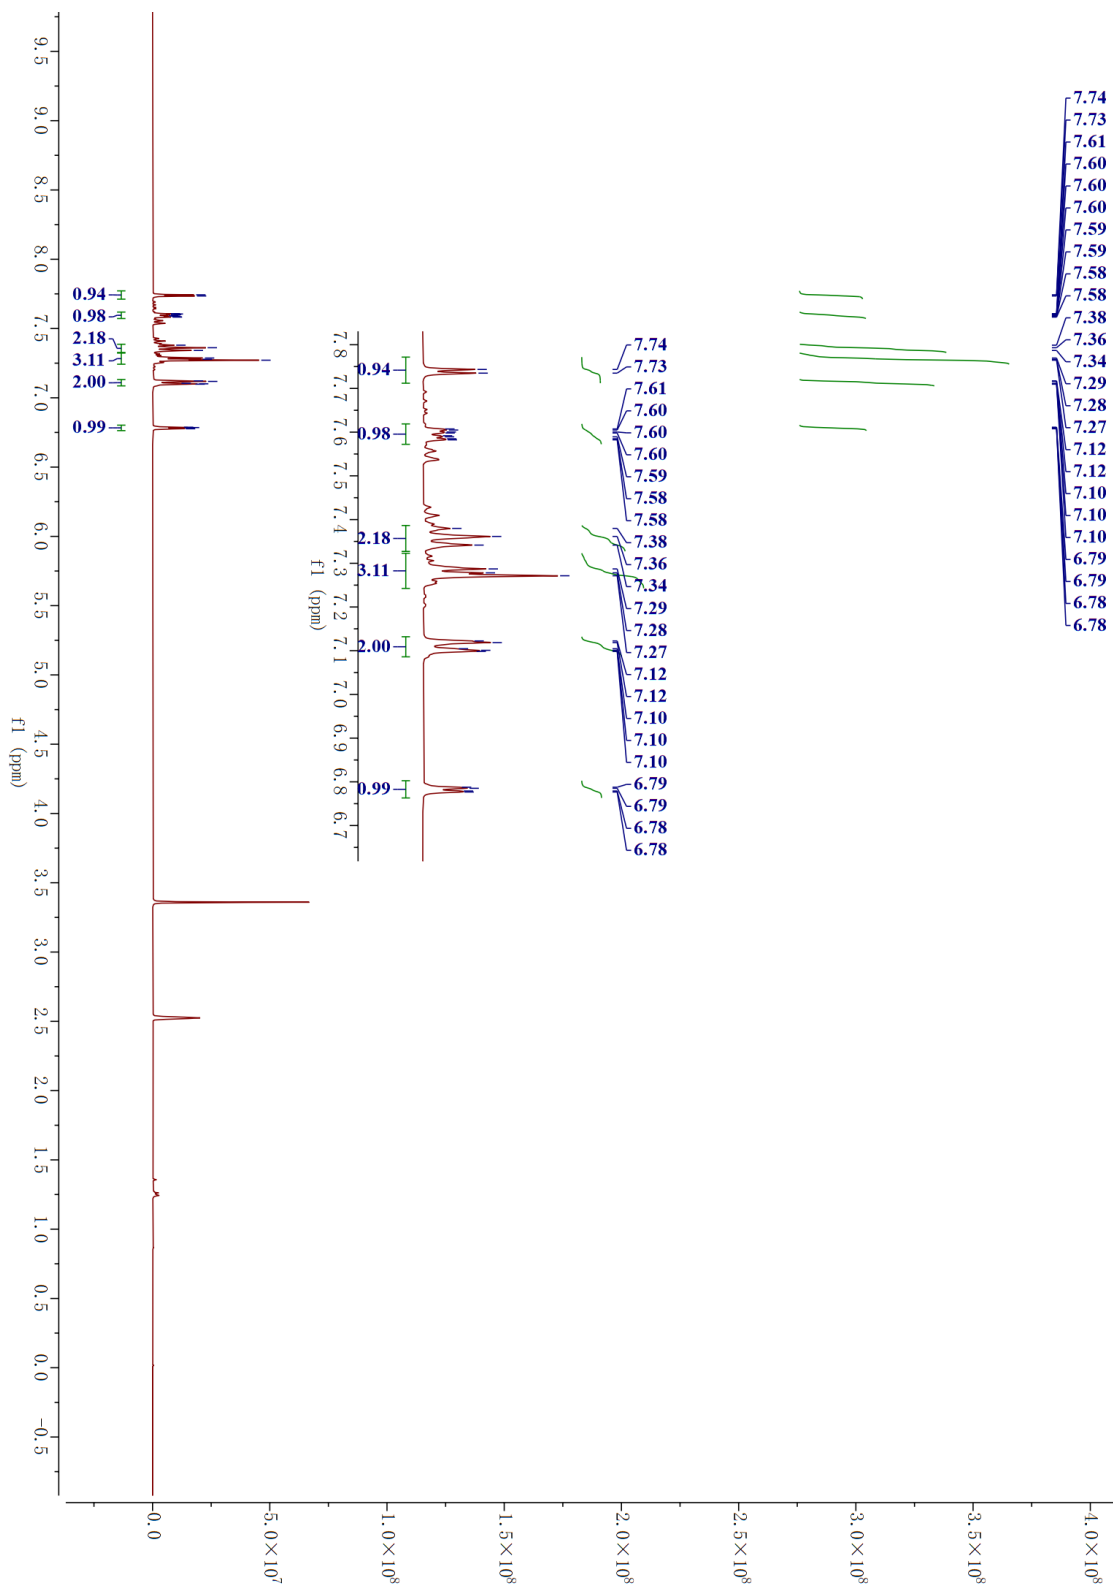

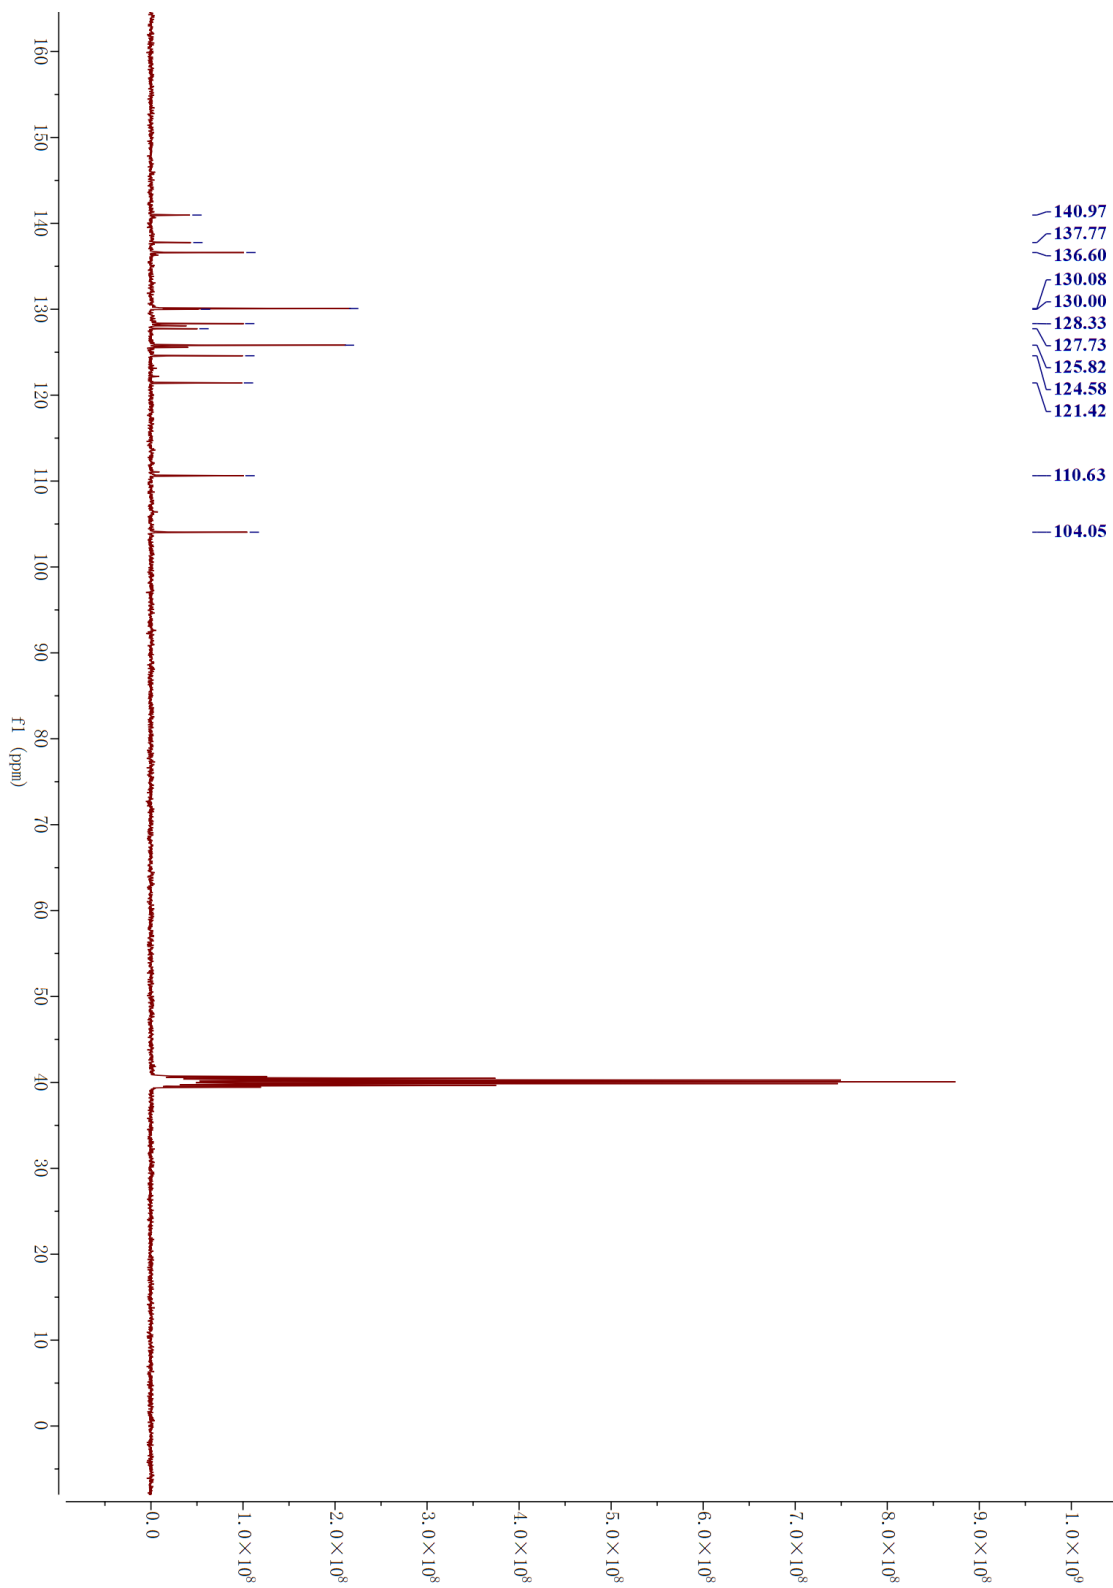

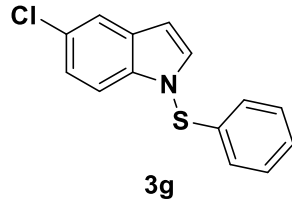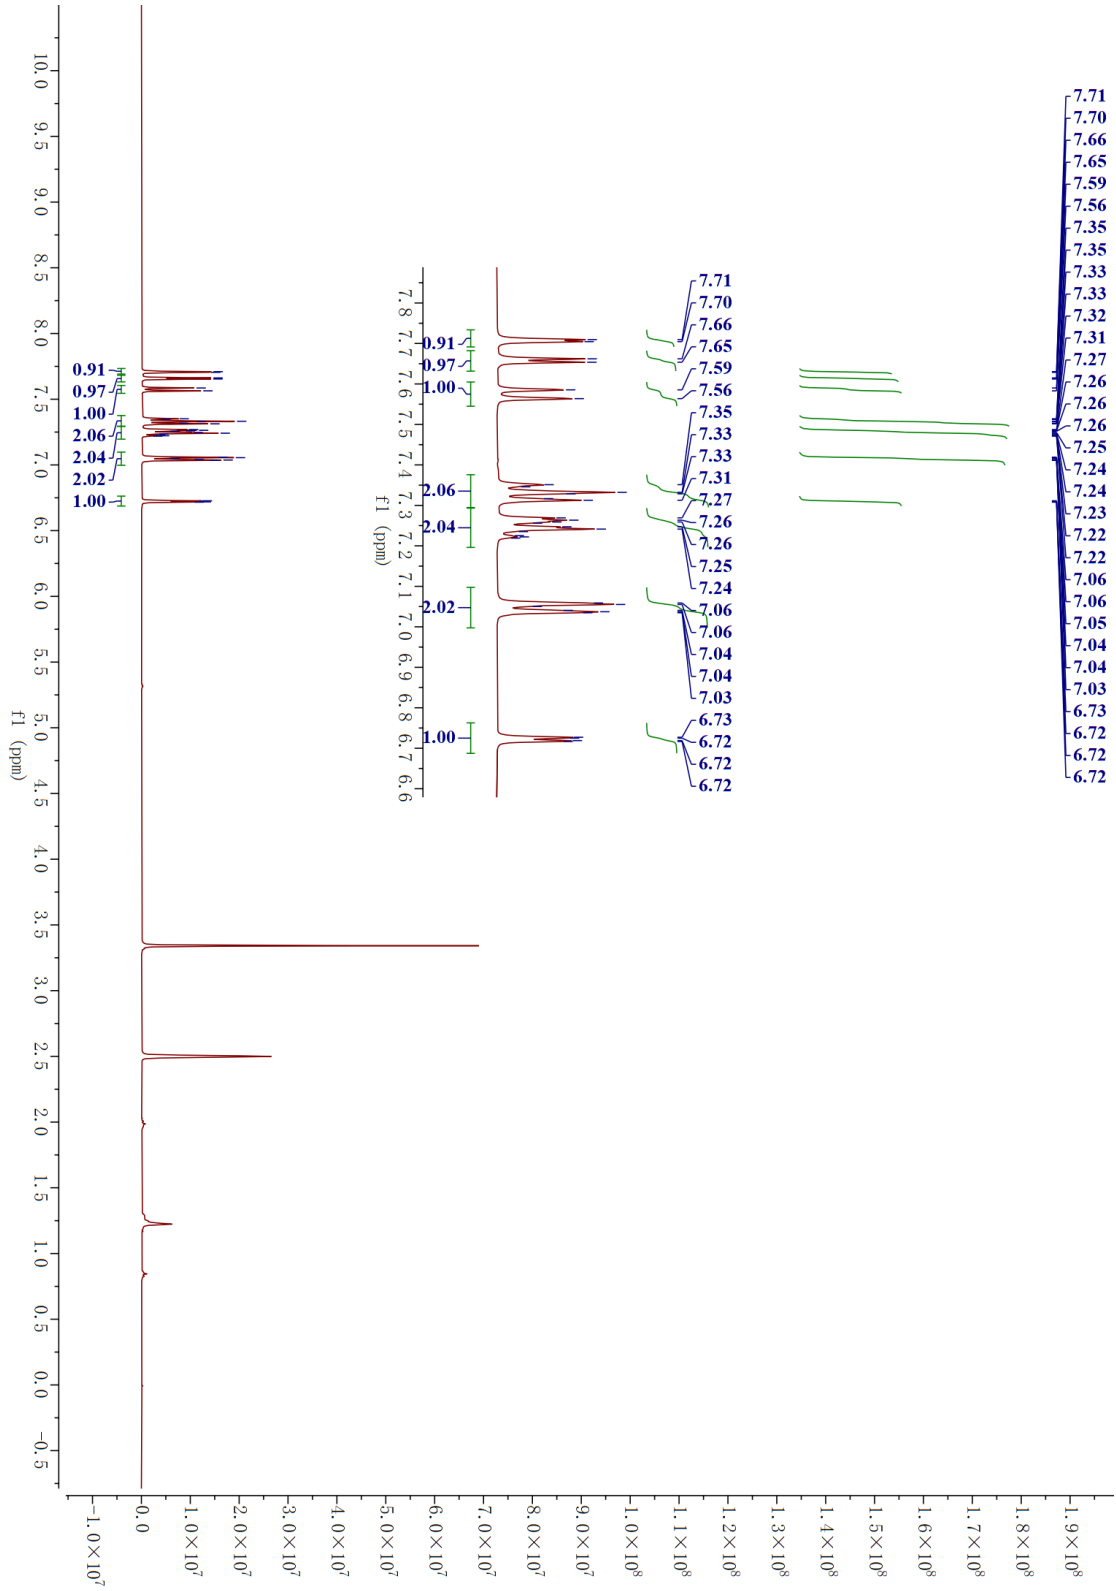

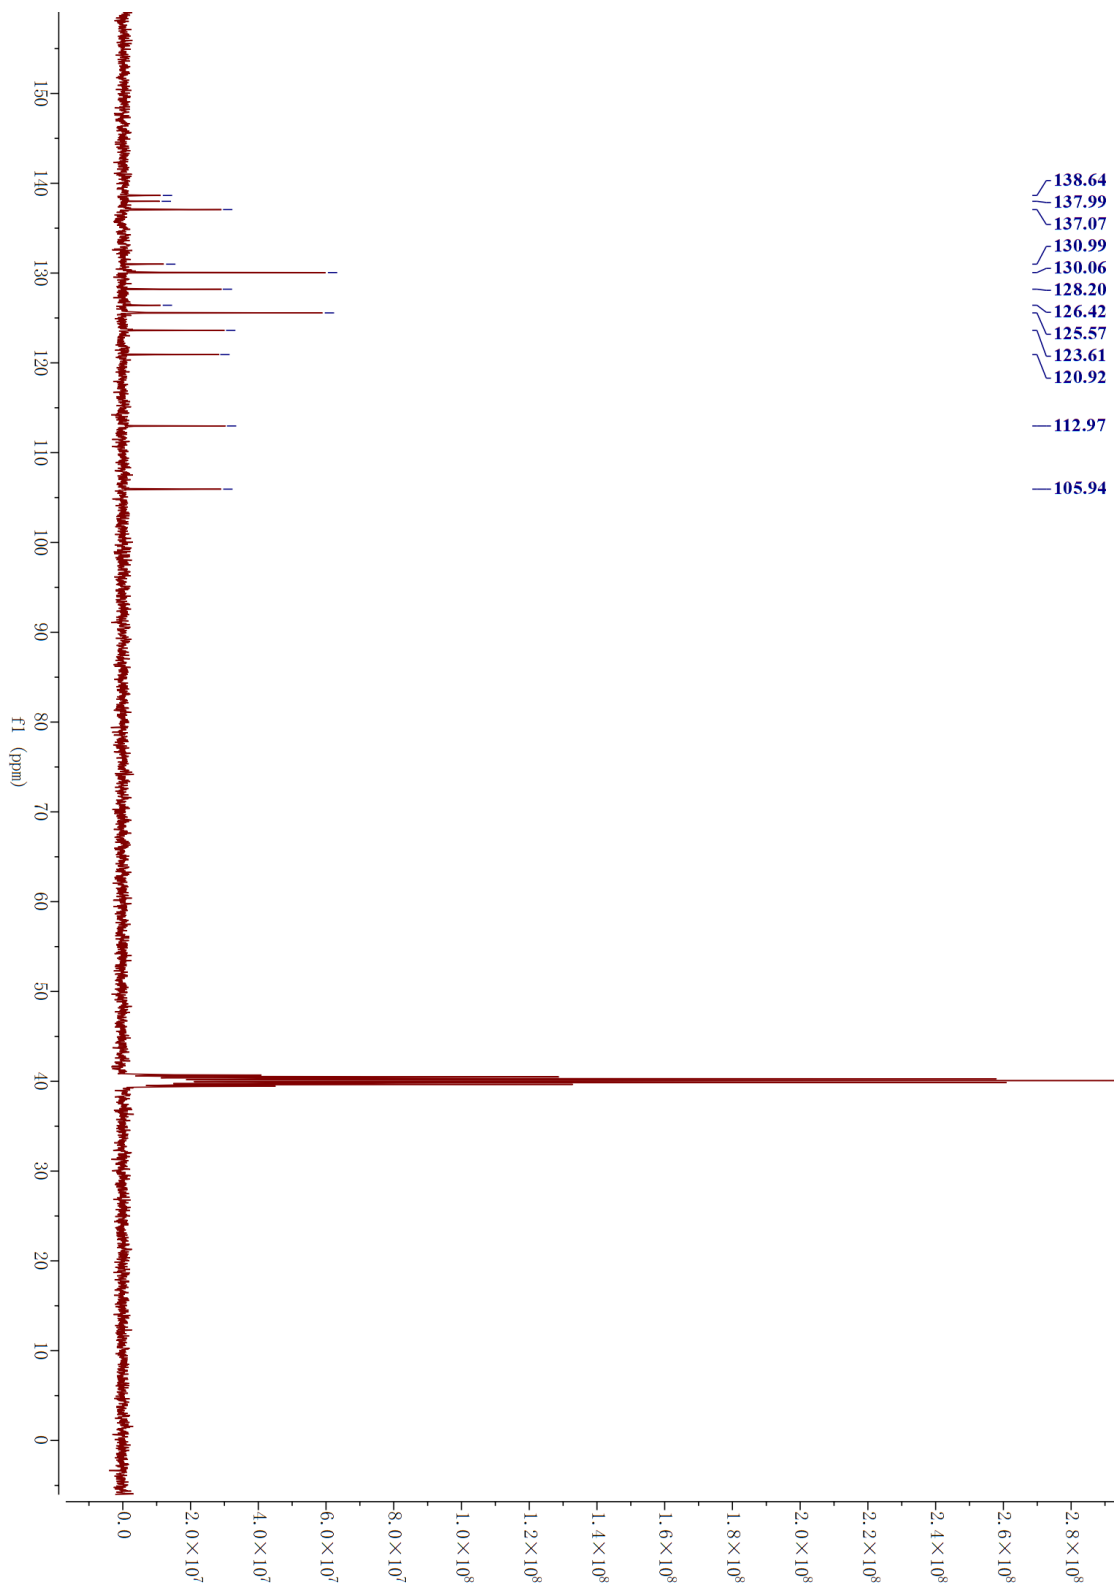

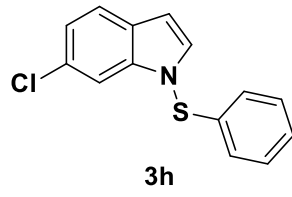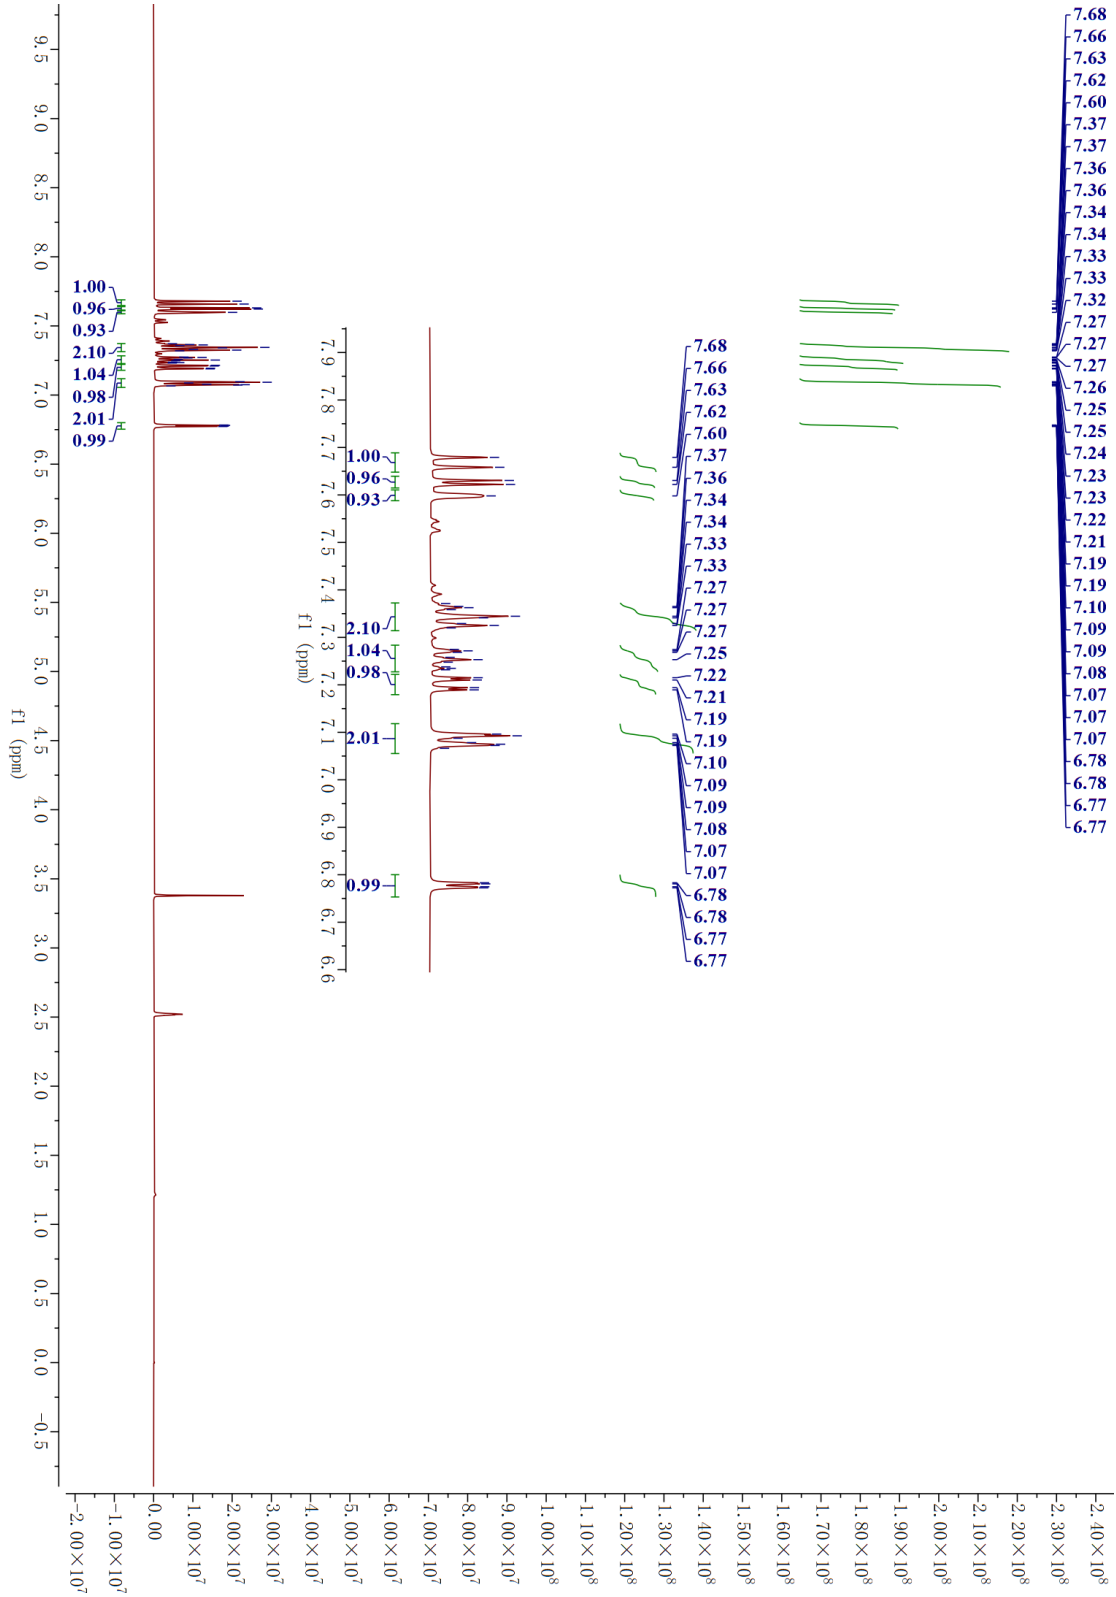

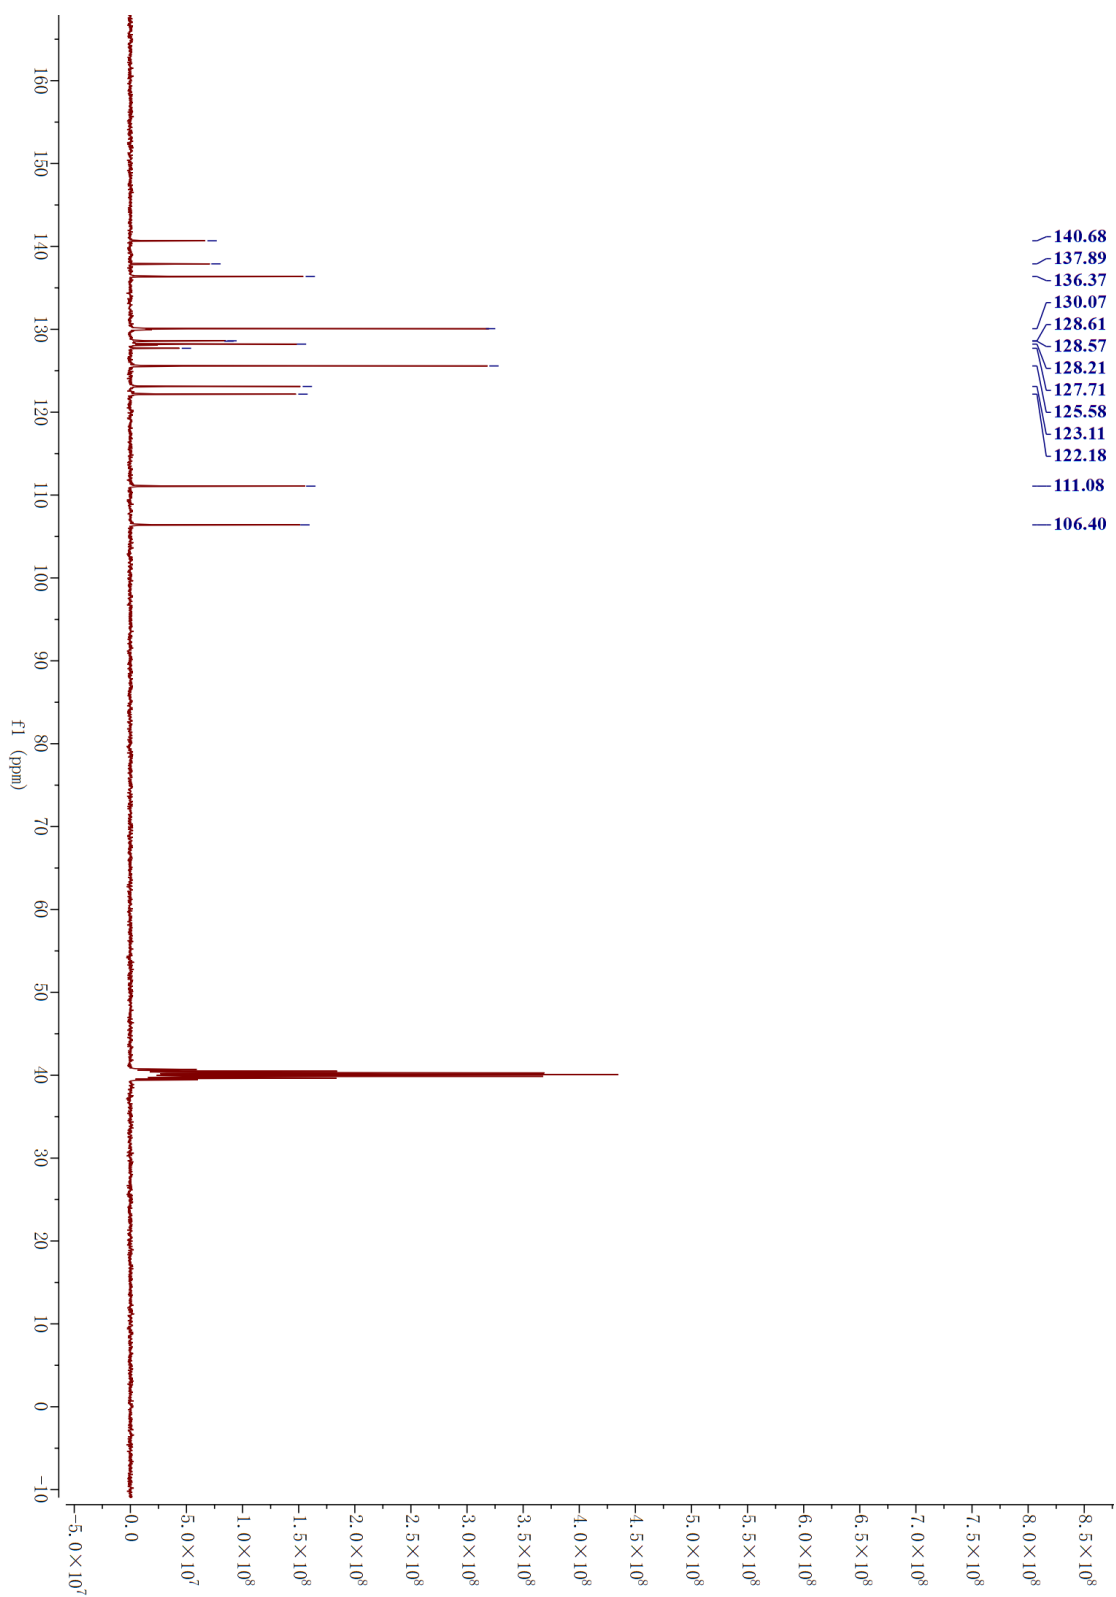



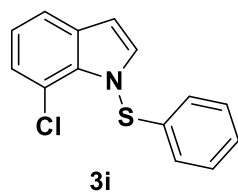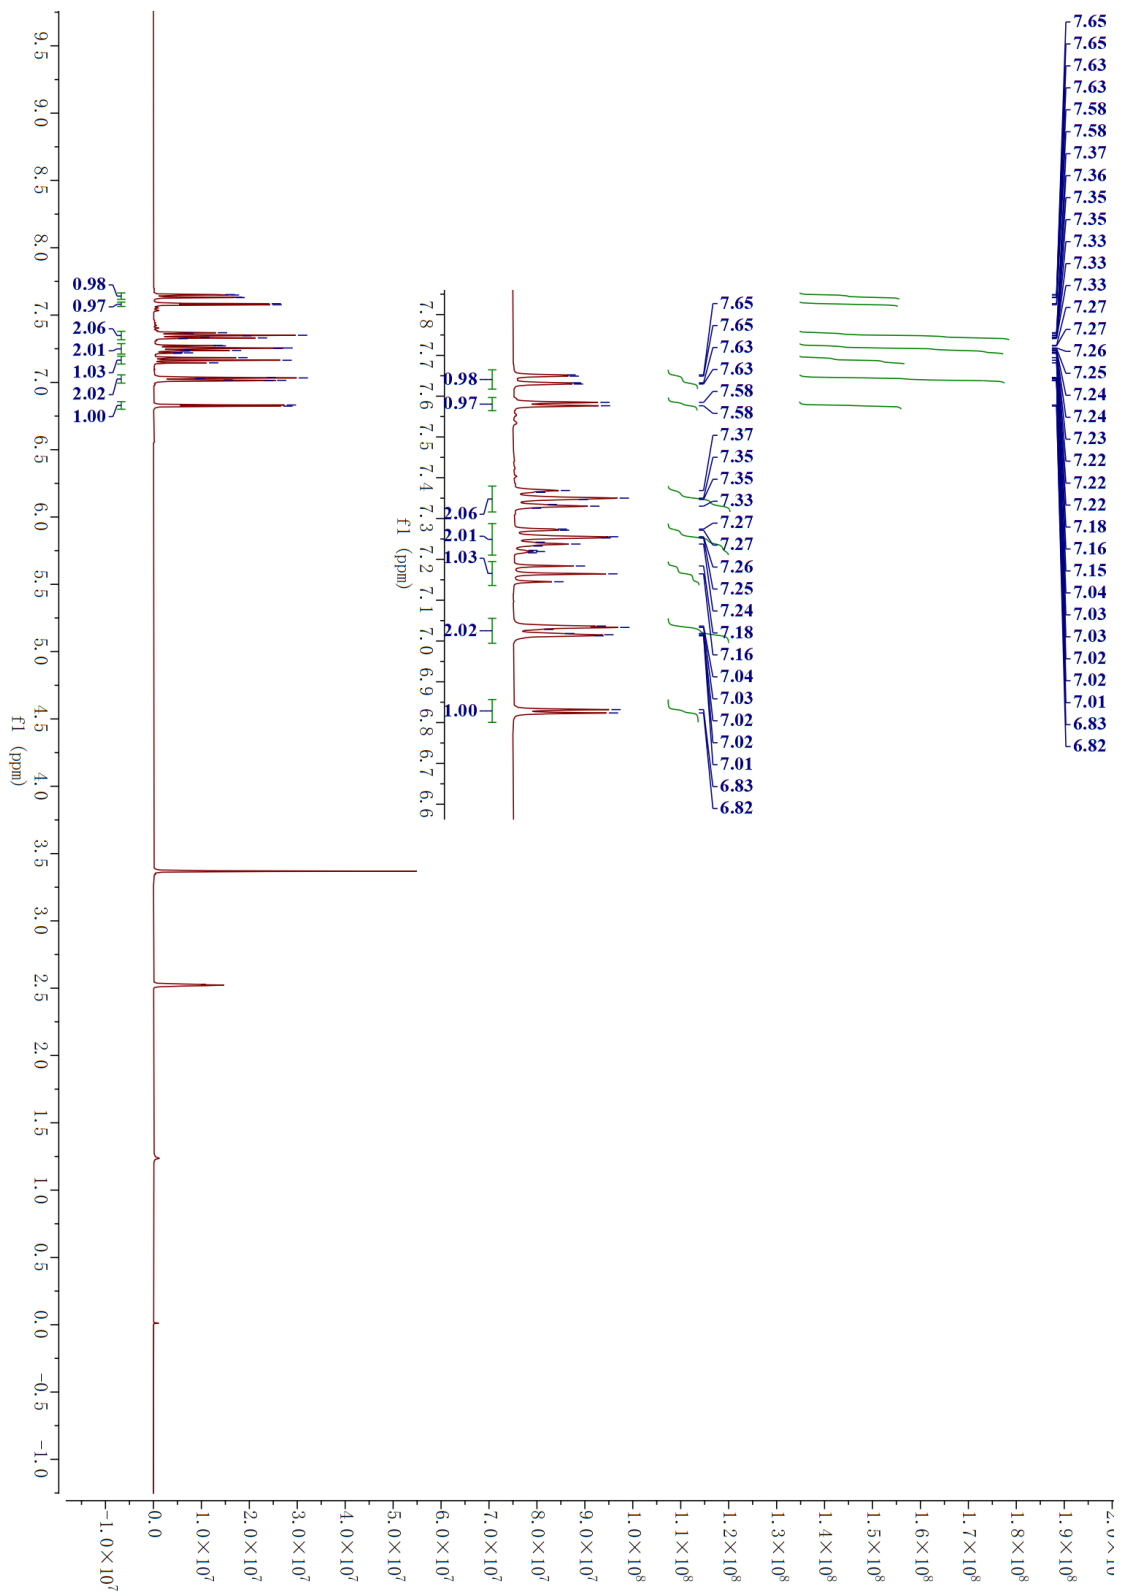

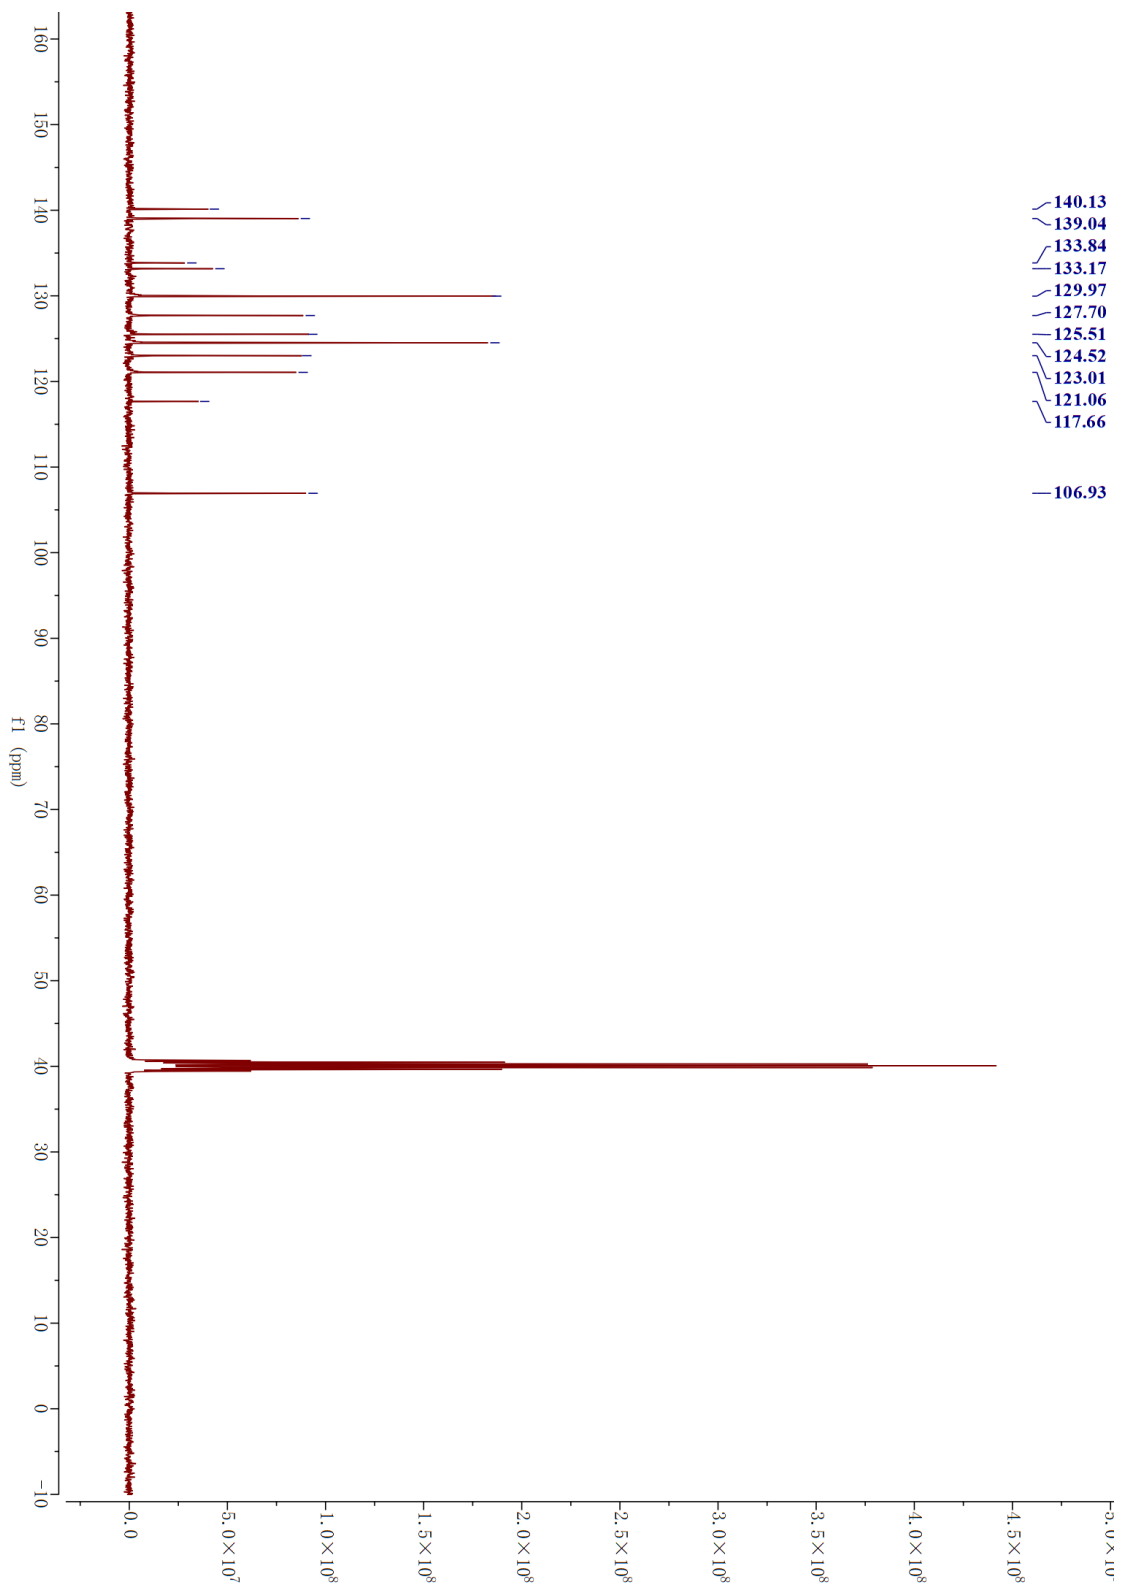

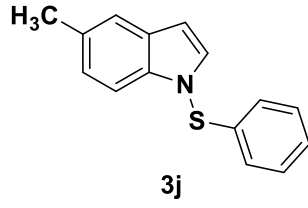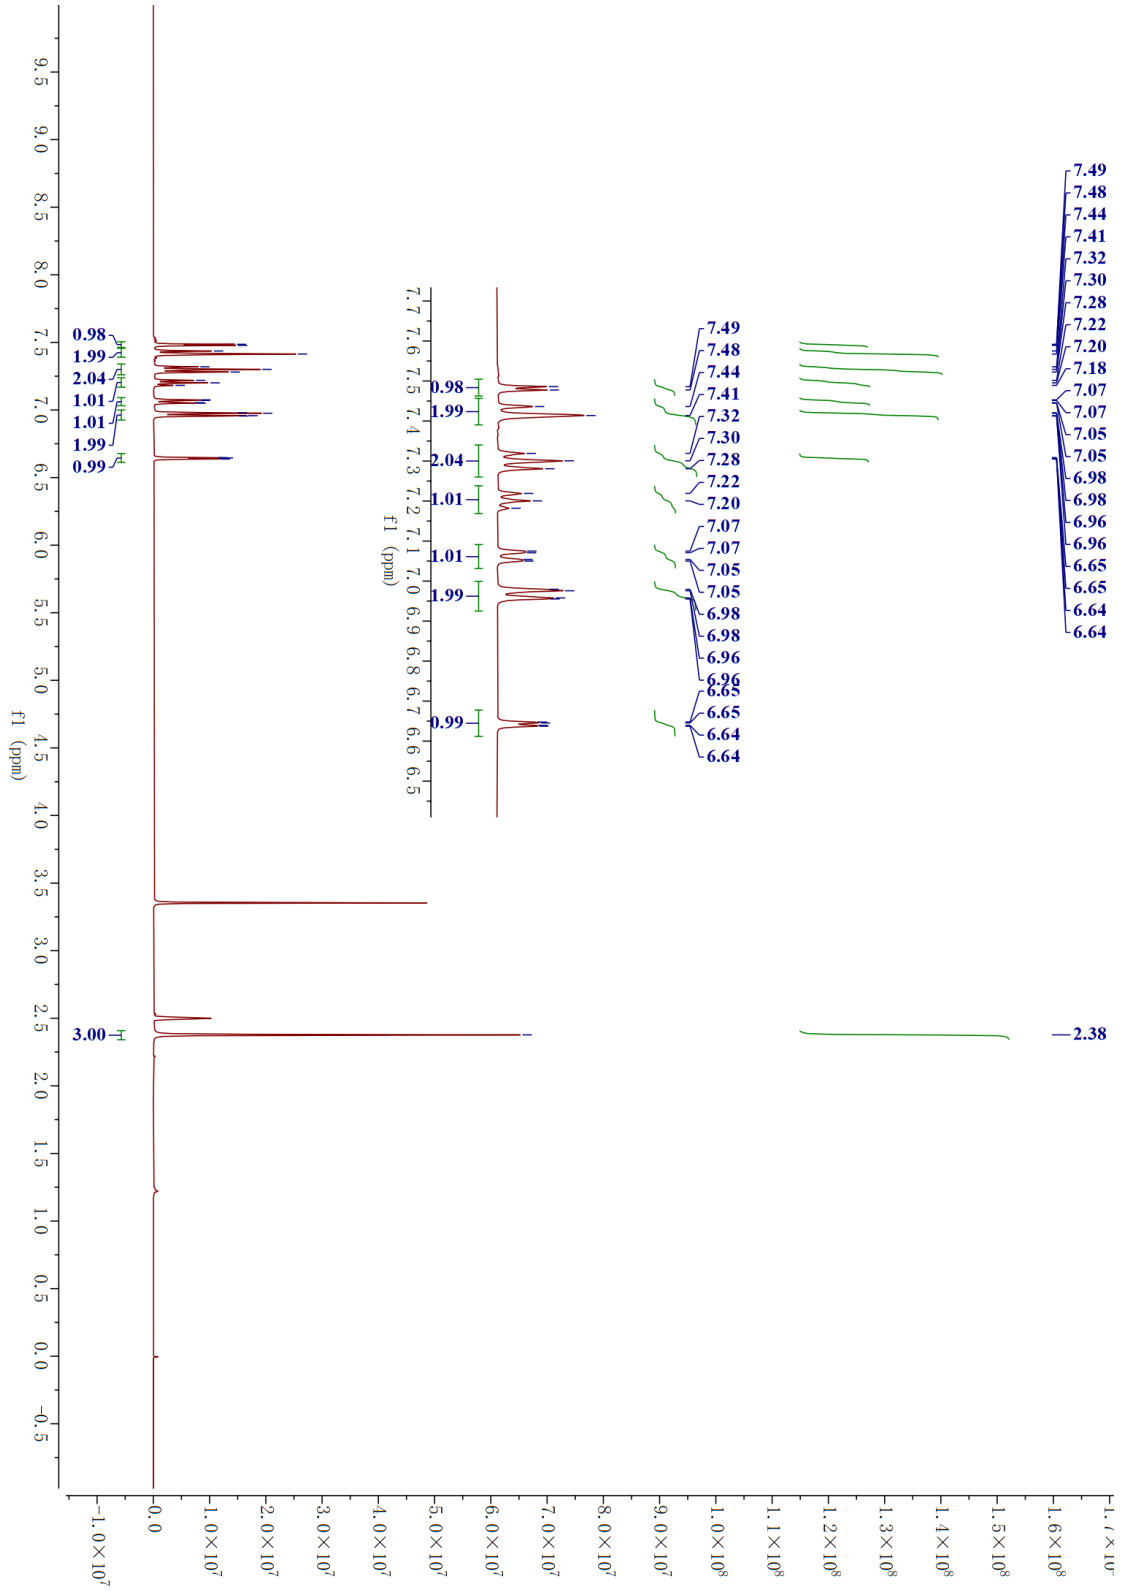

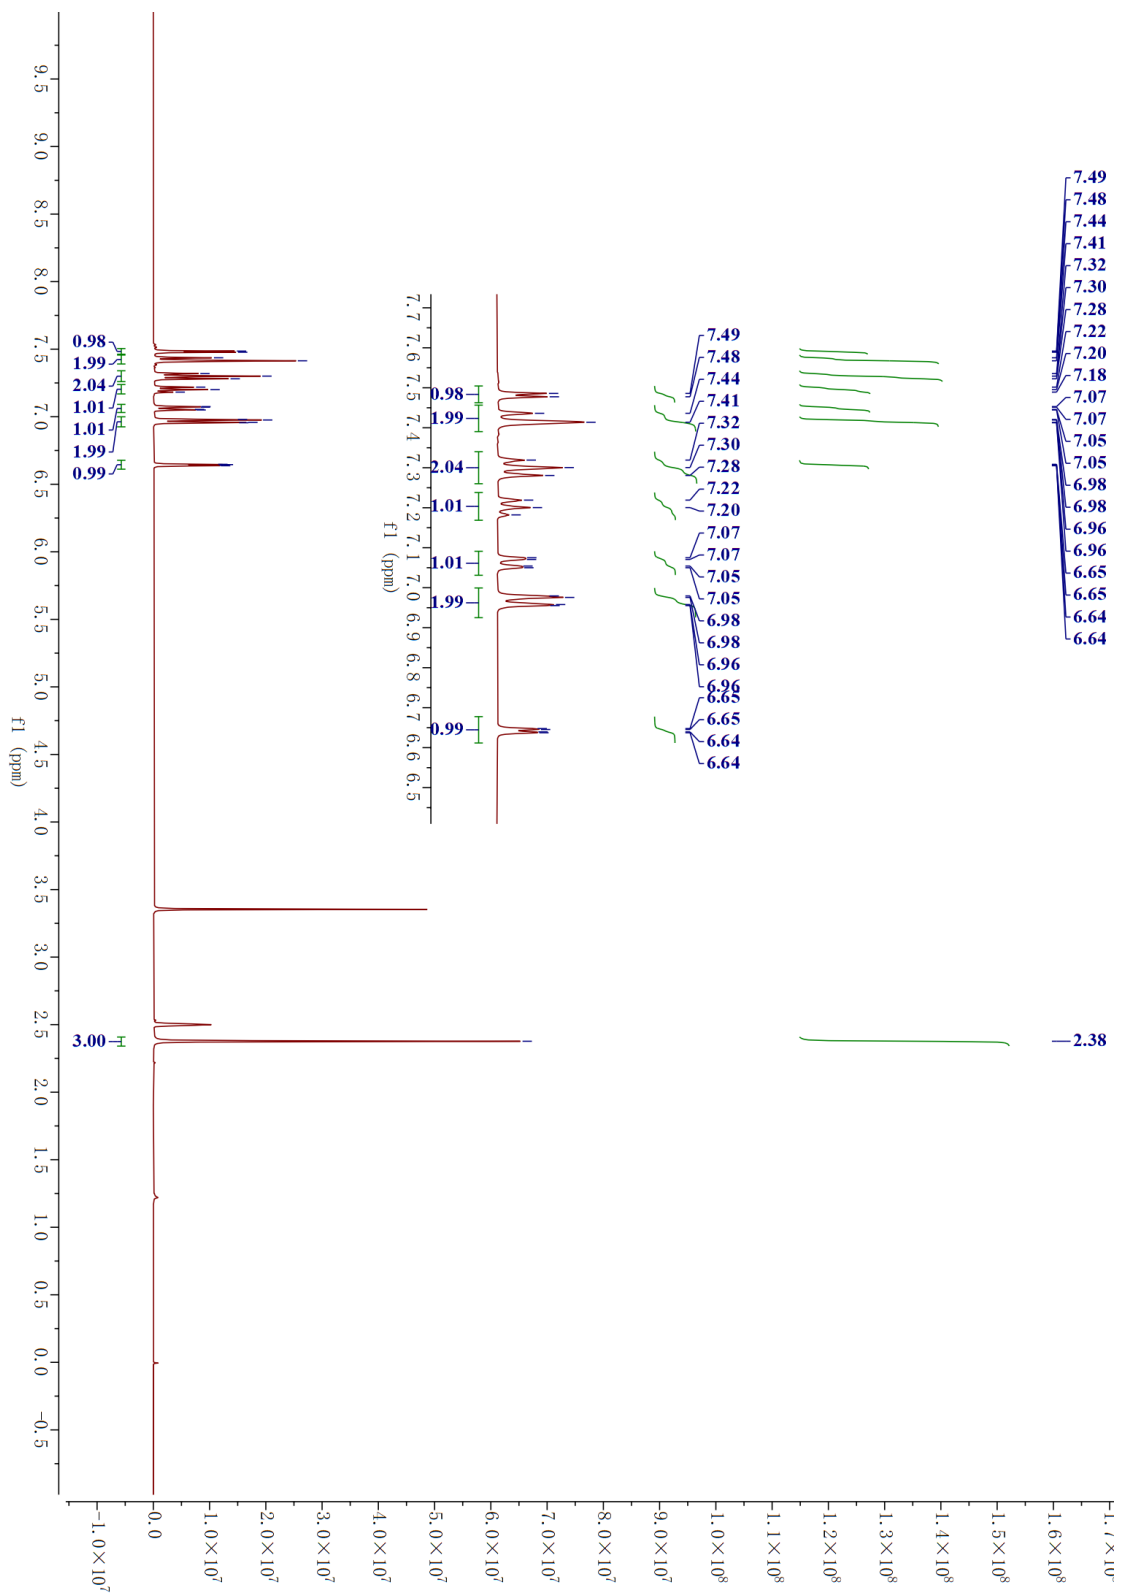

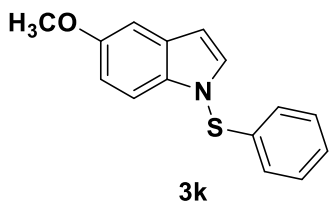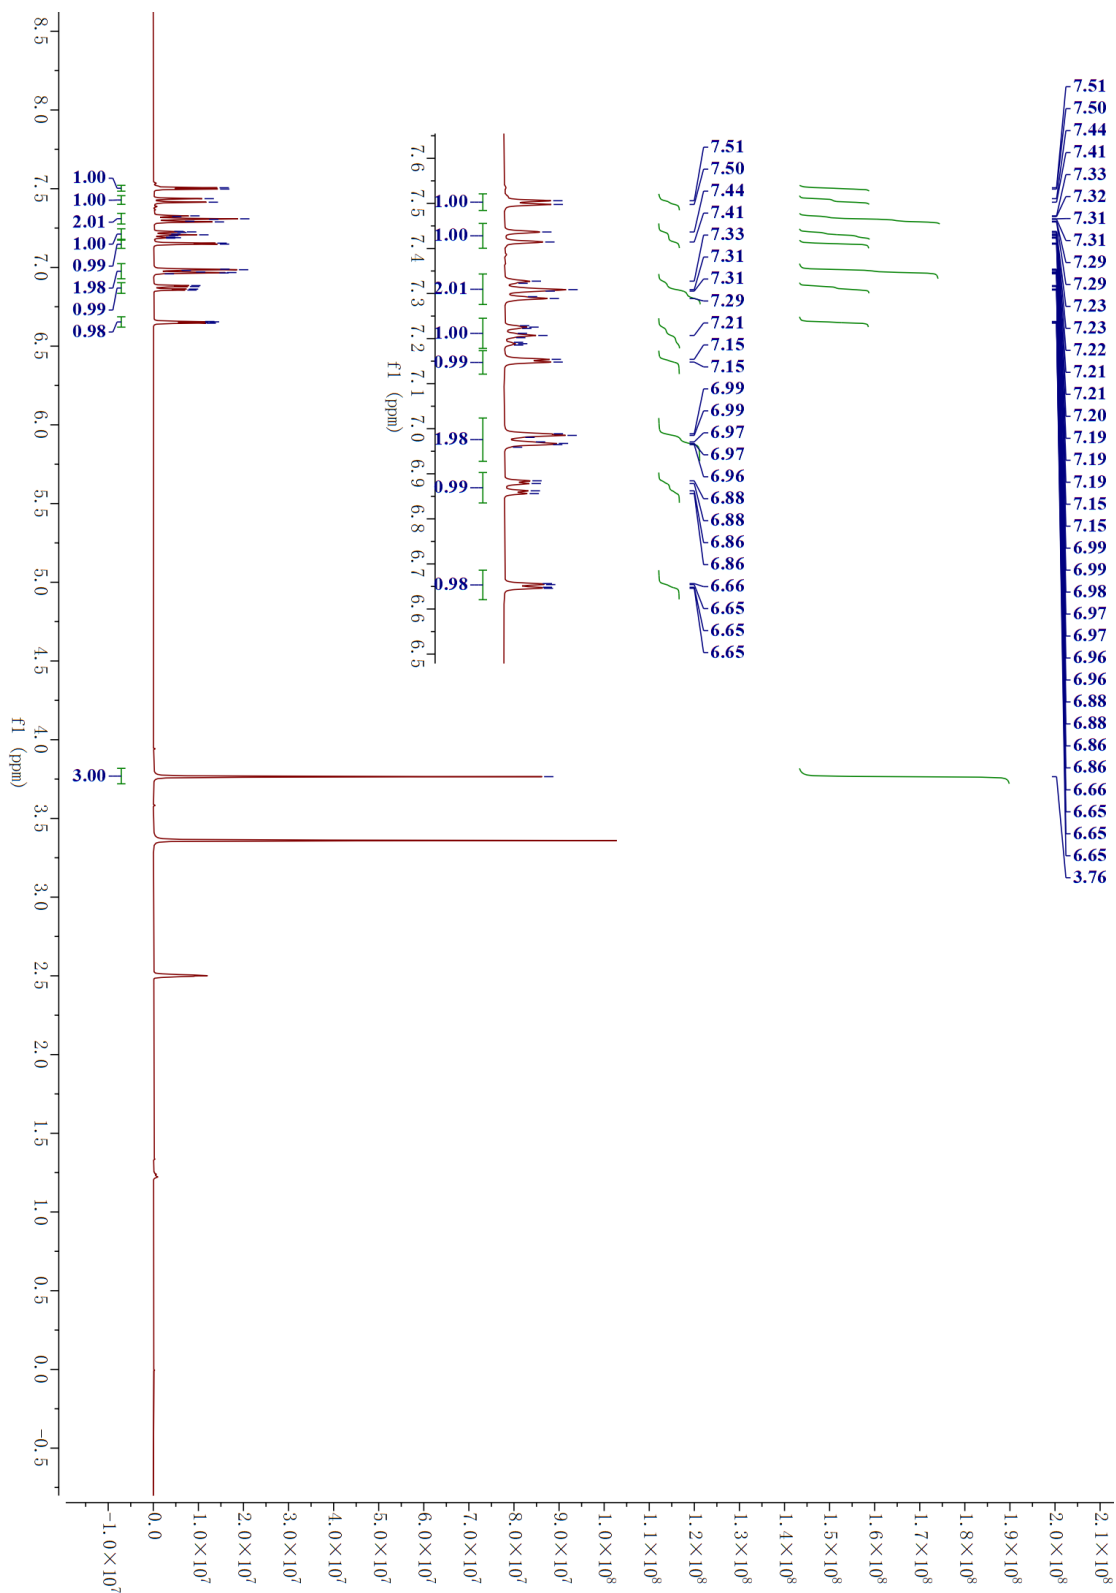

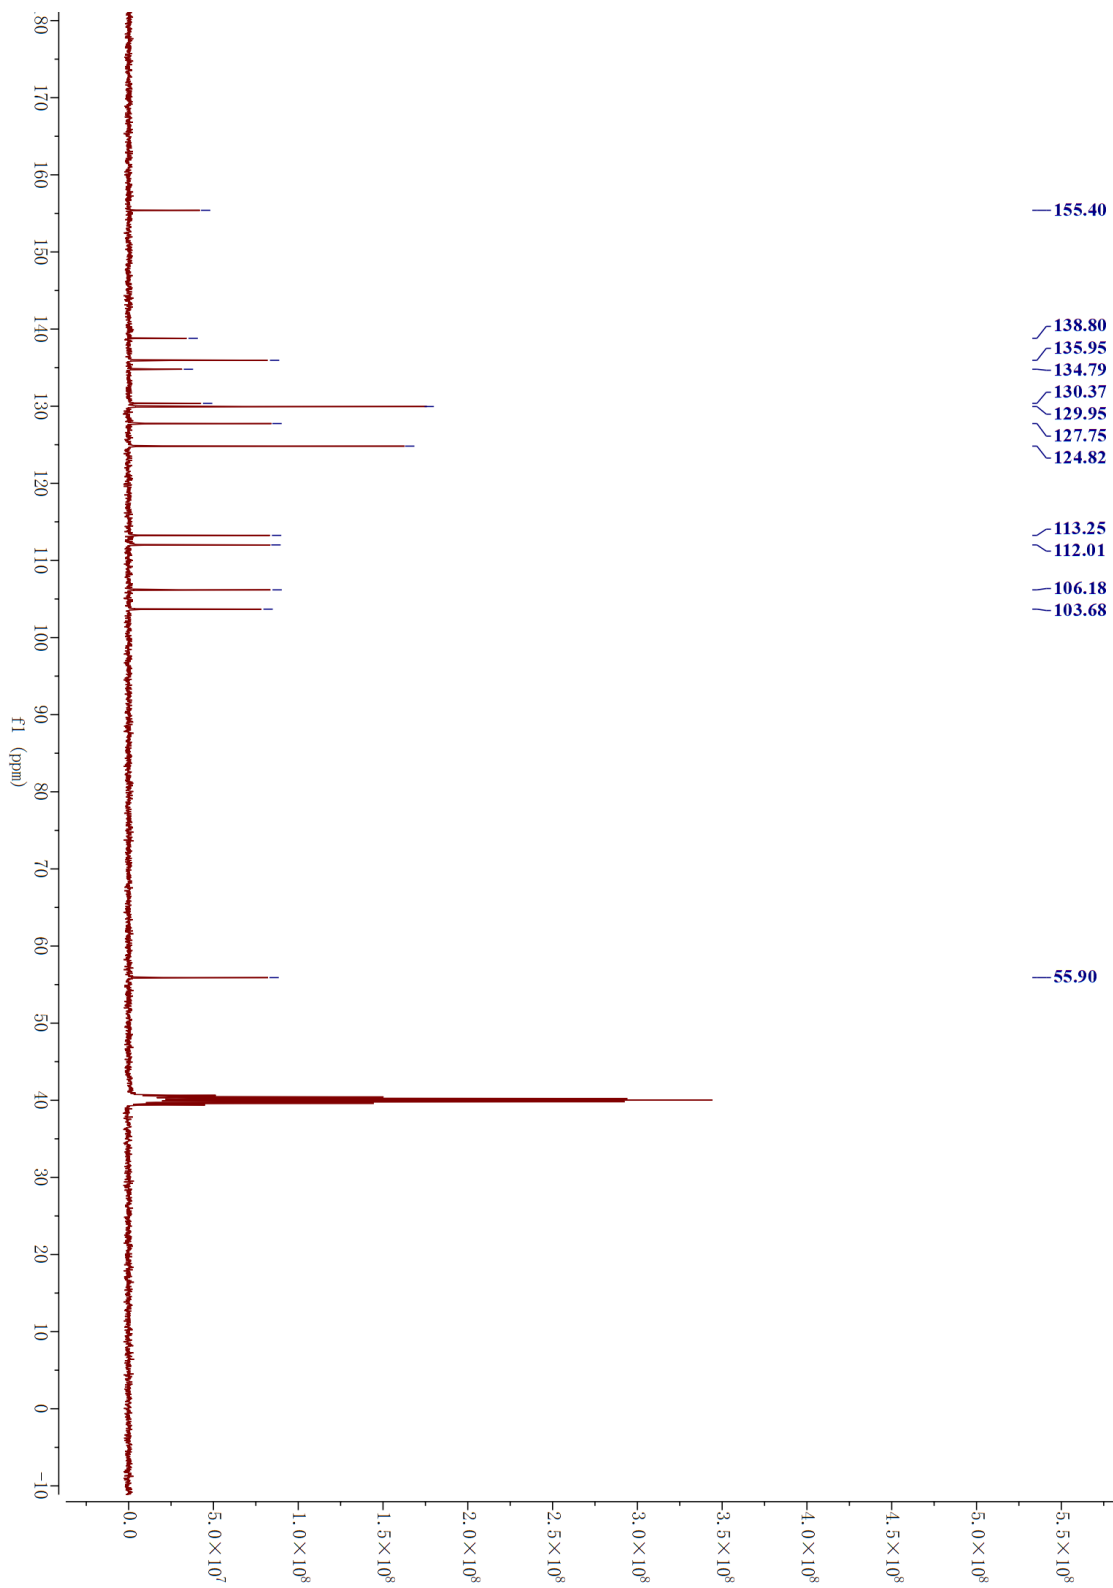

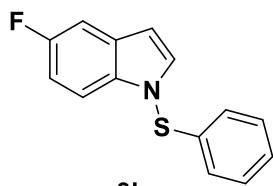

31

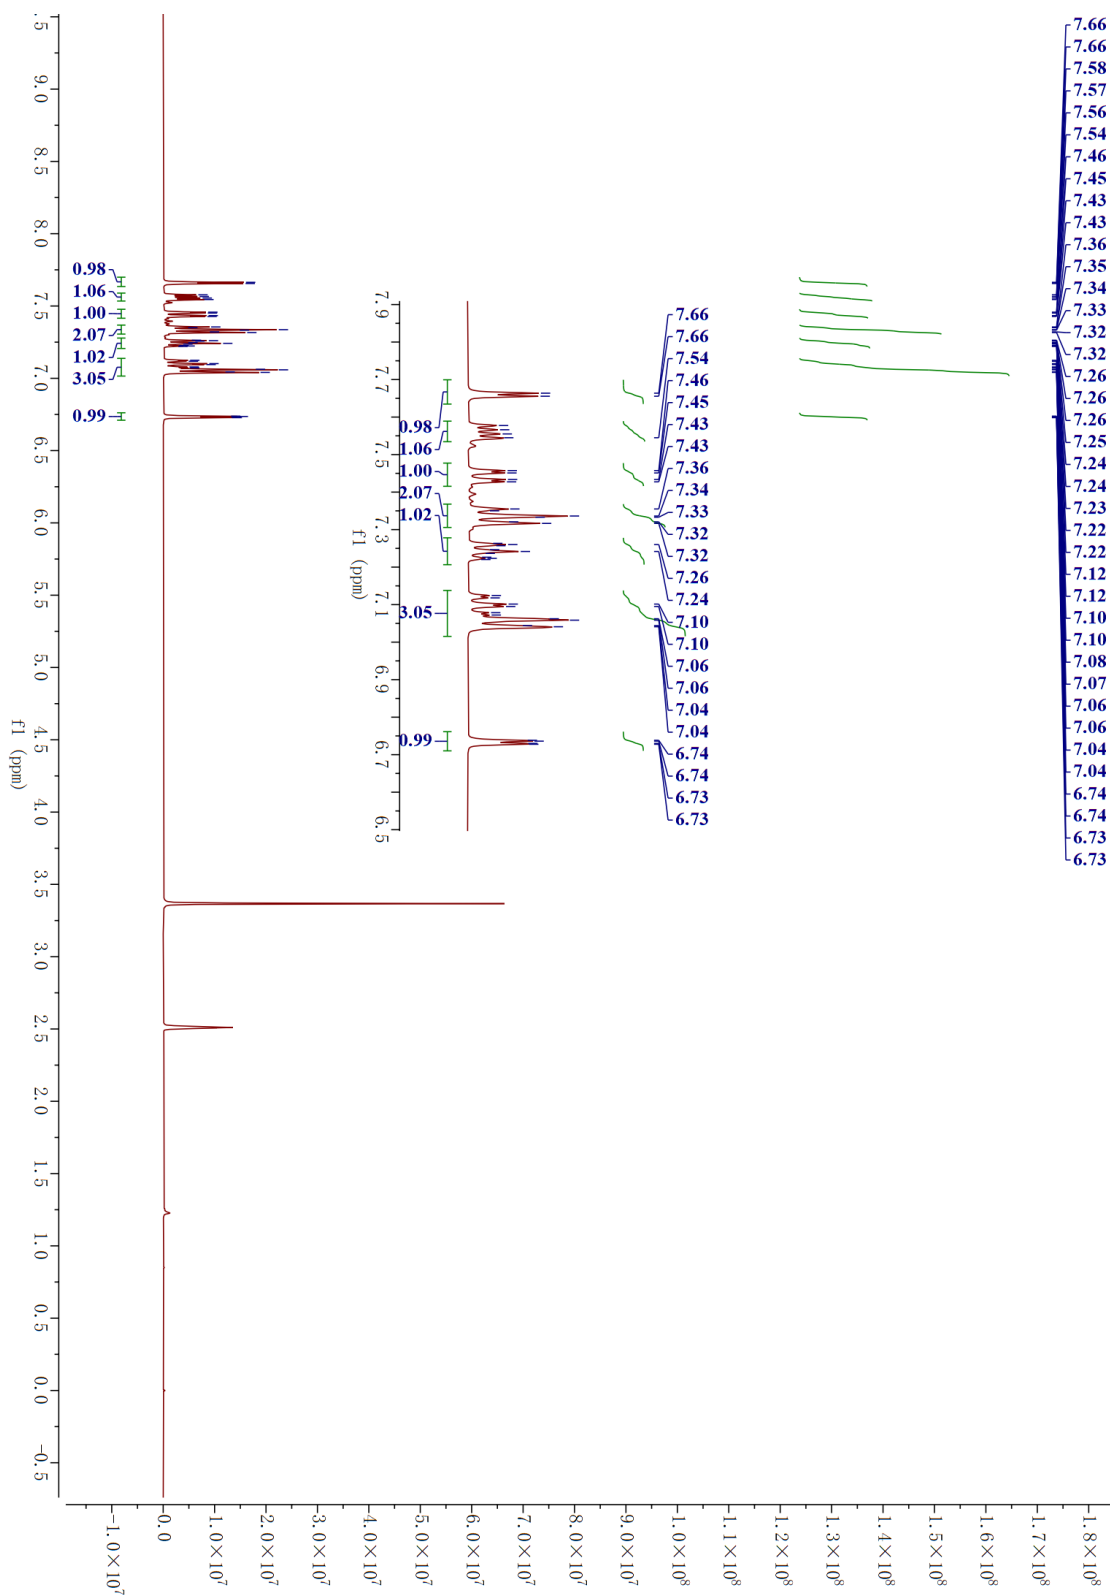

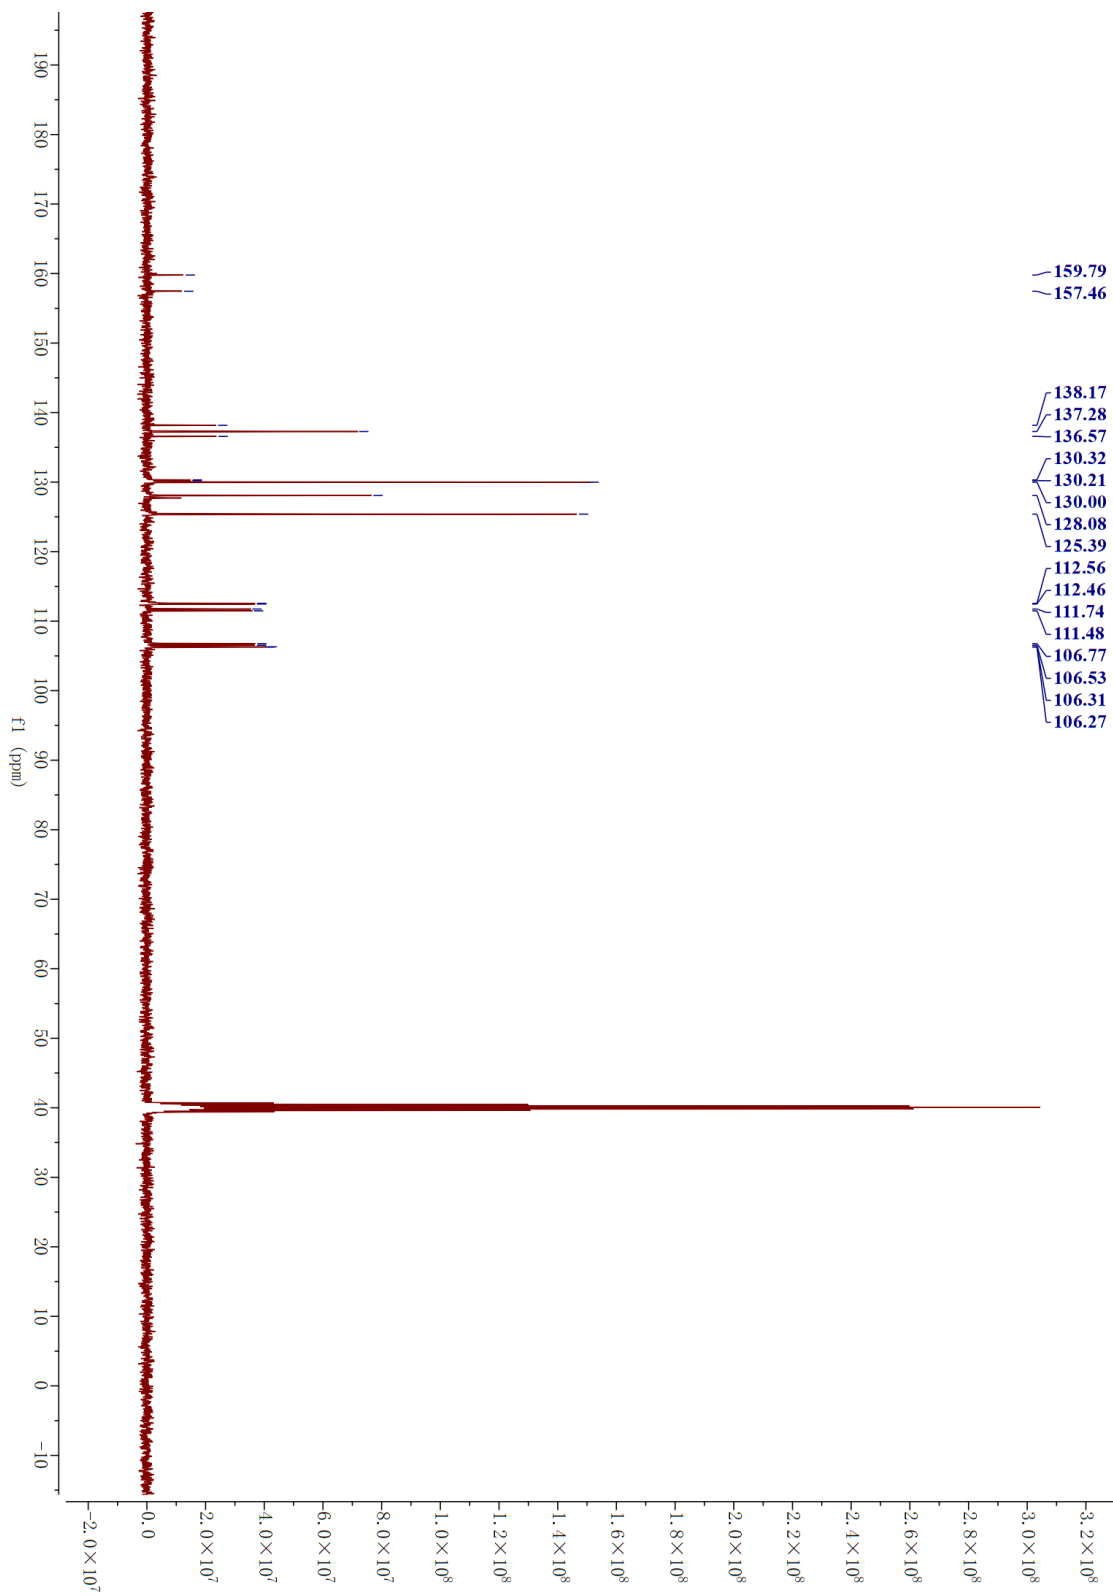



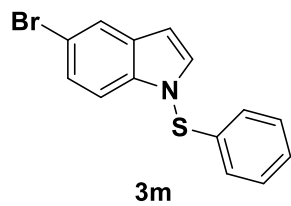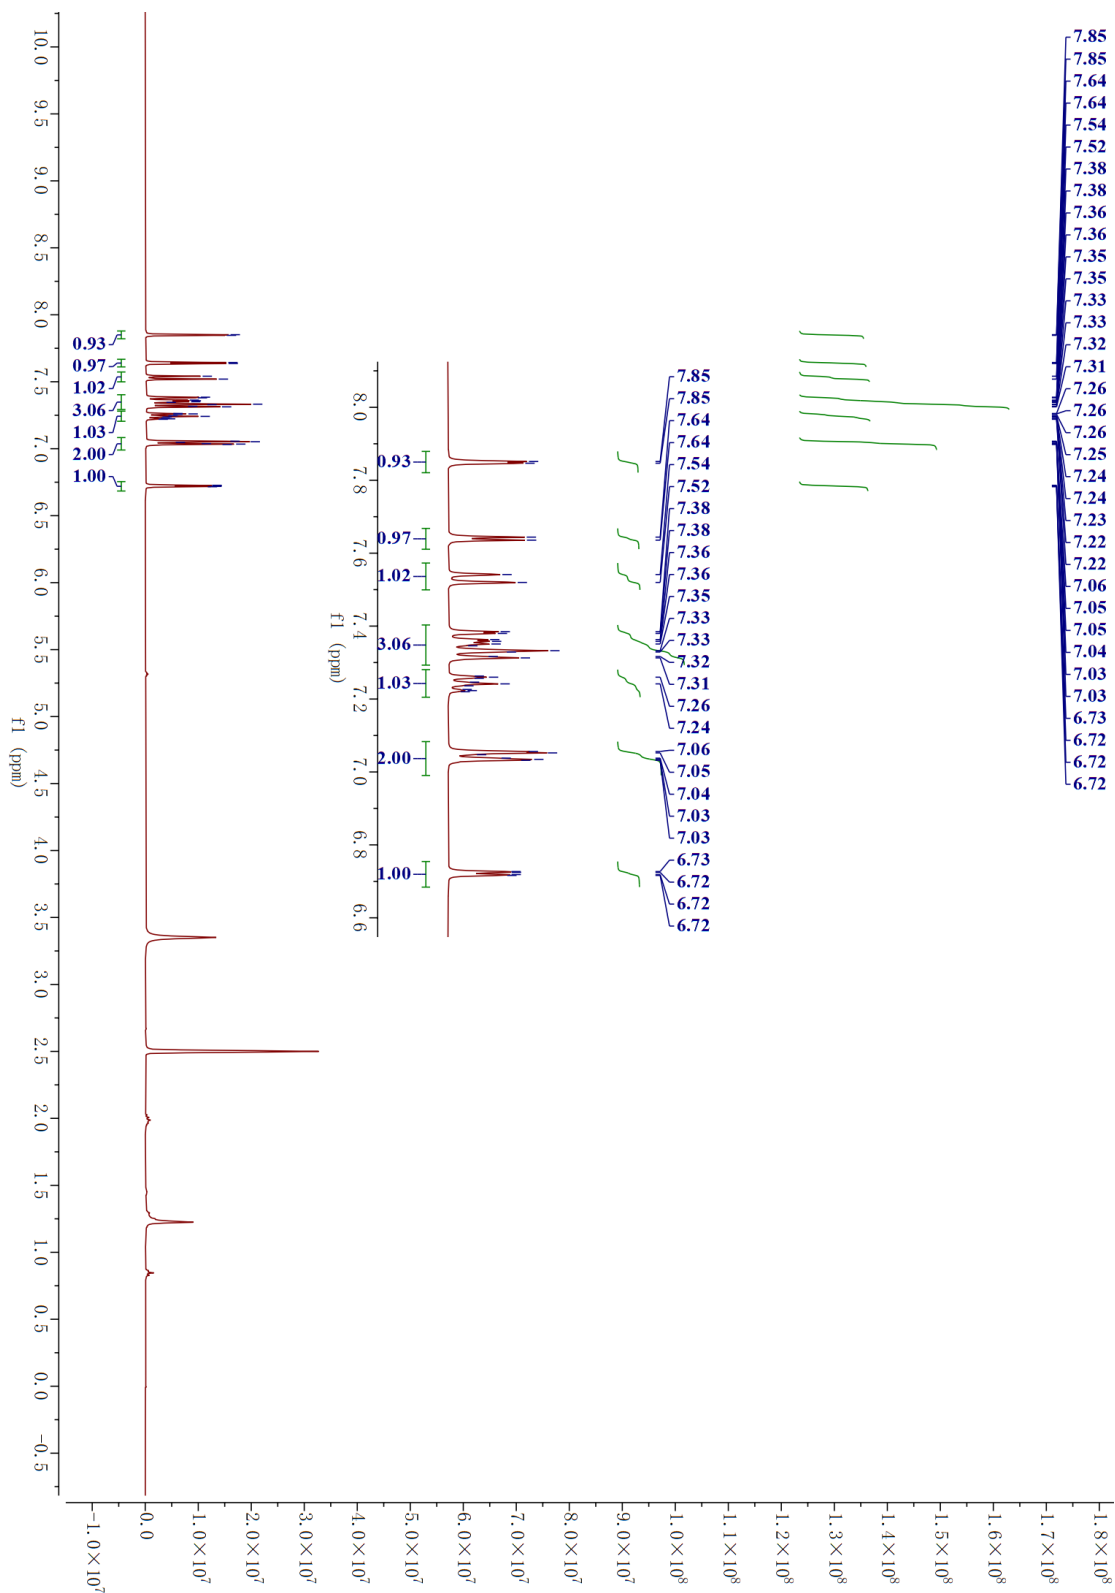

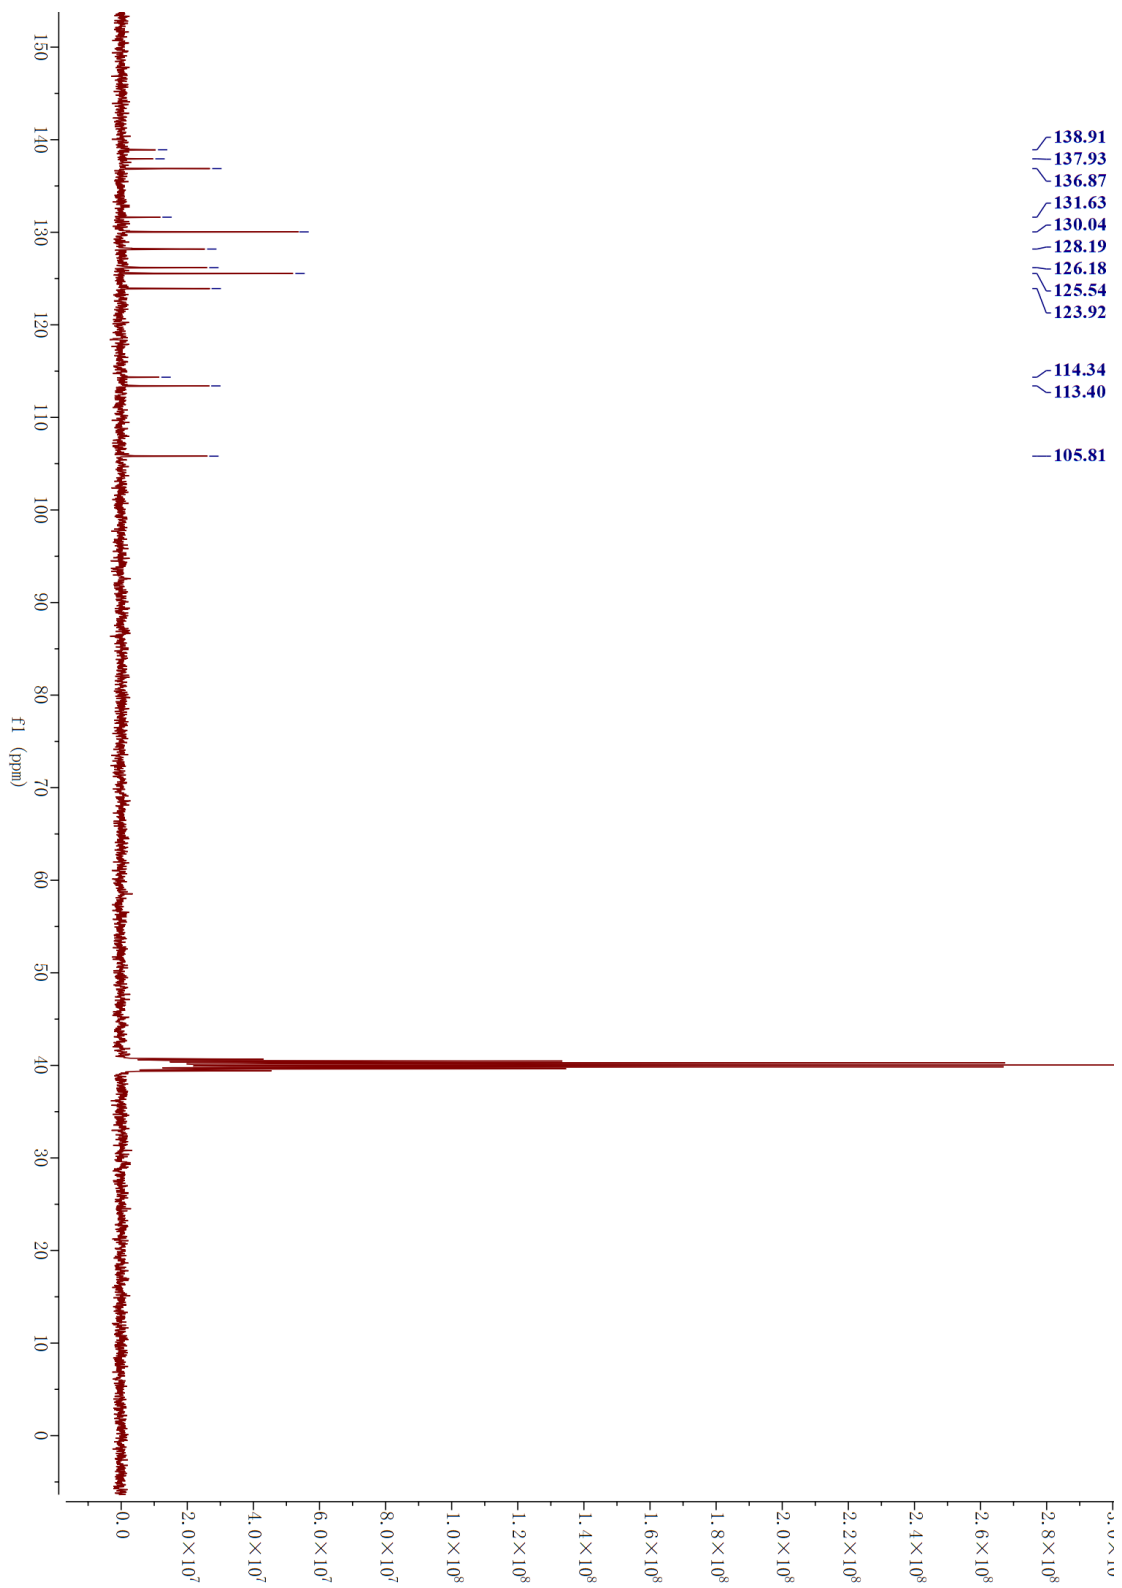

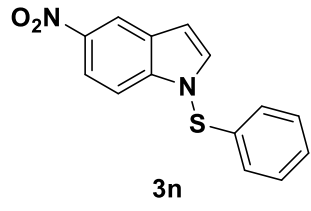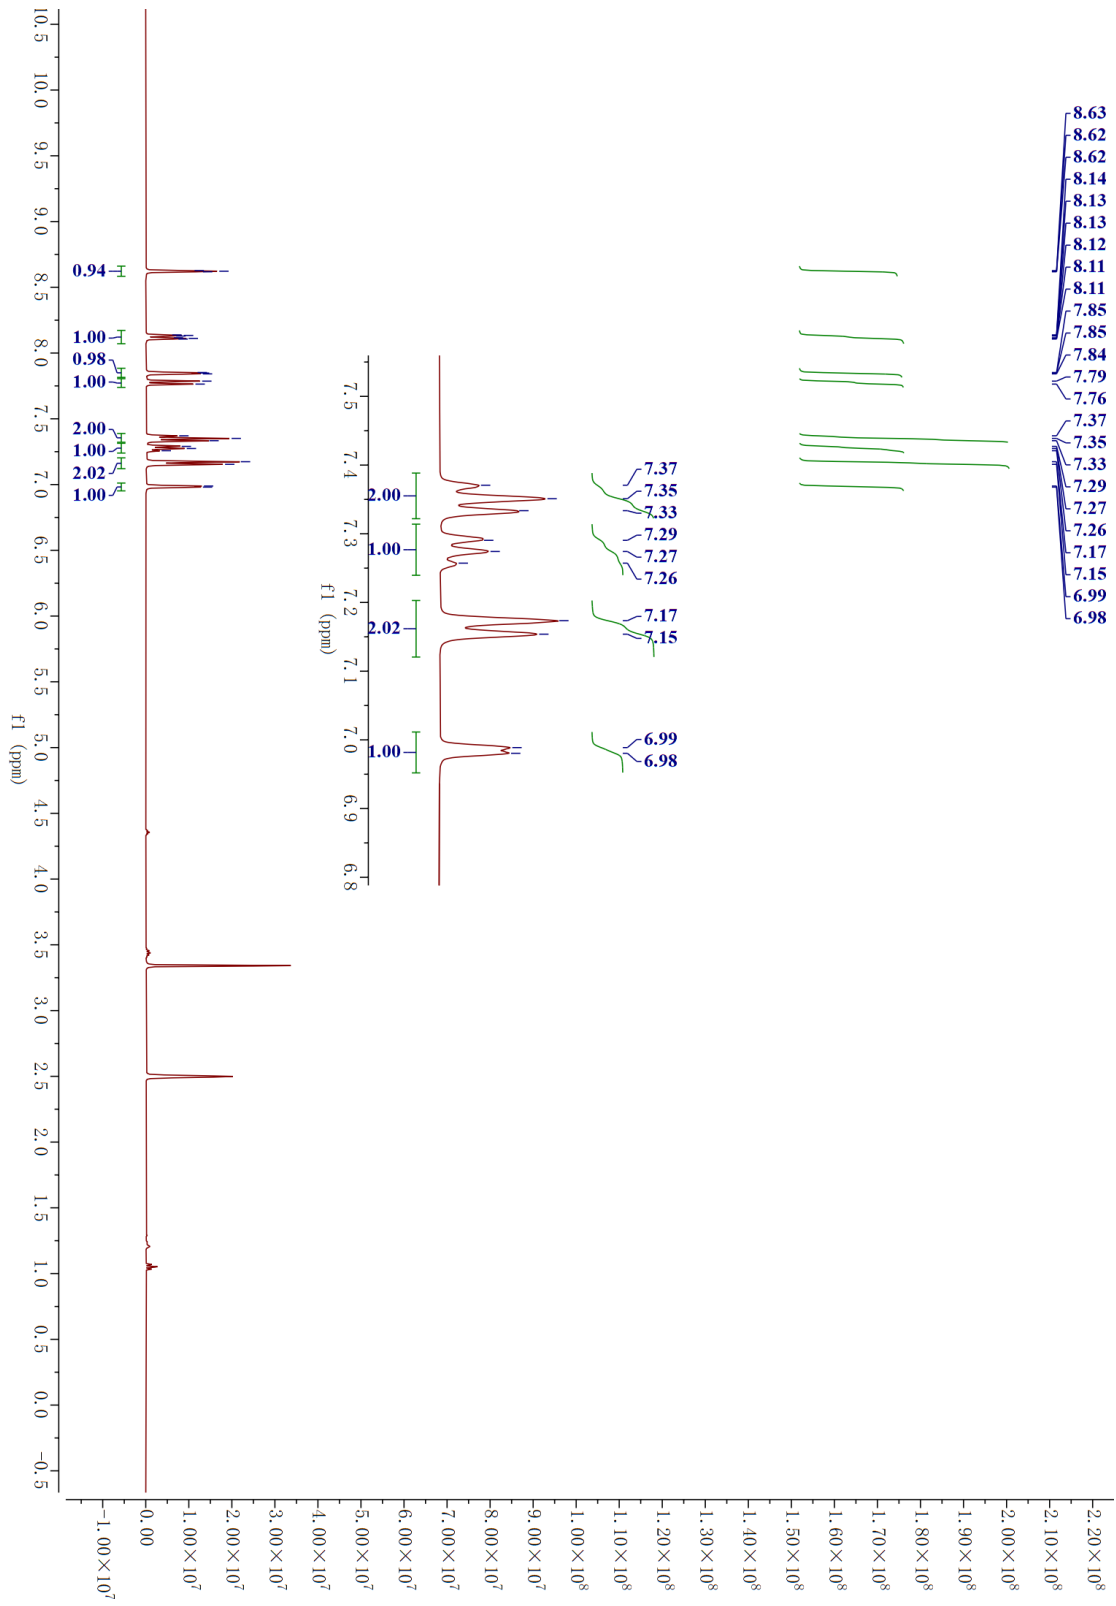

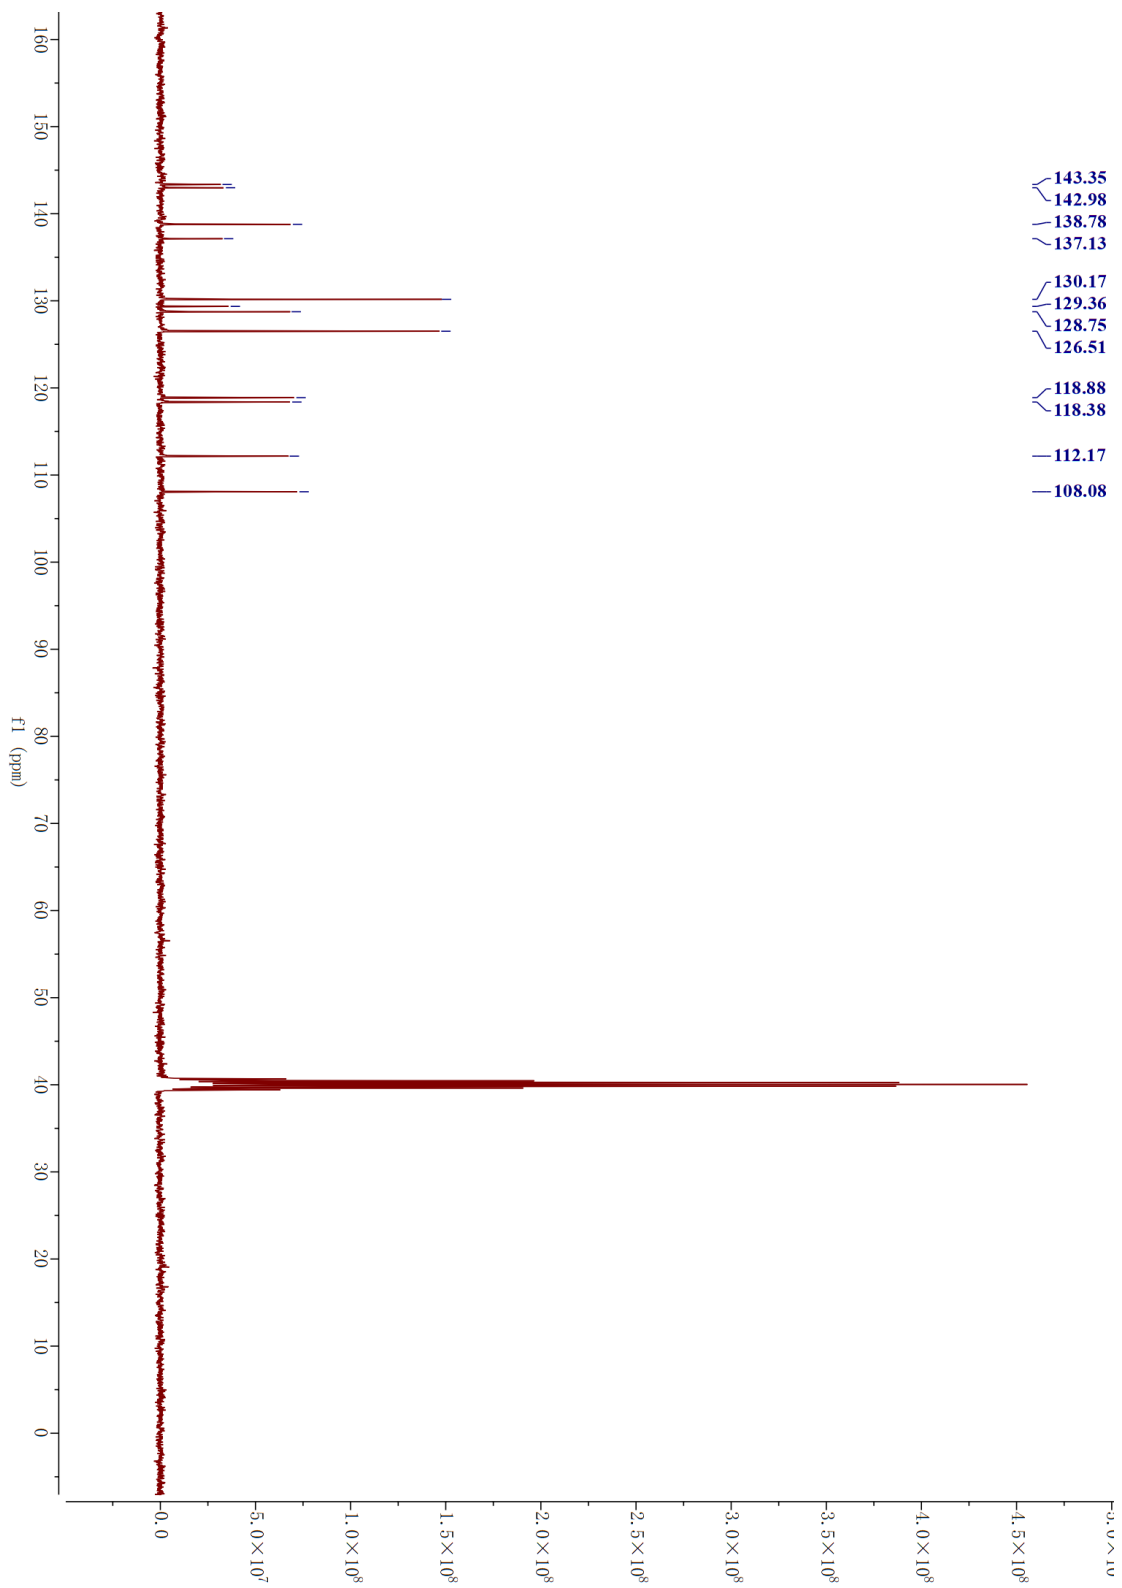

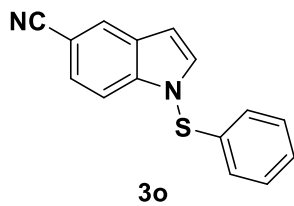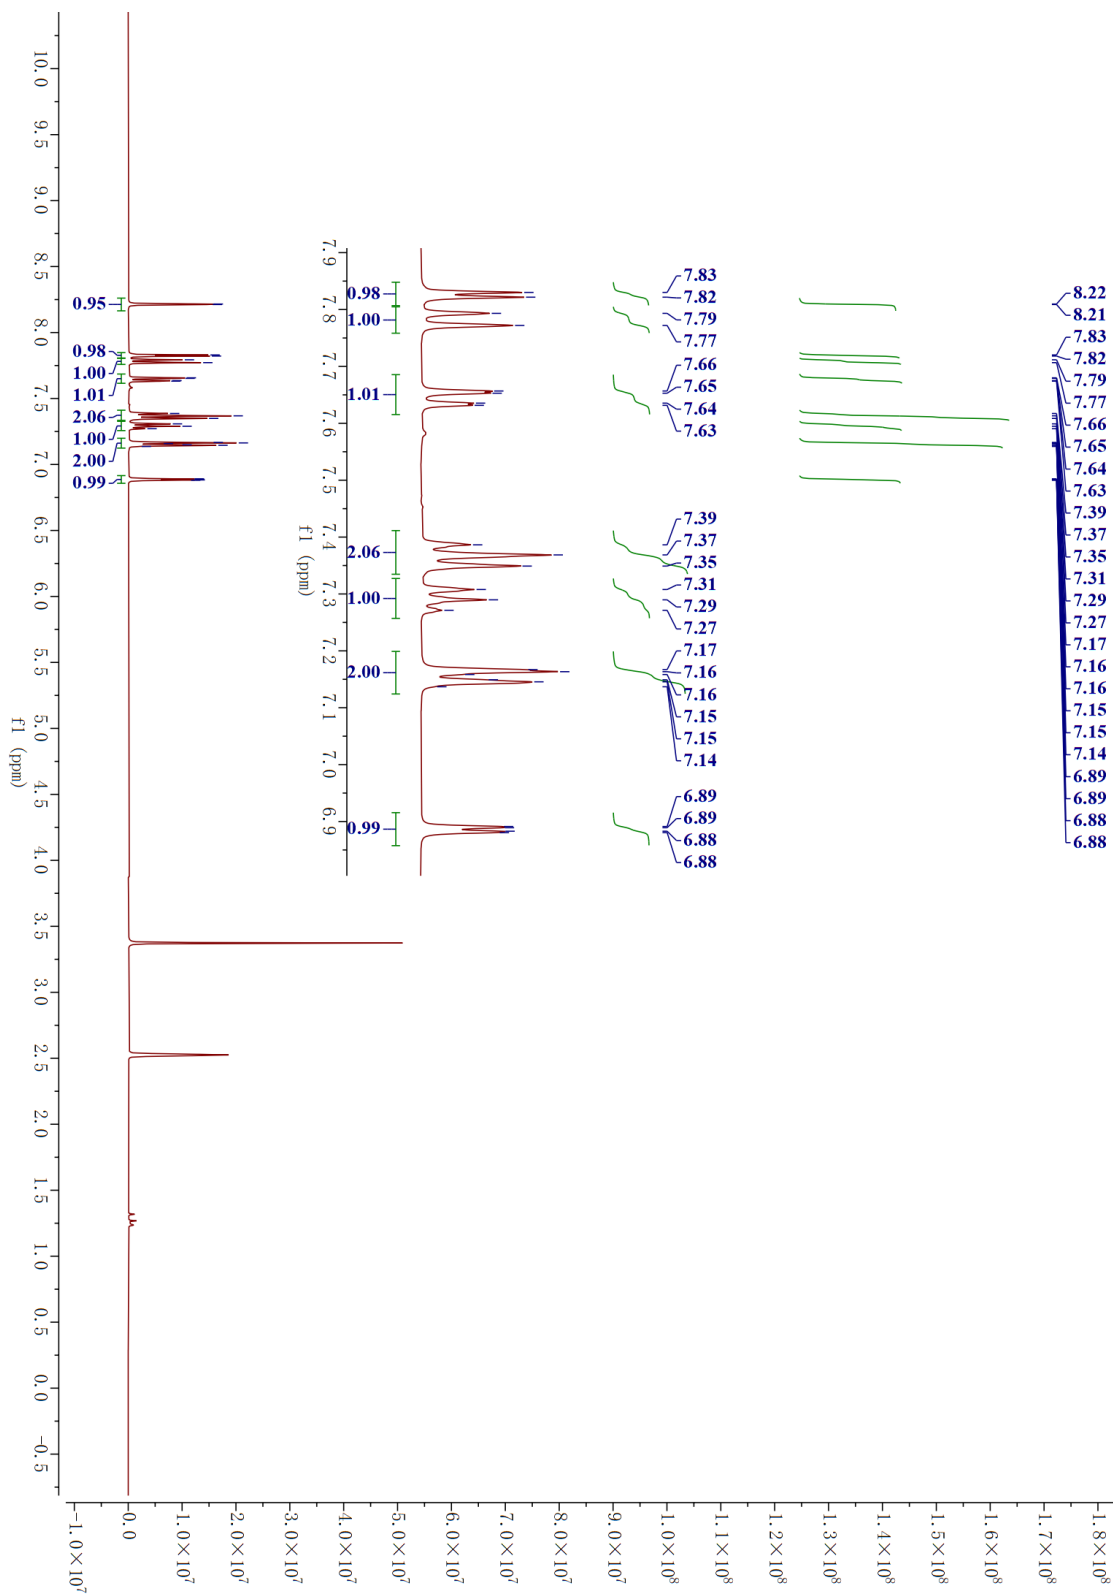

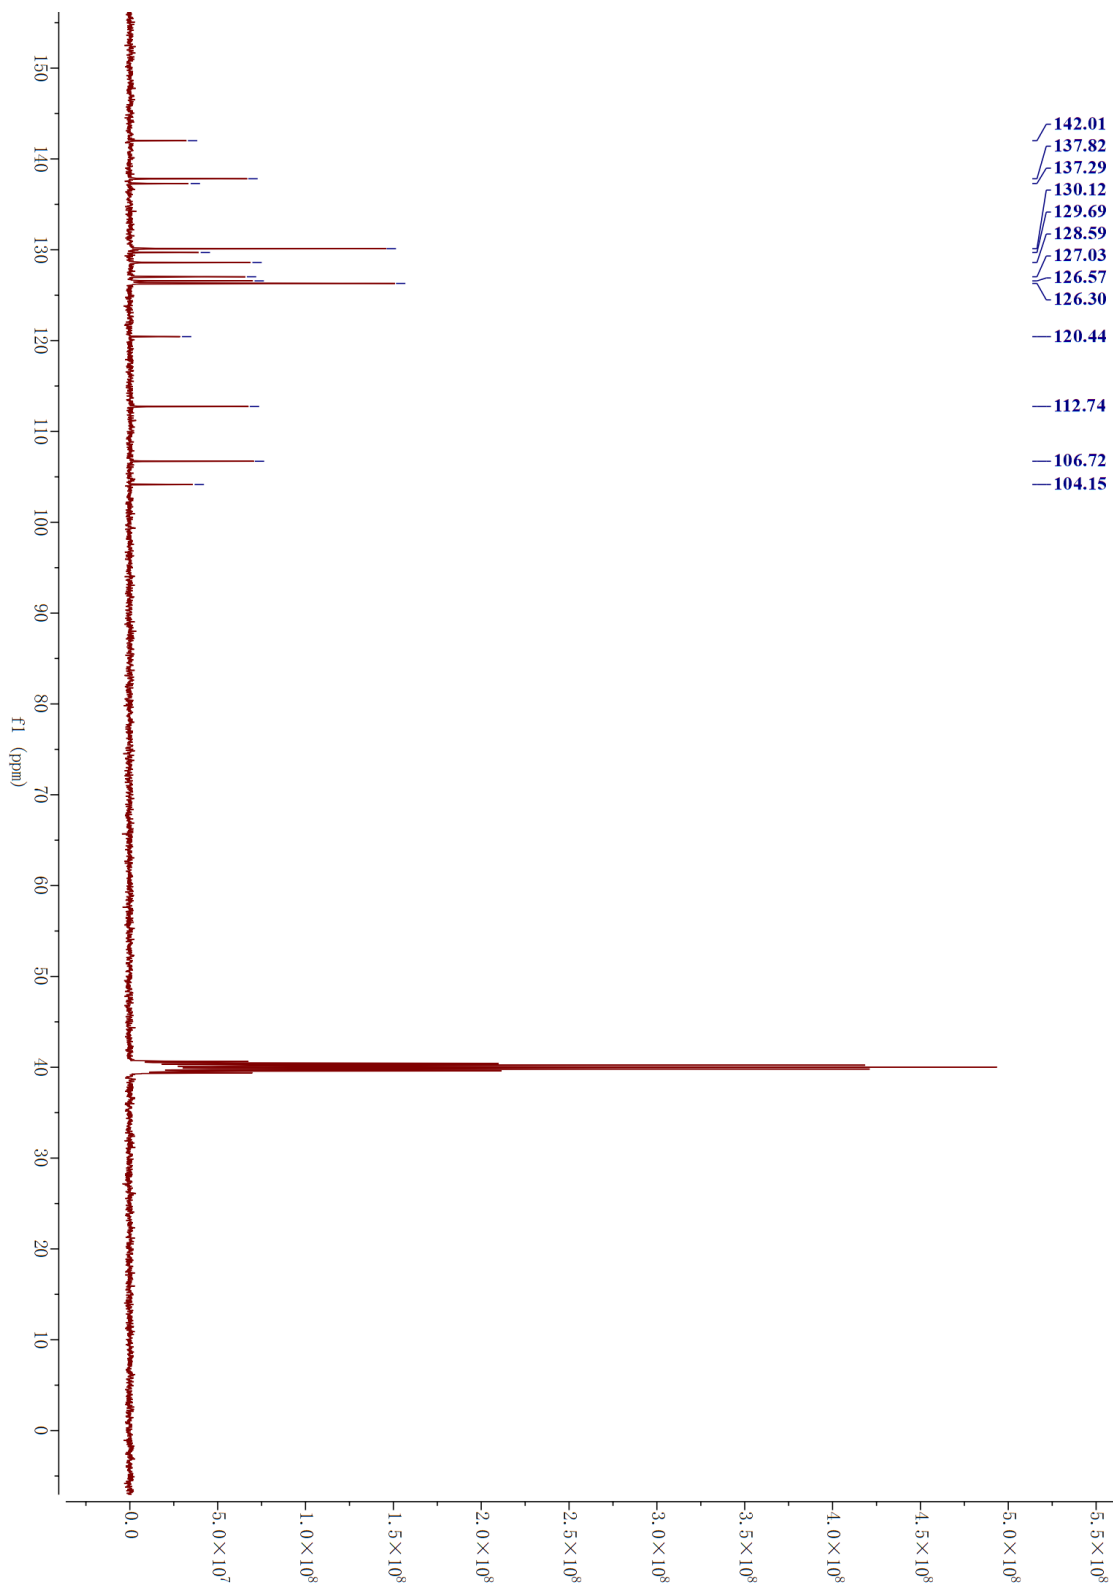

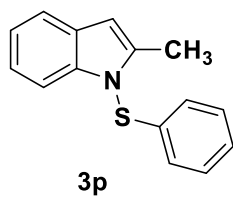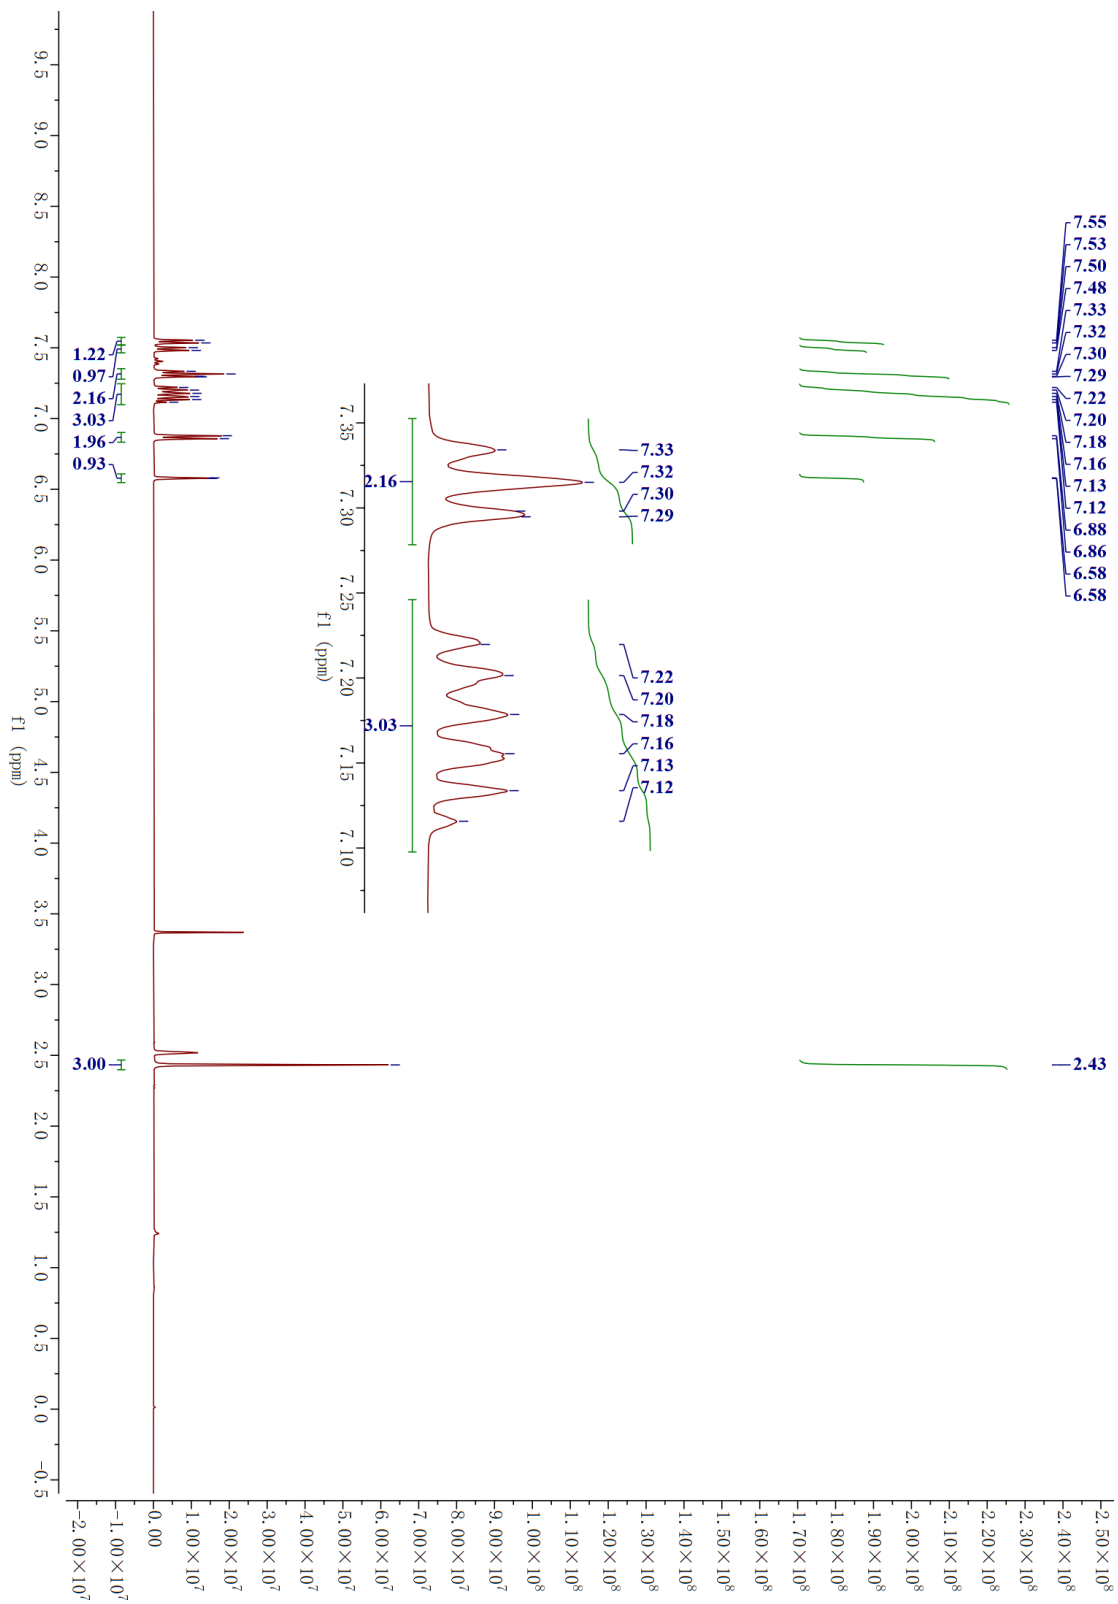

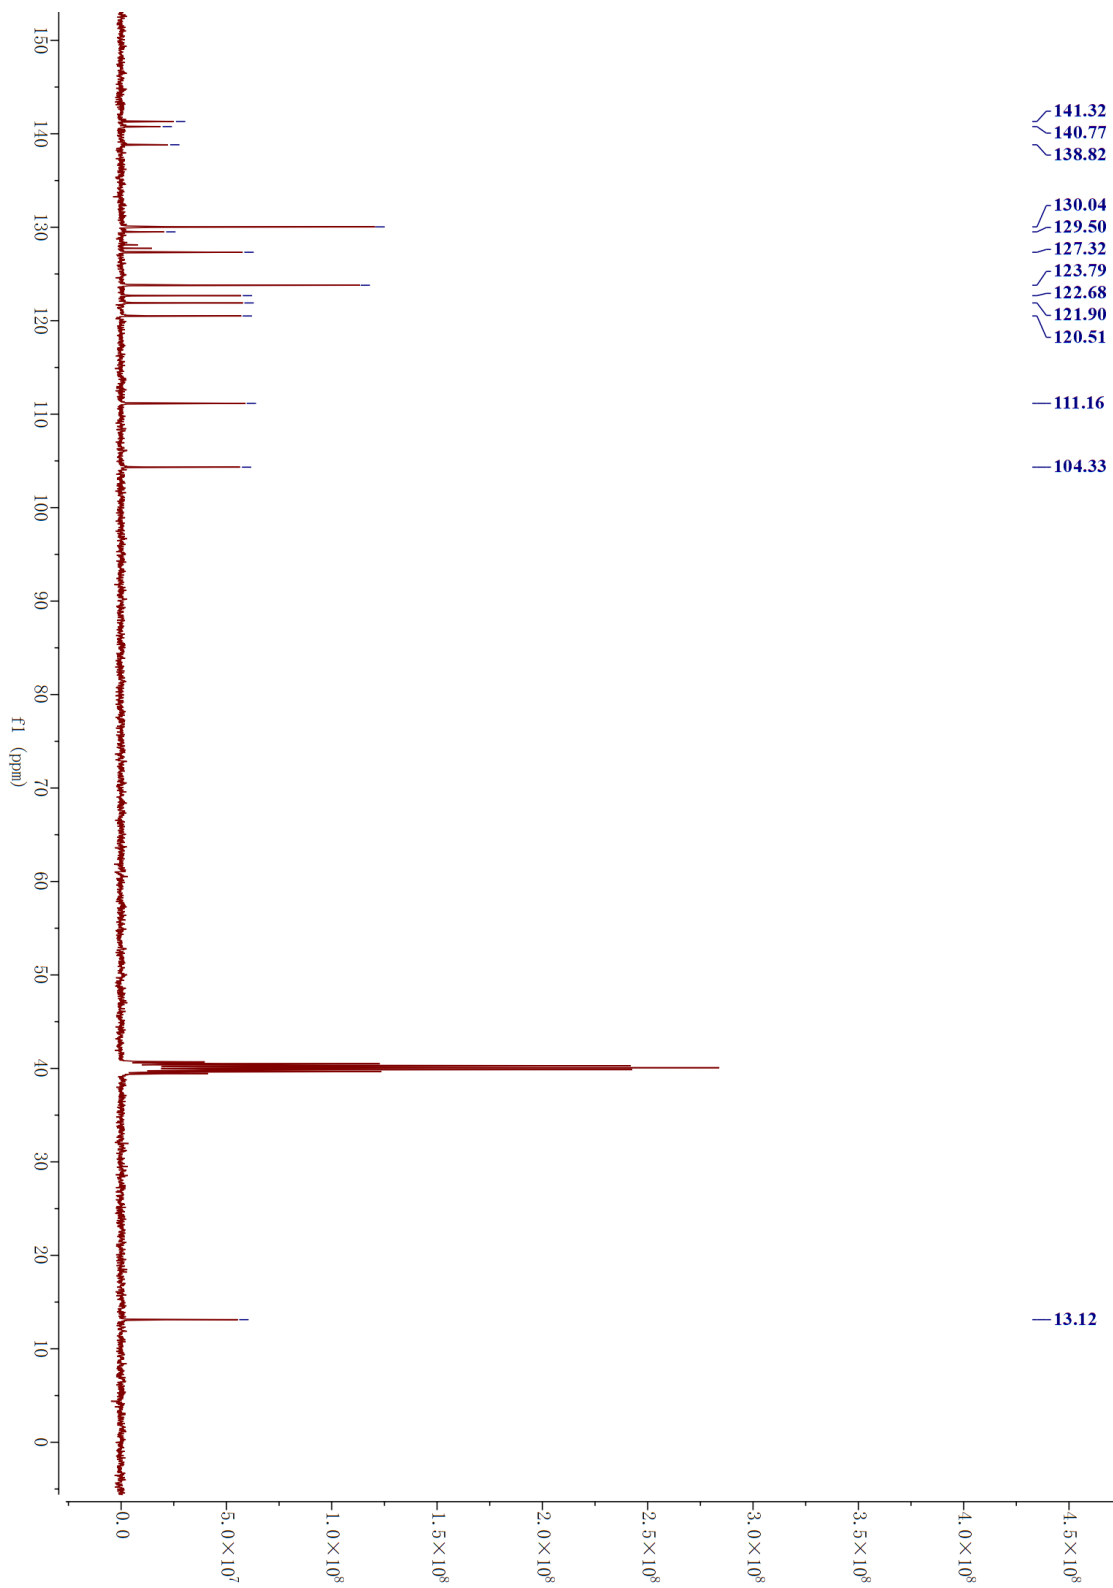



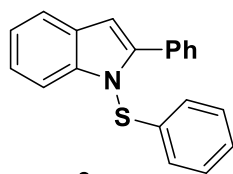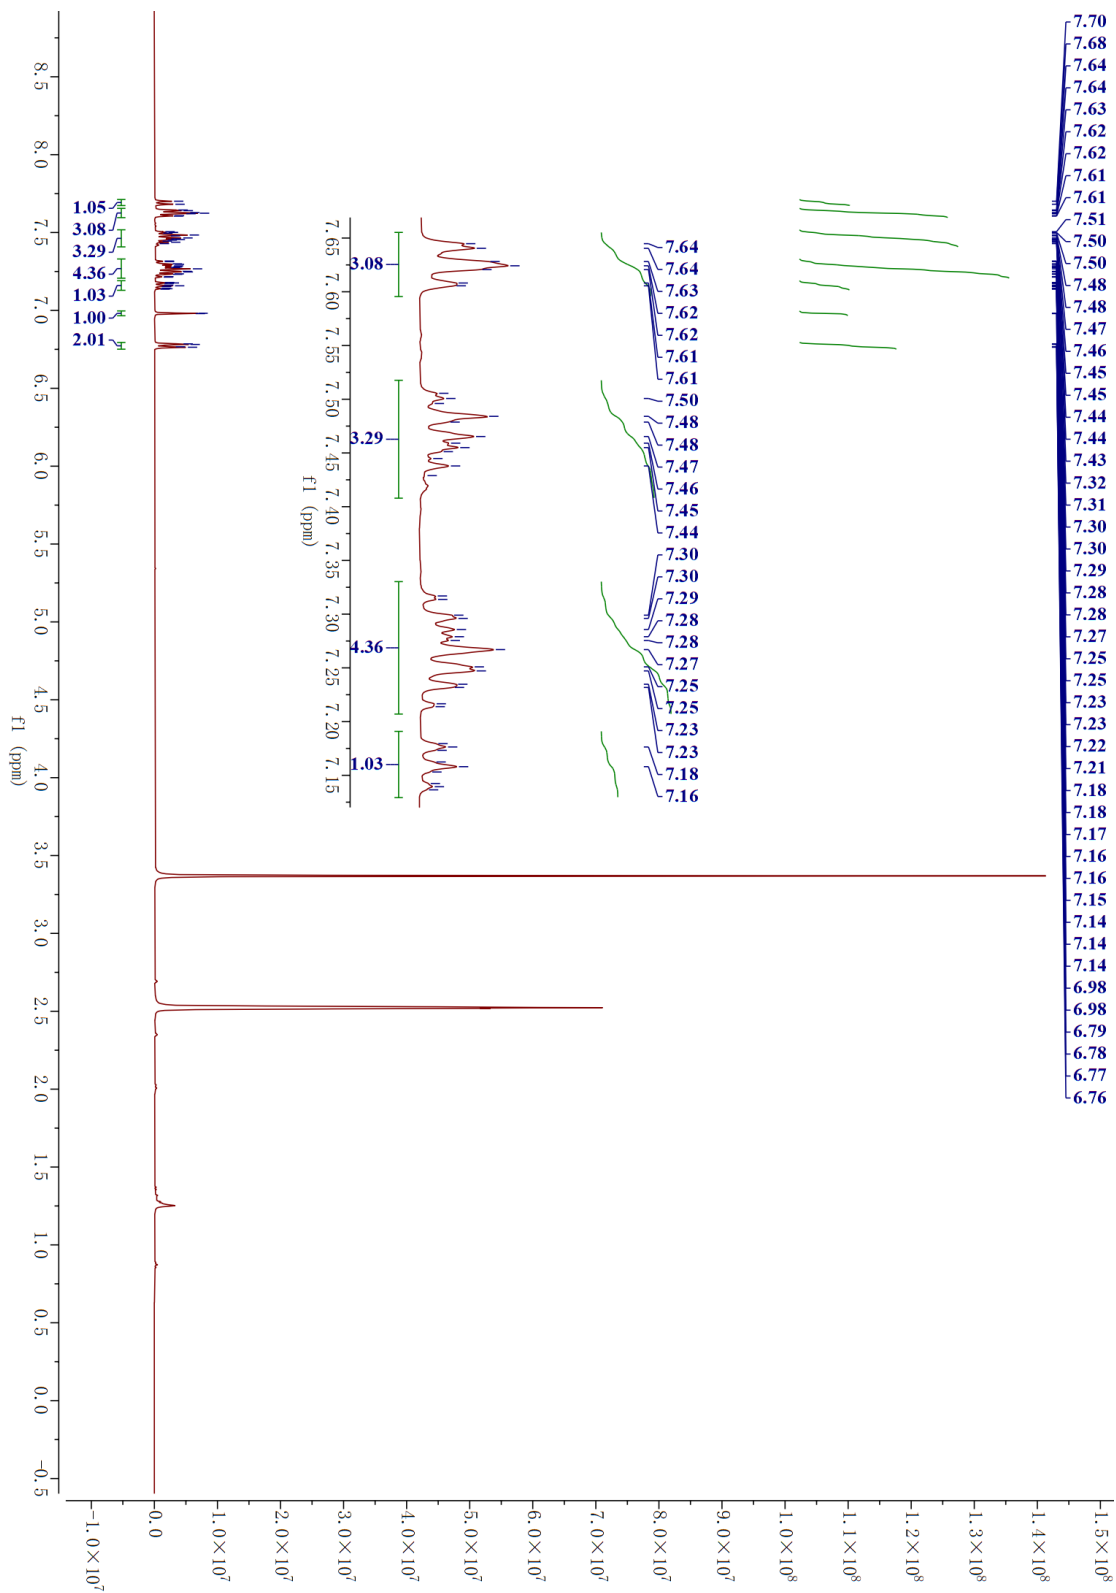

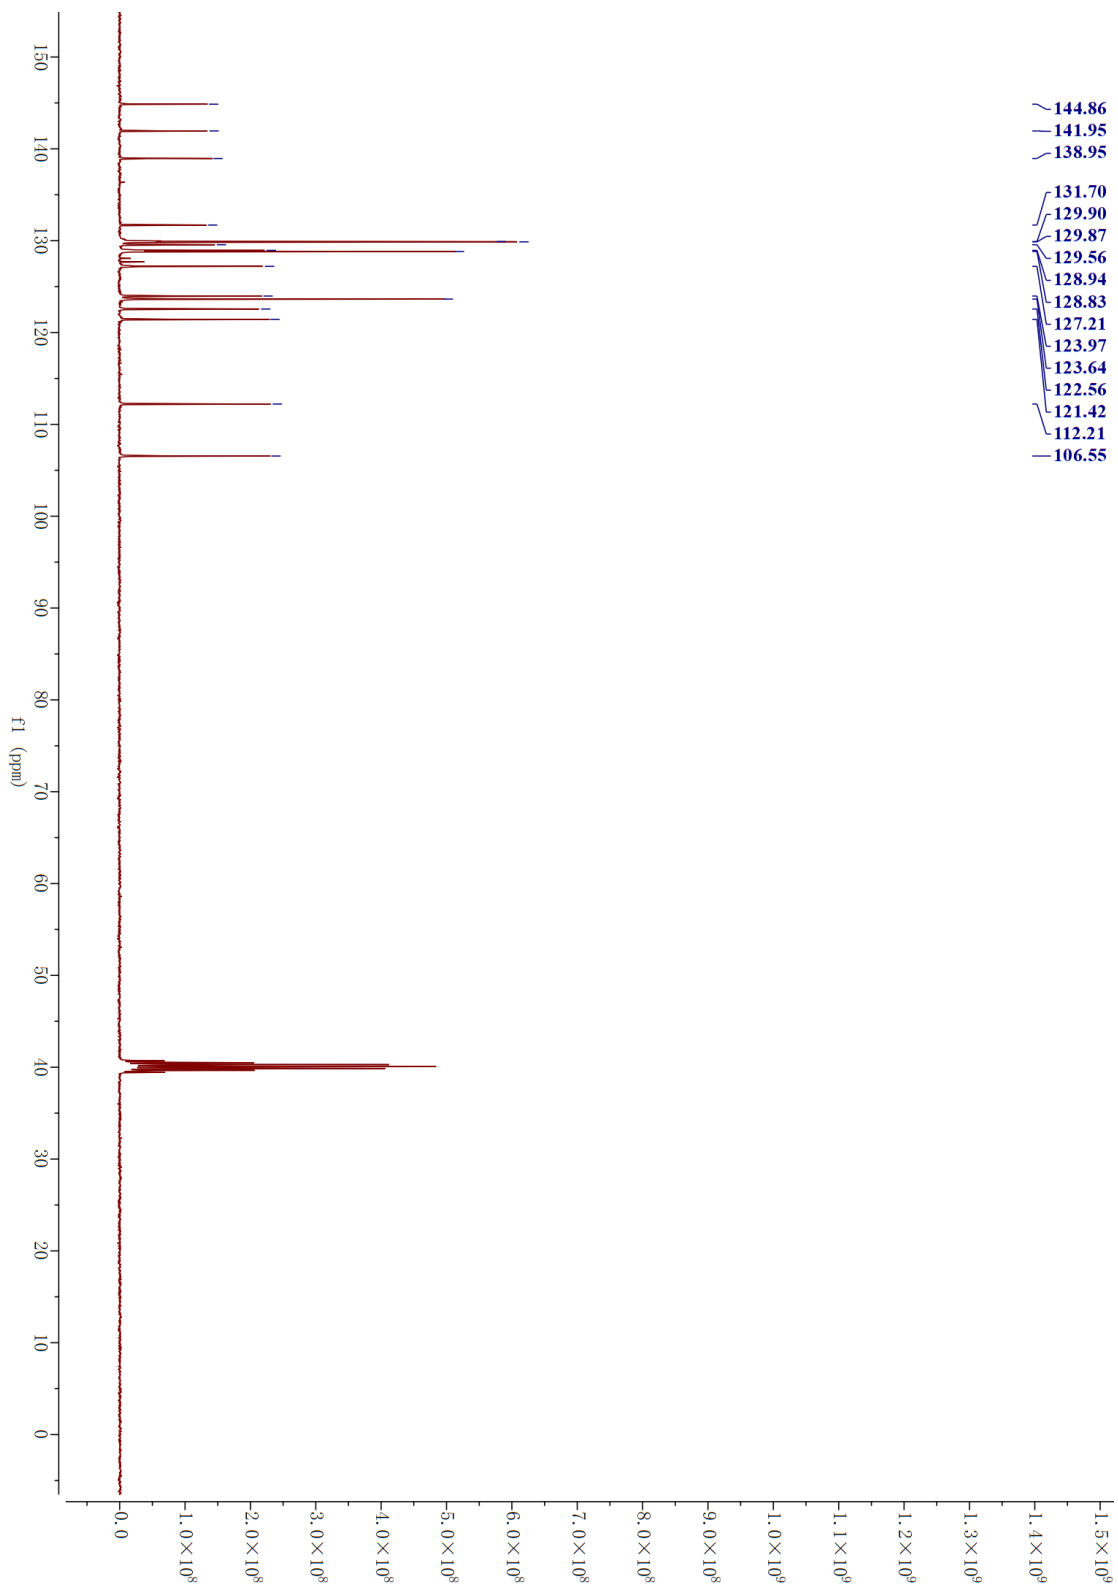

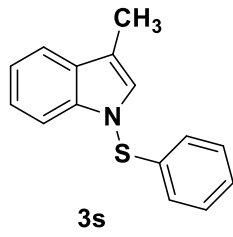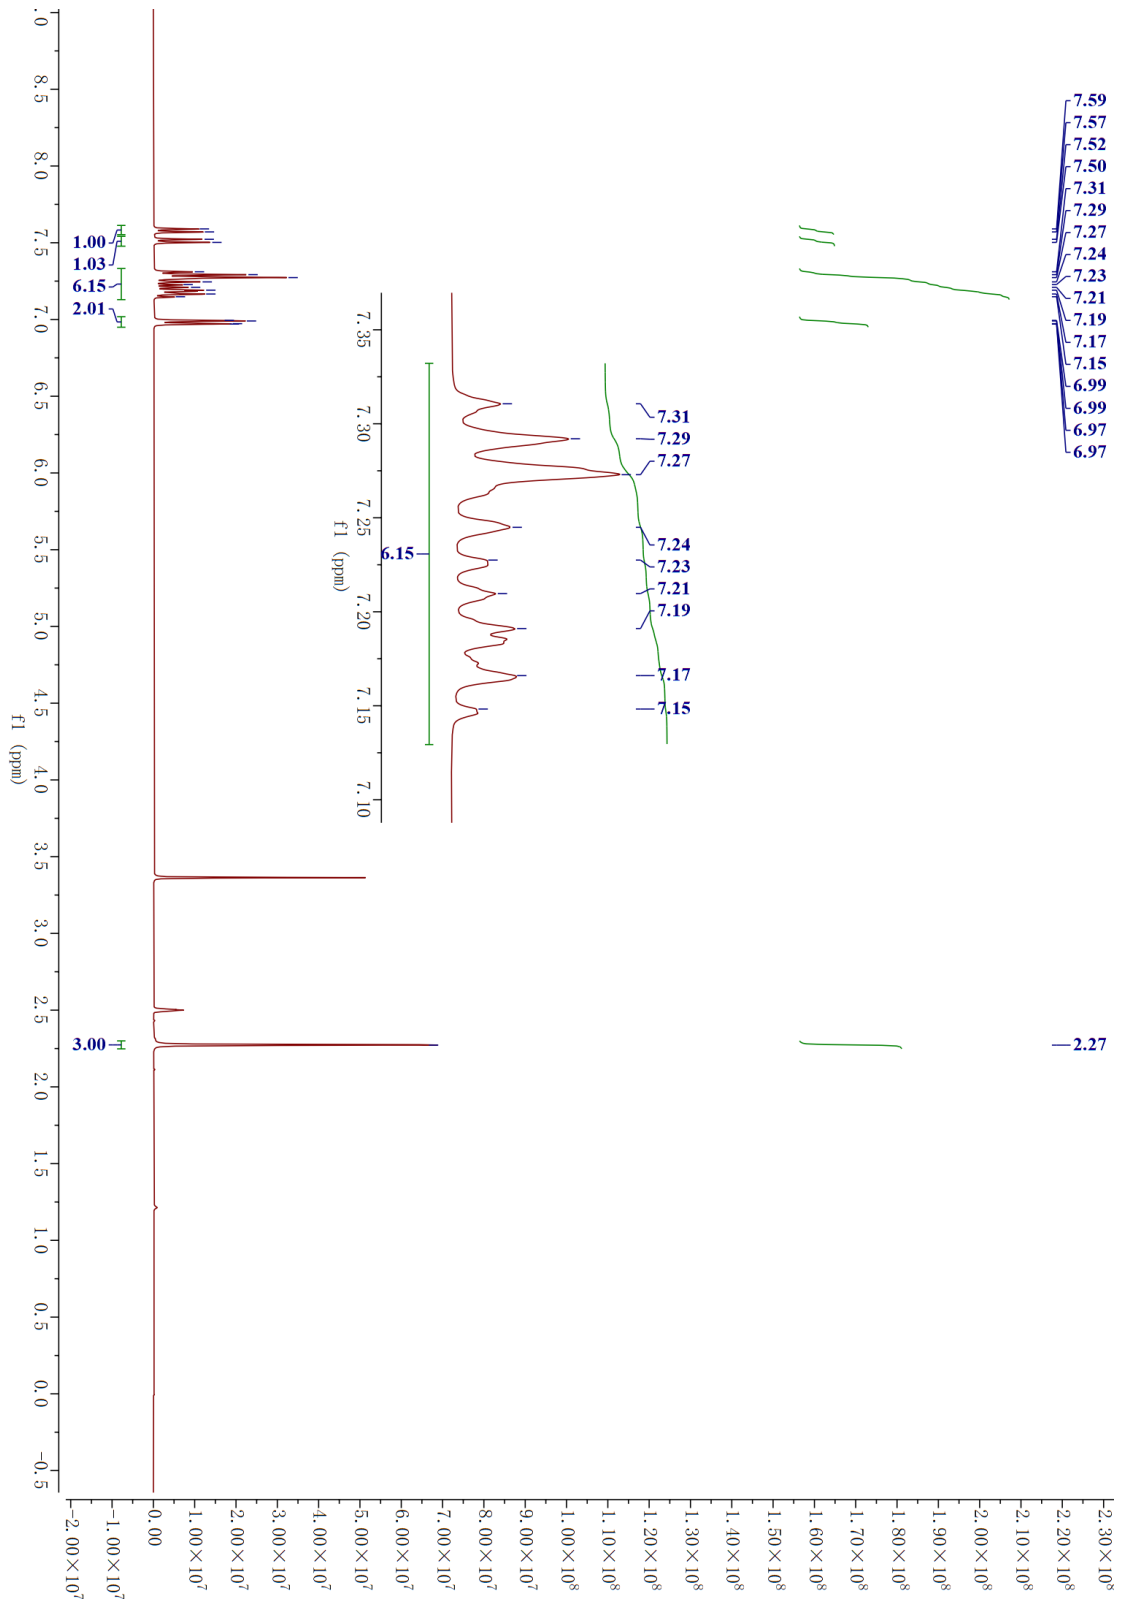

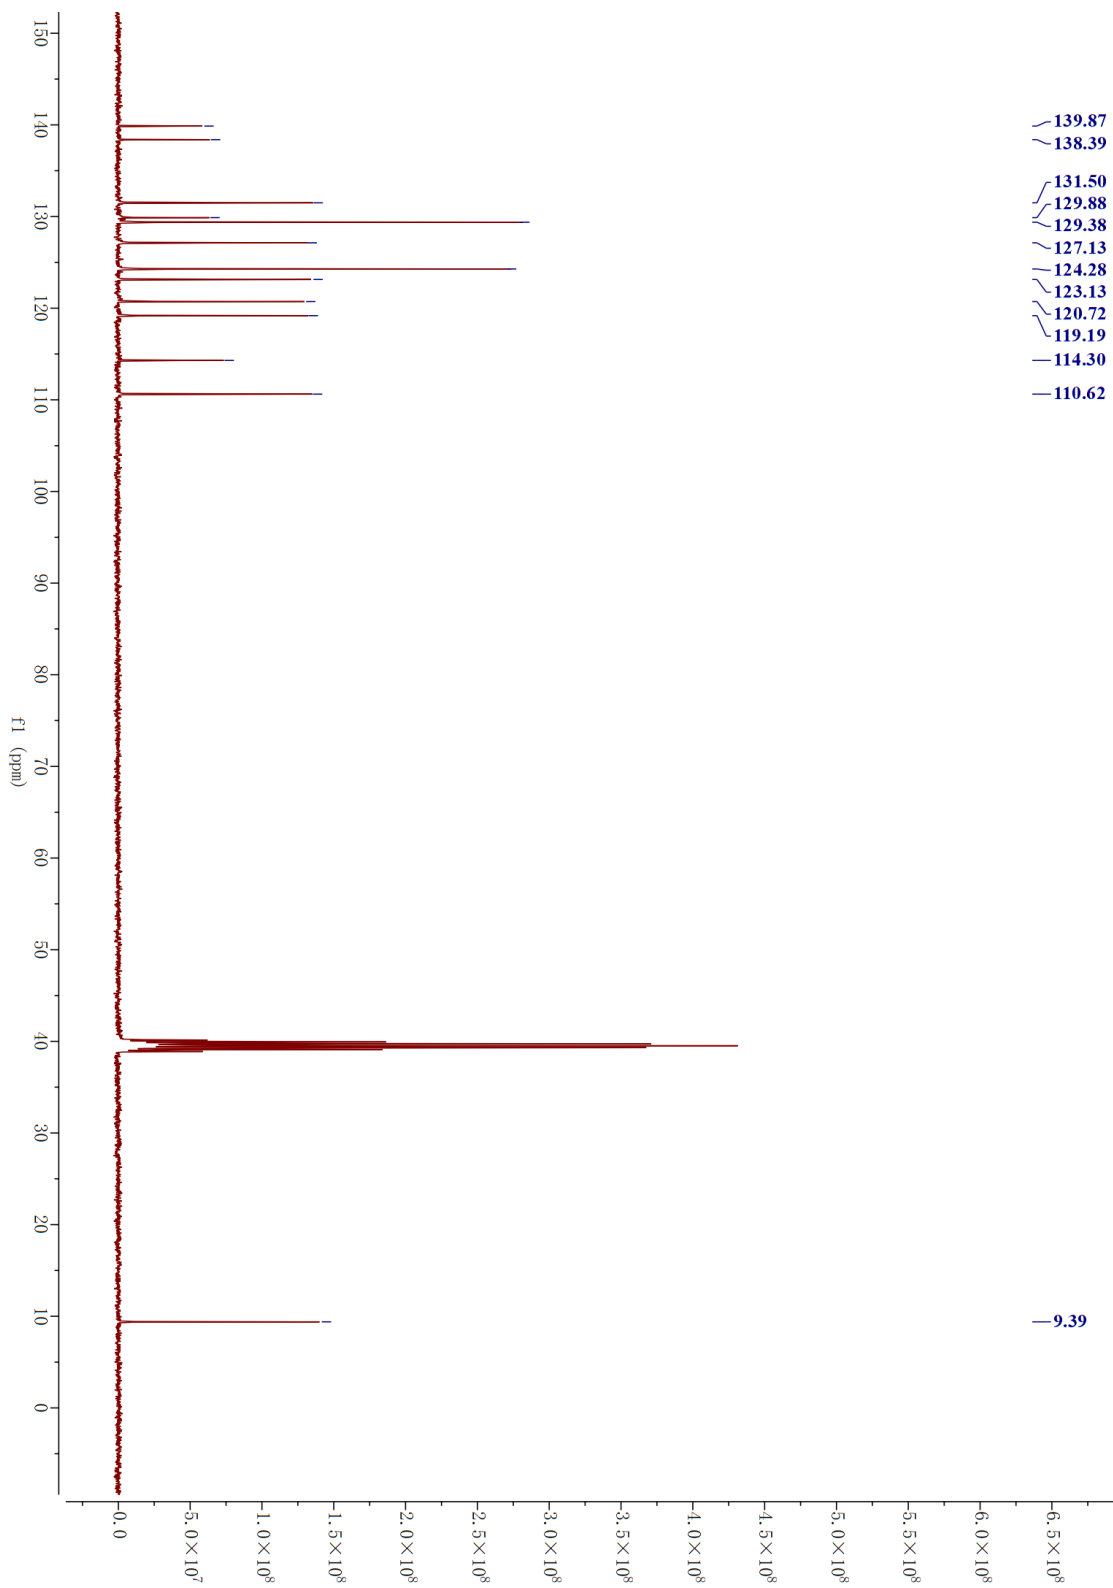

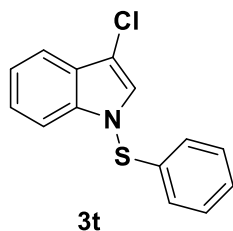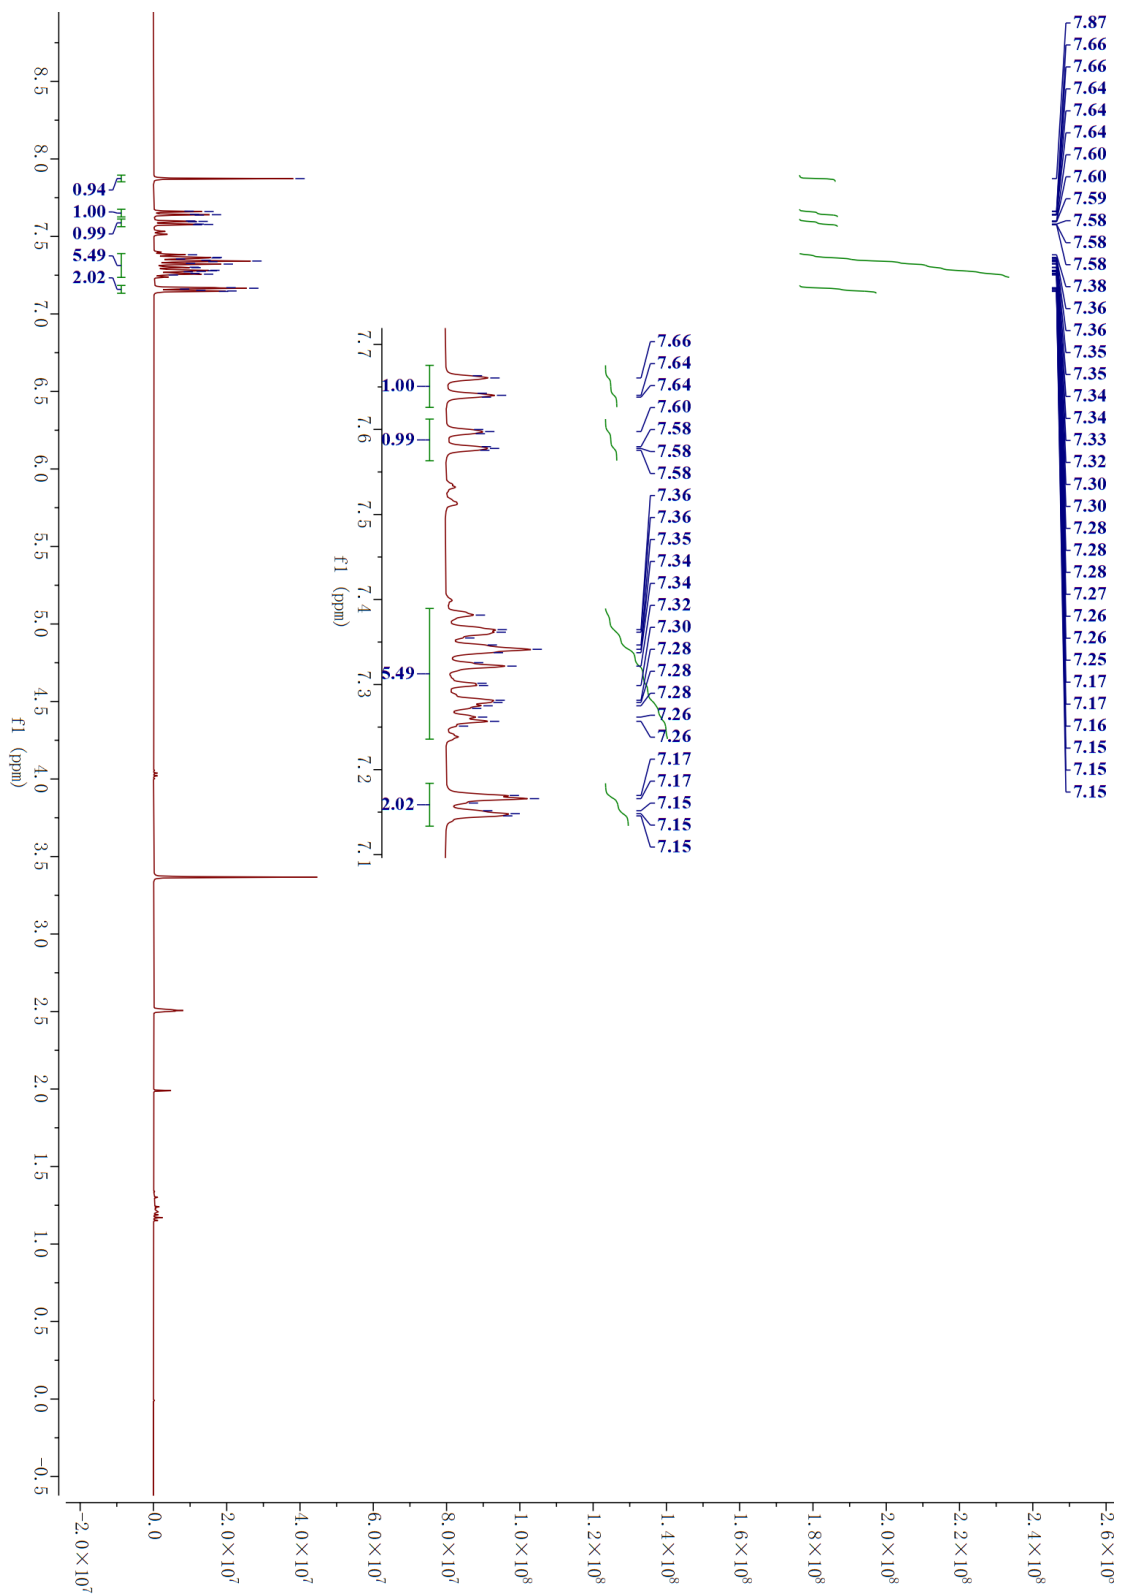

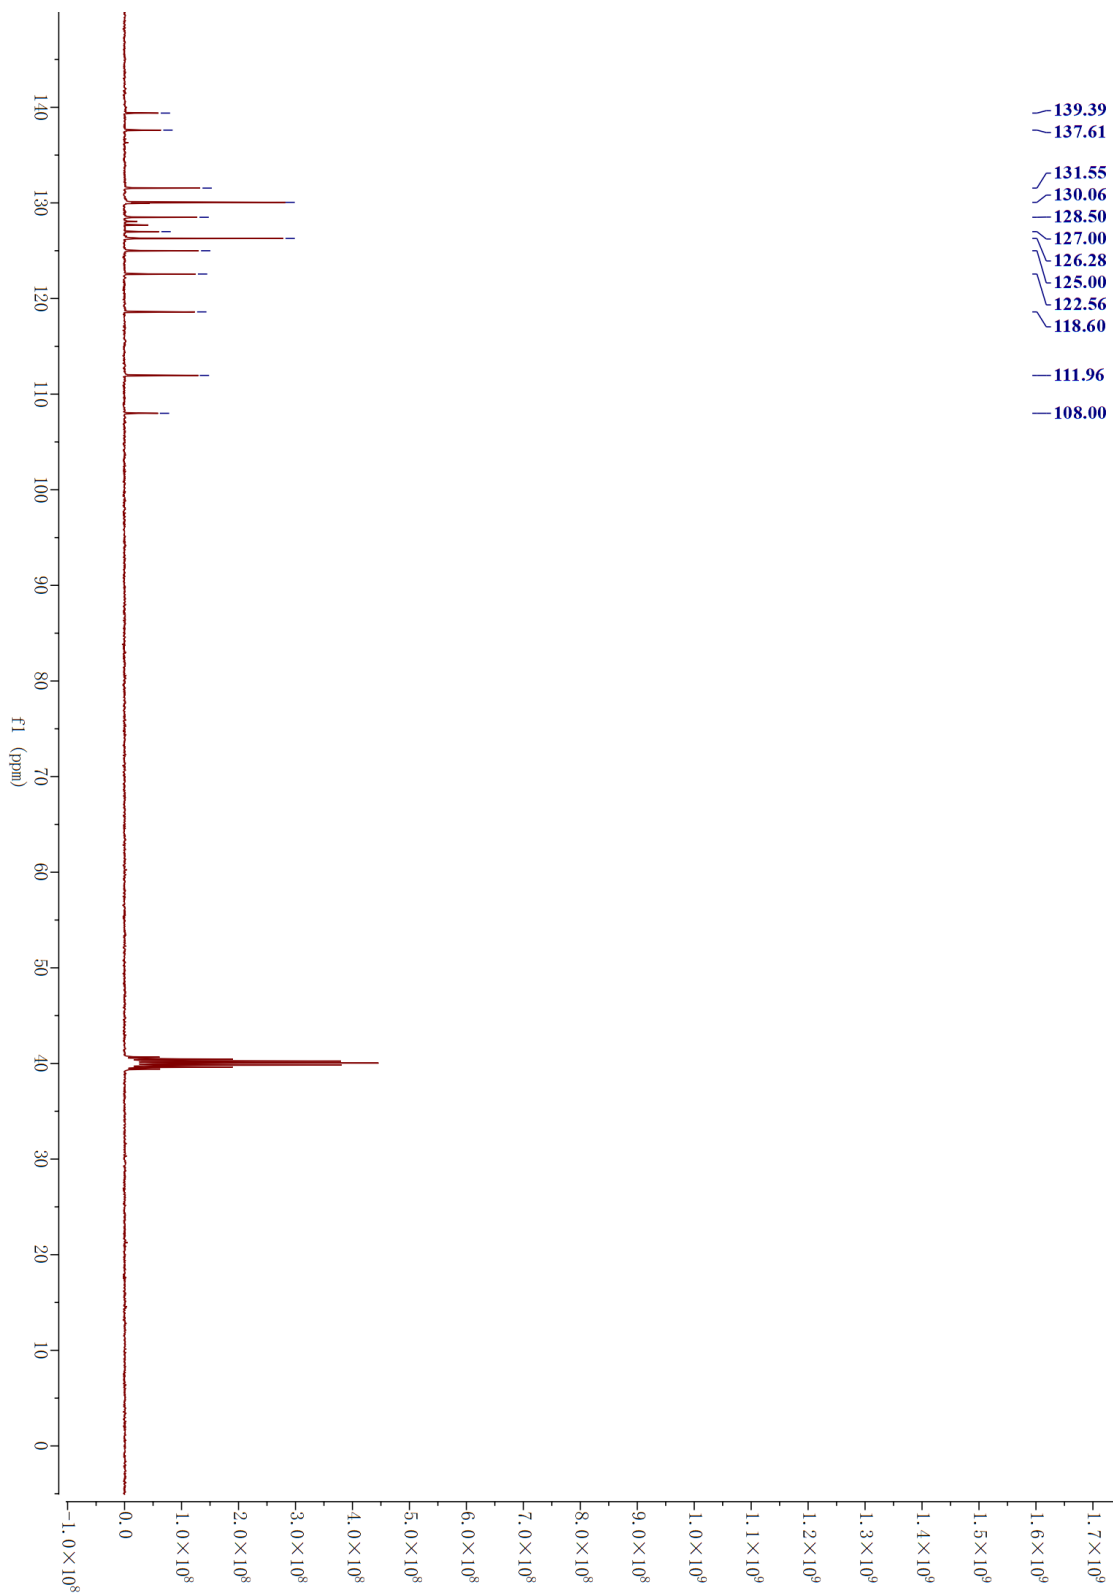



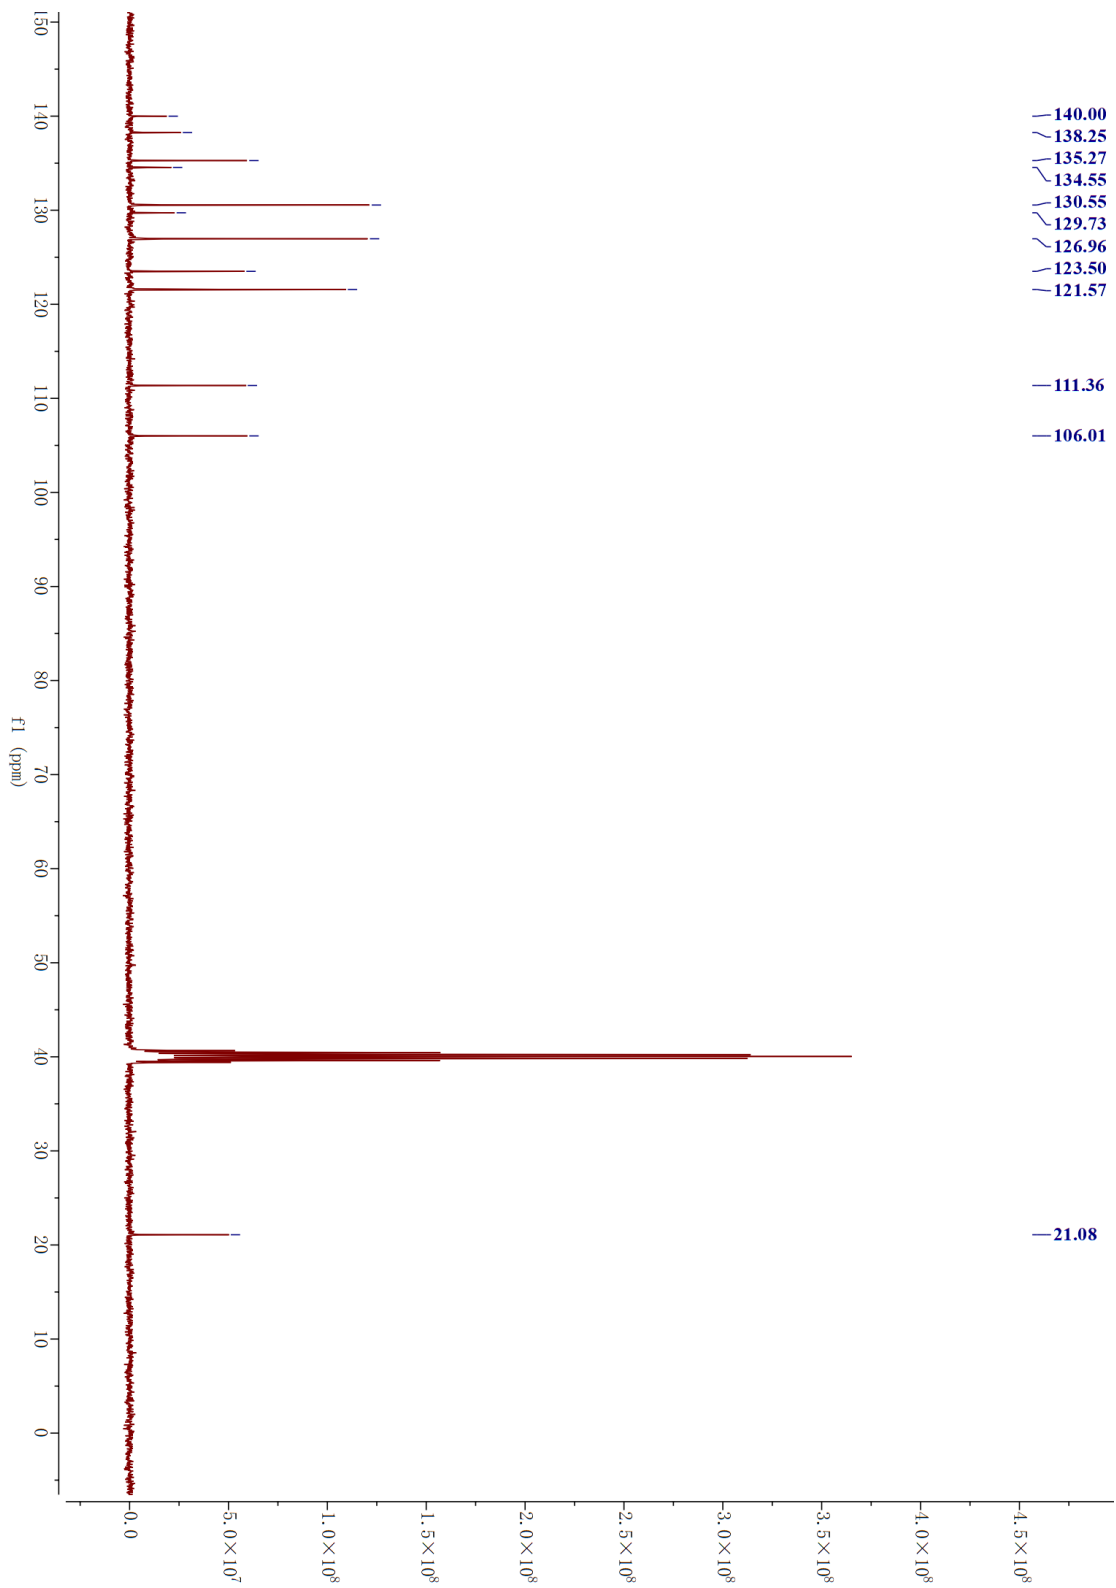



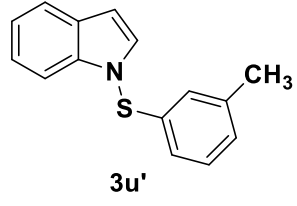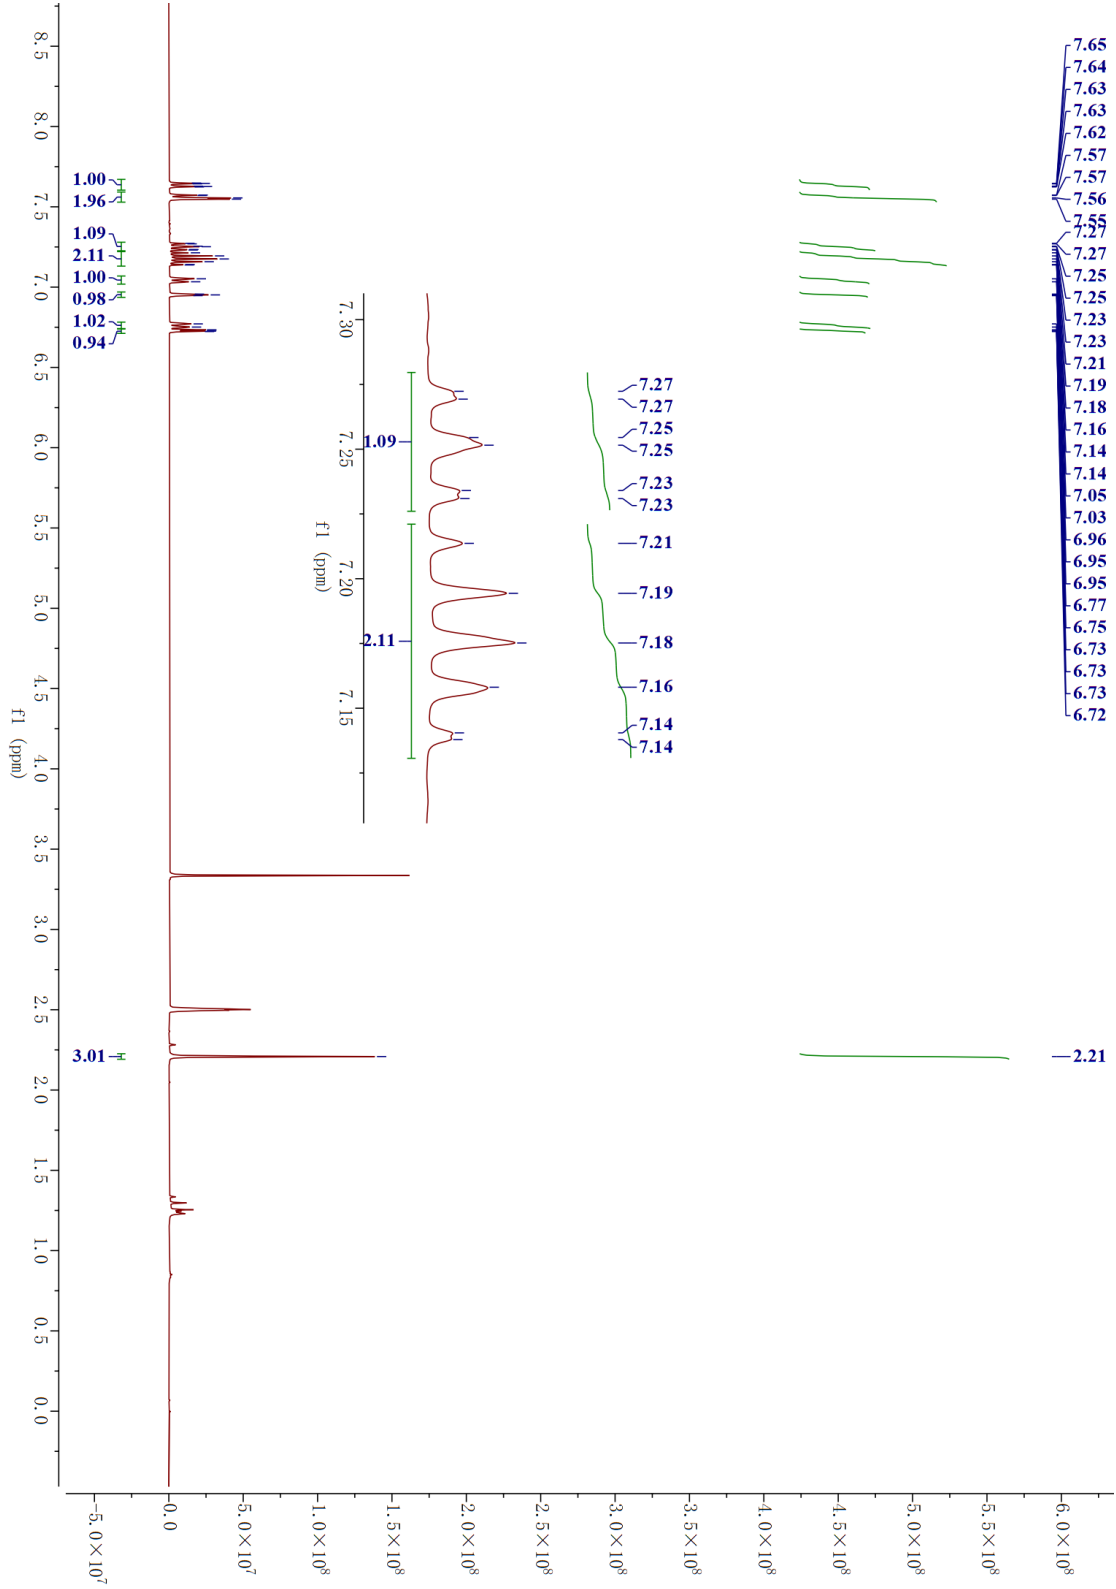

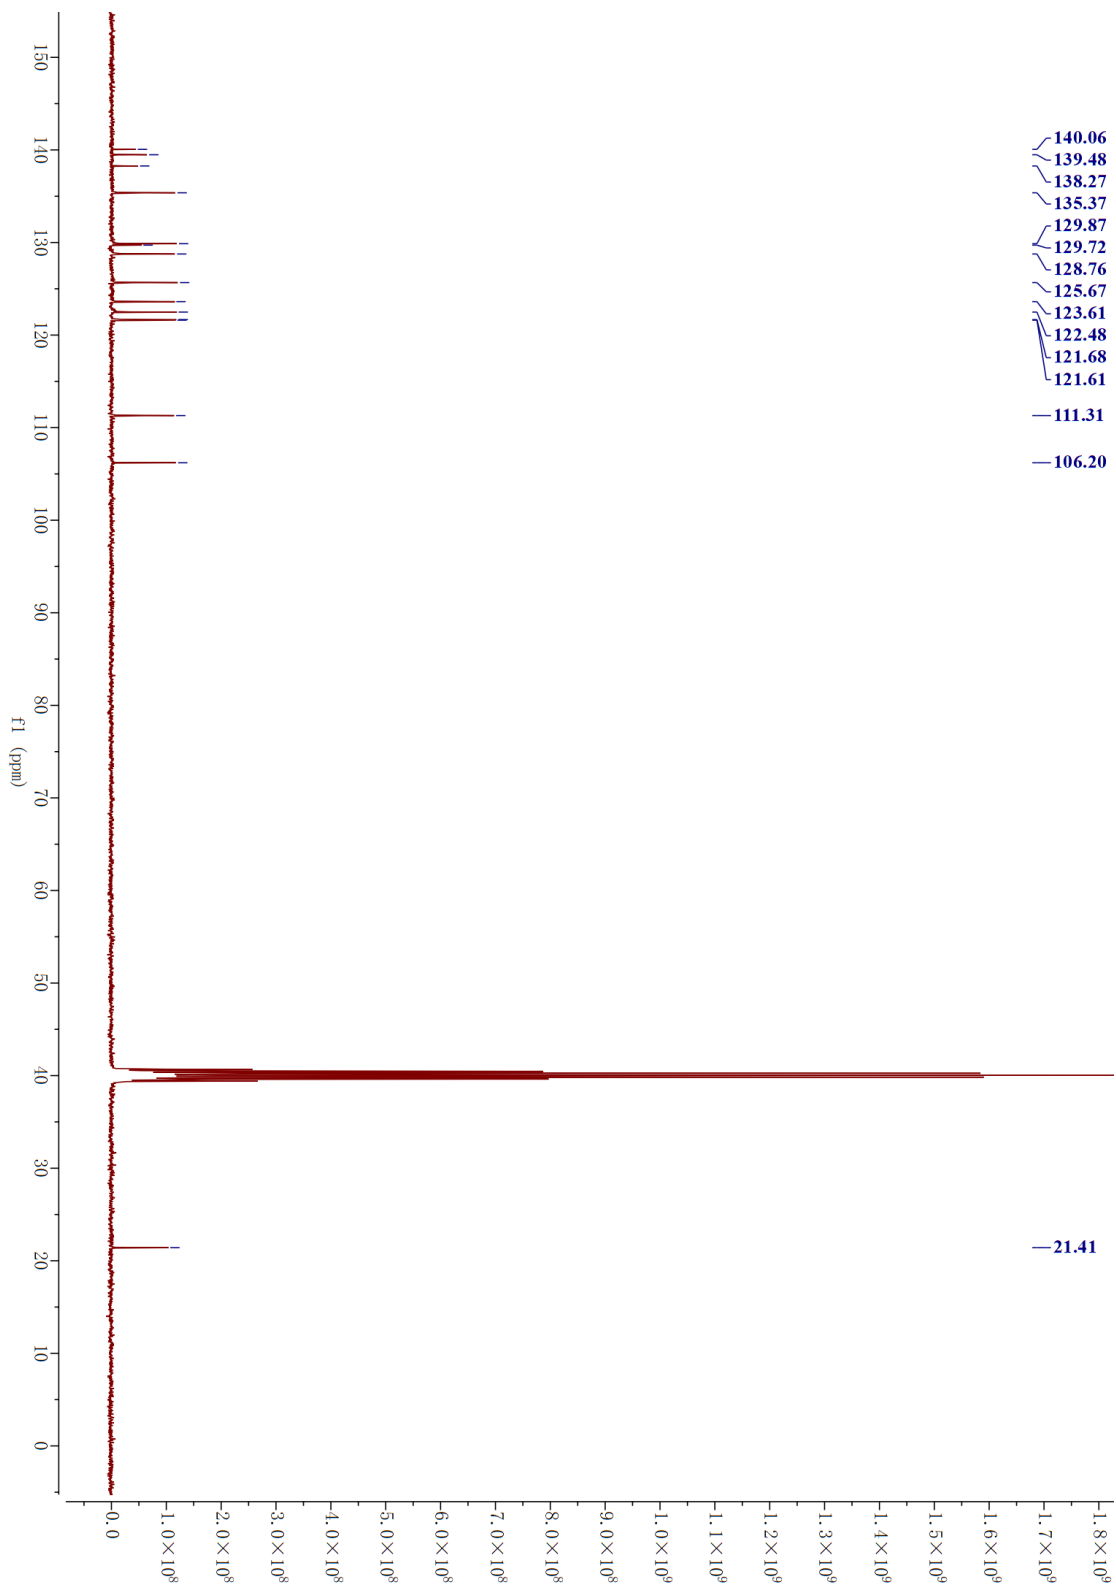

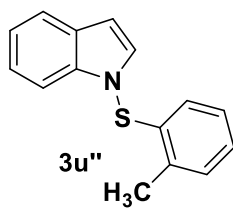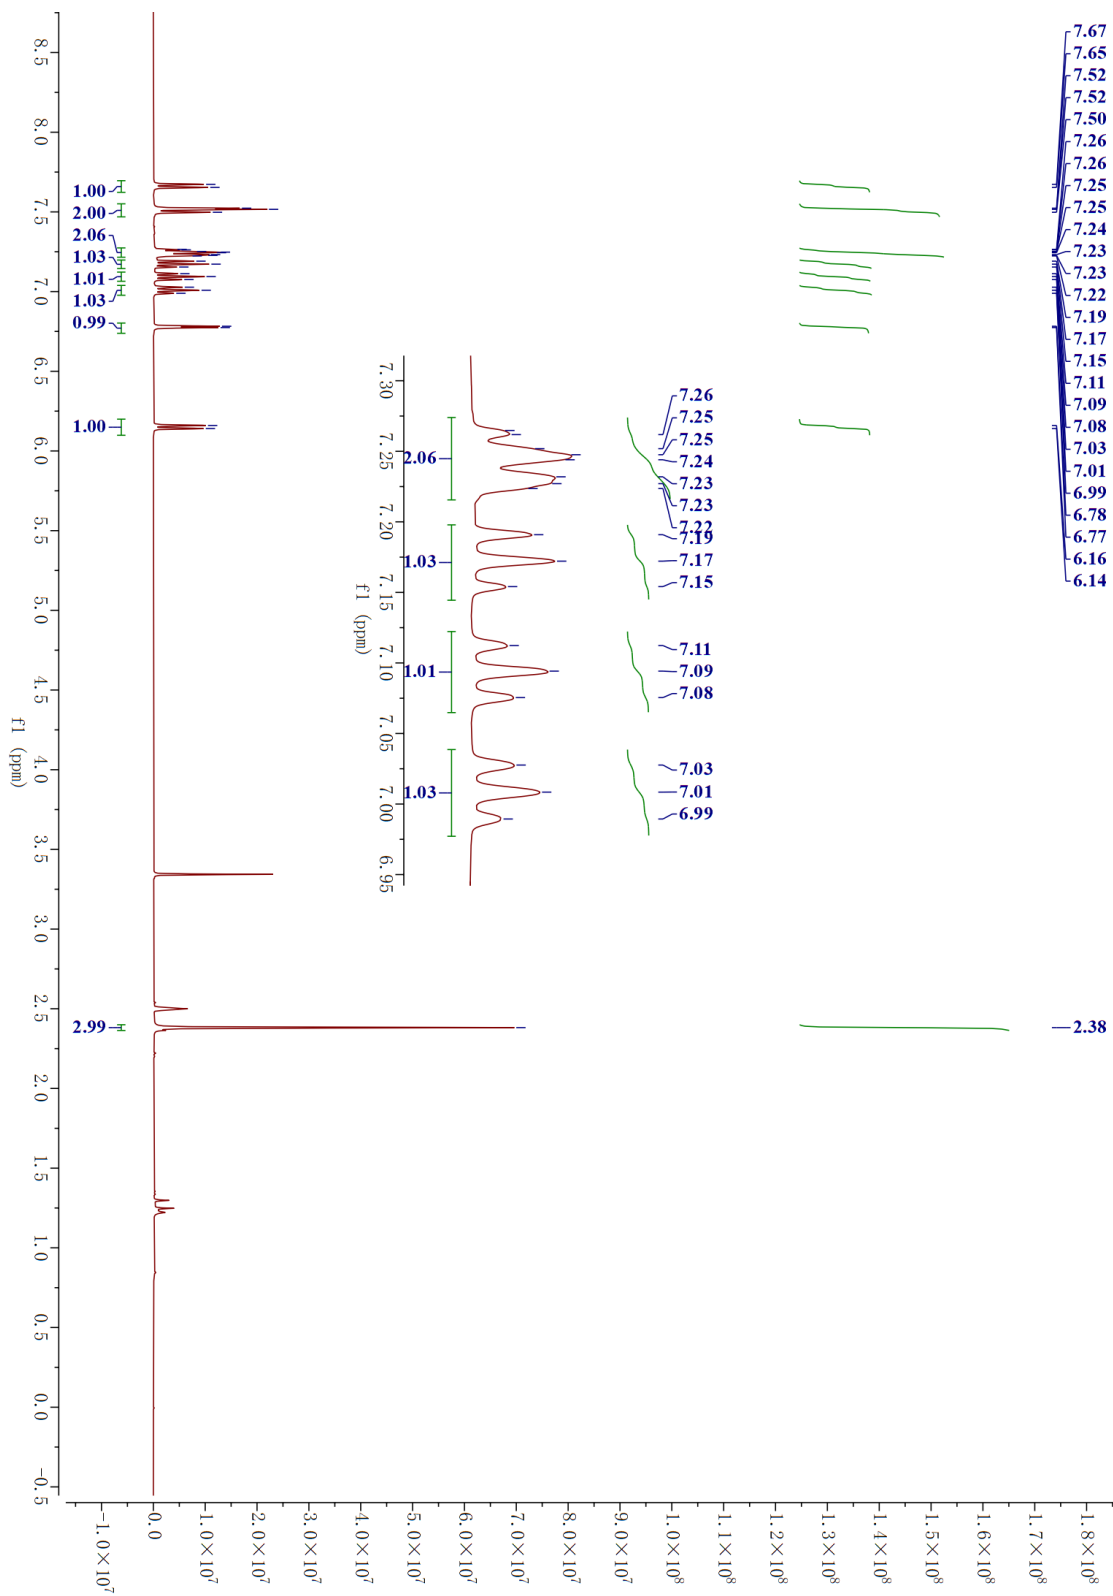

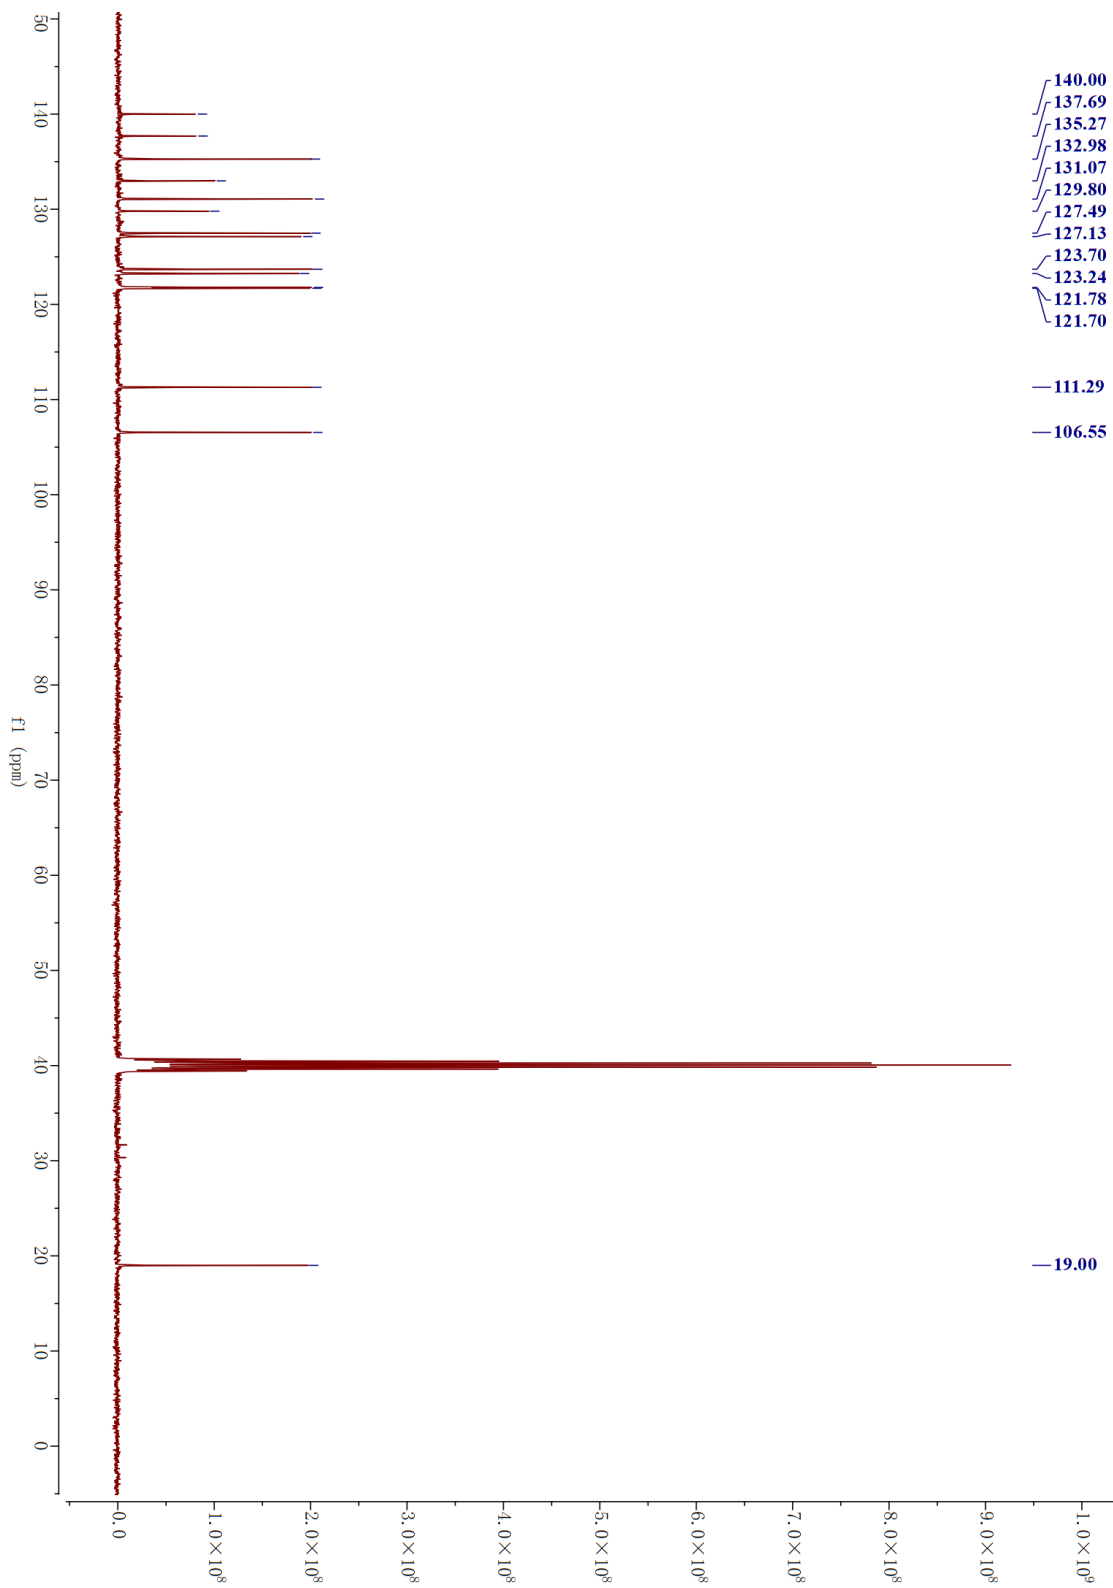

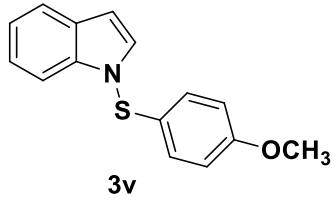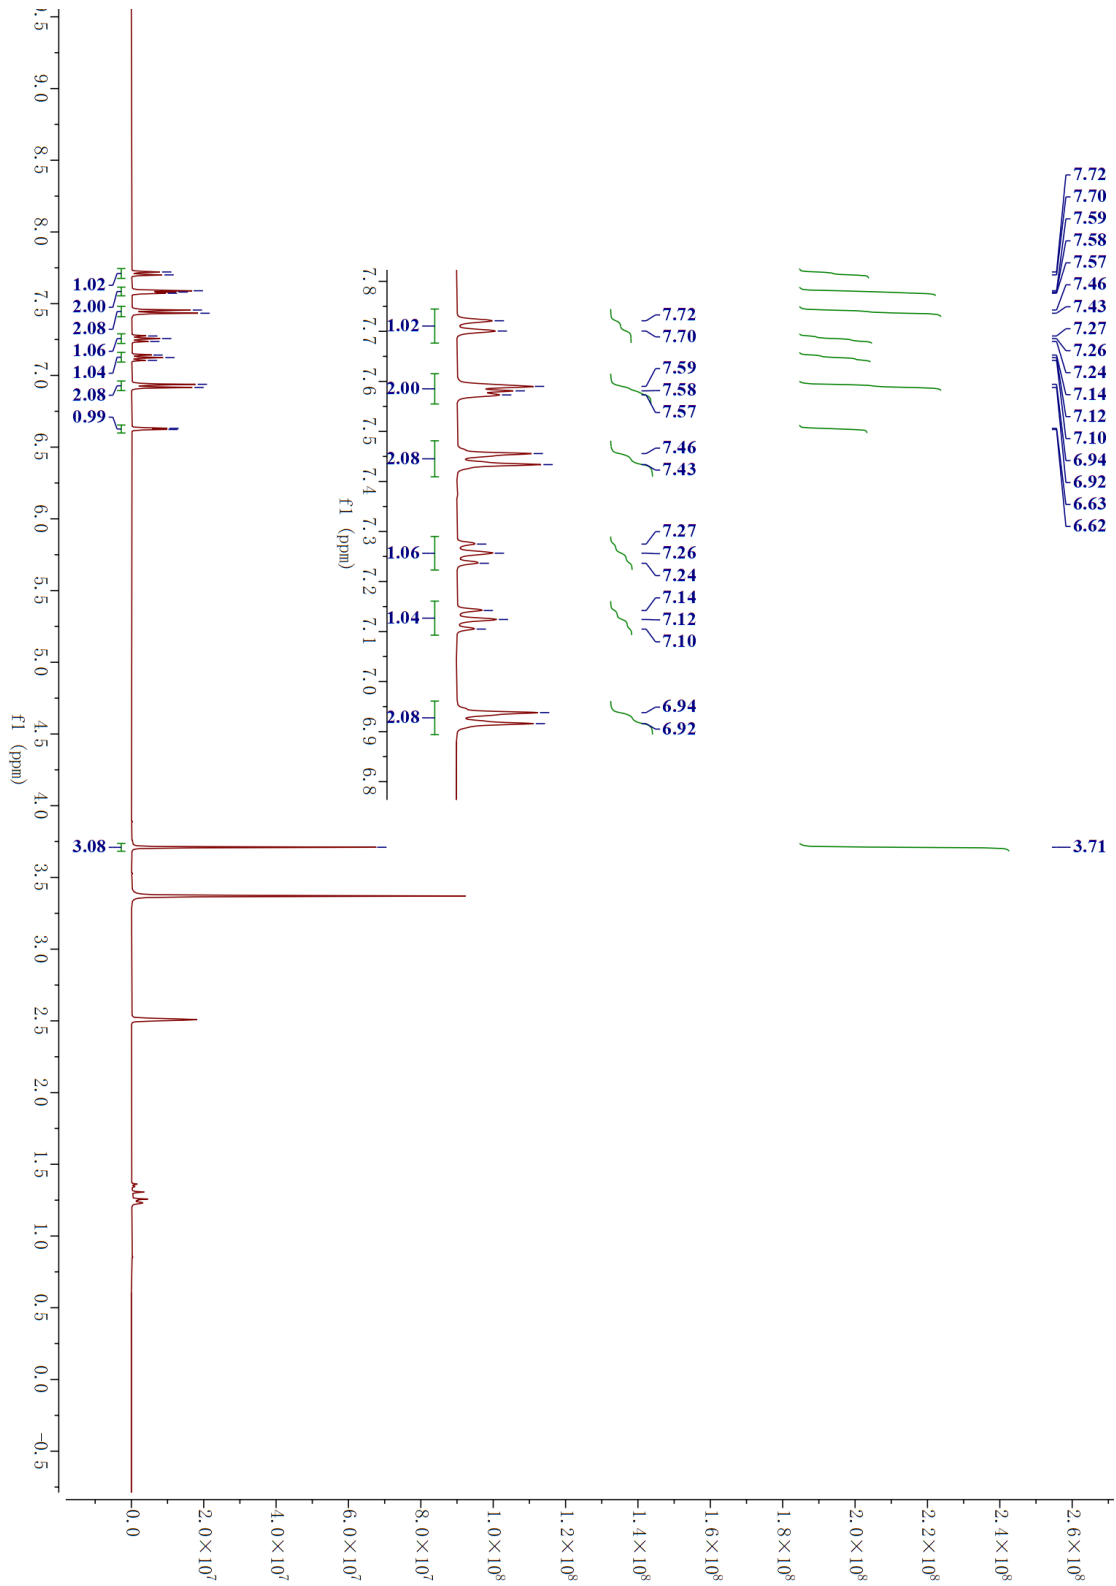

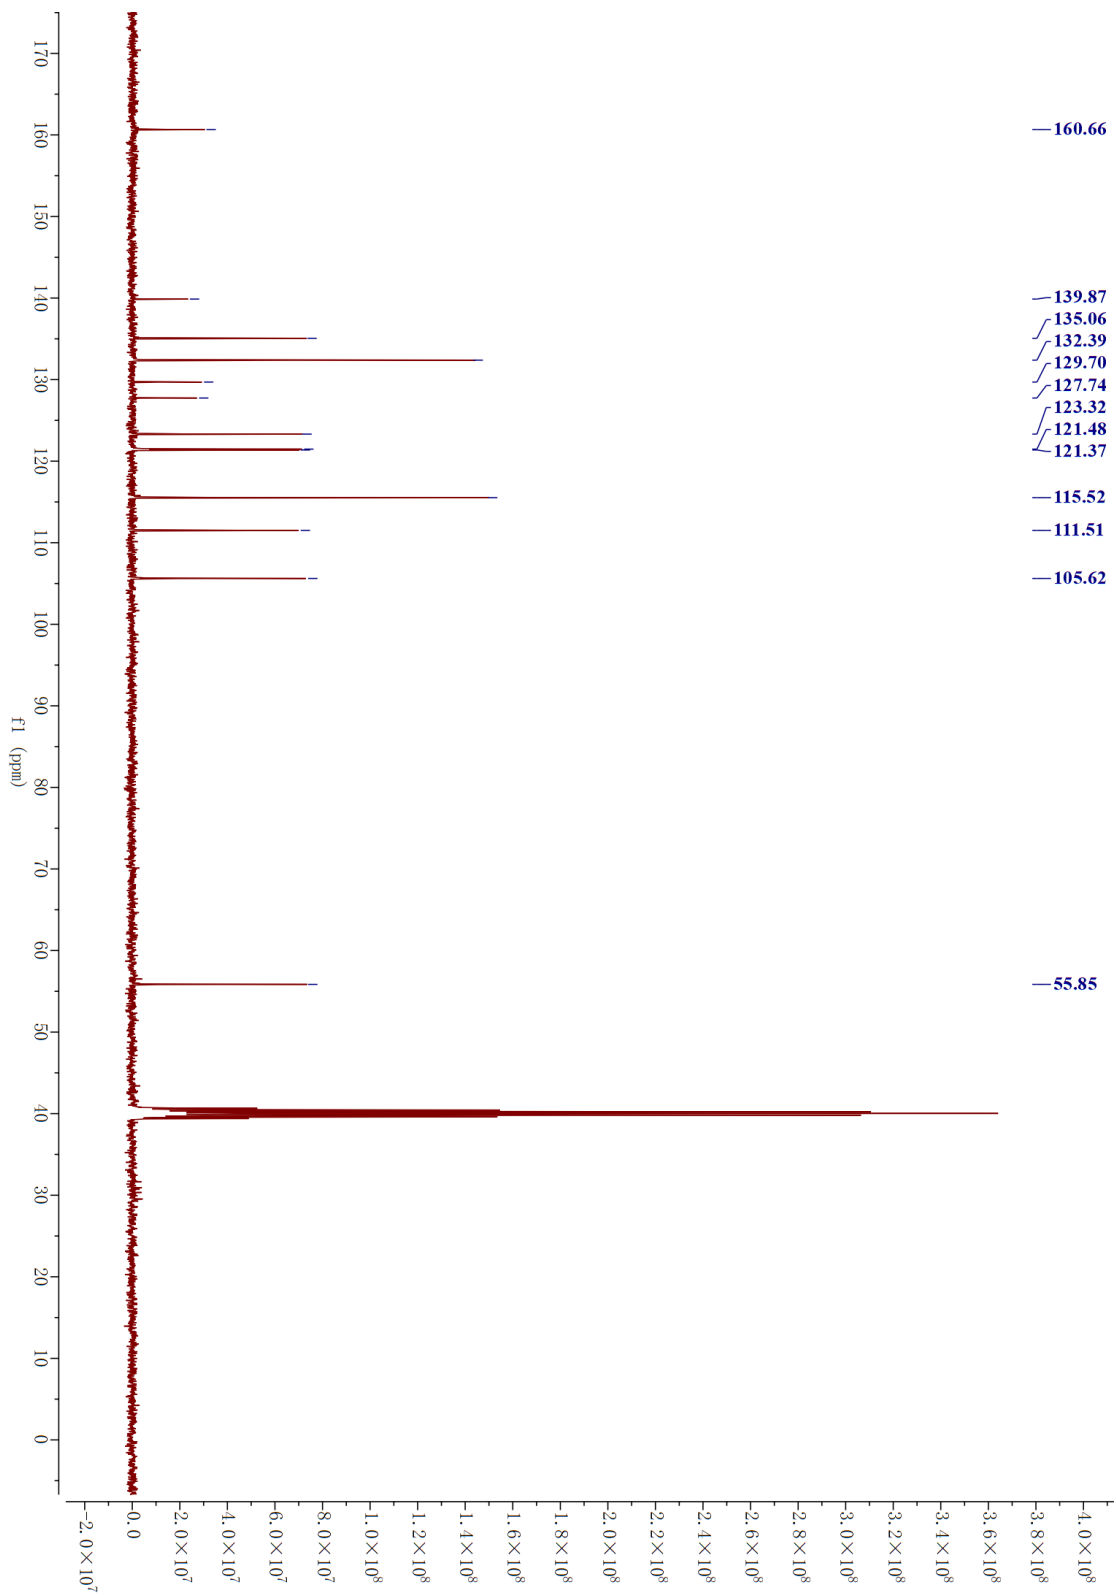

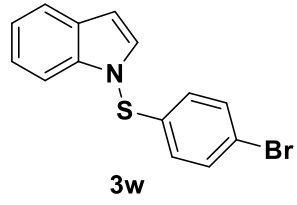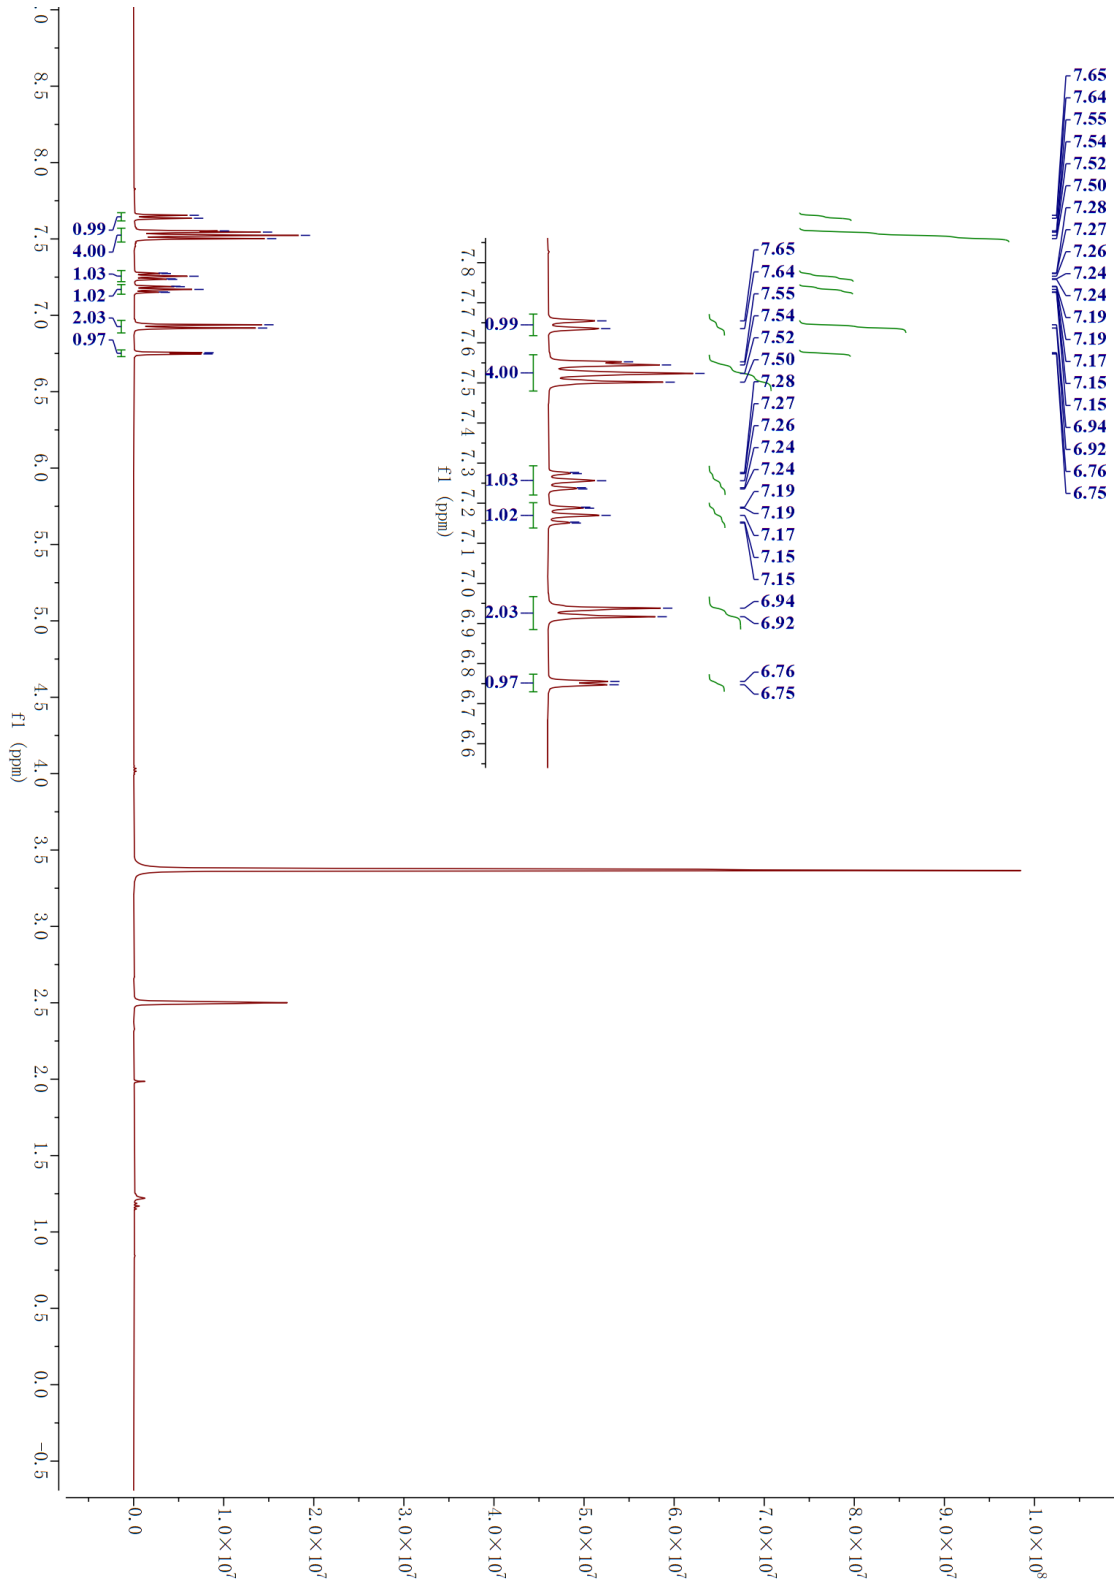

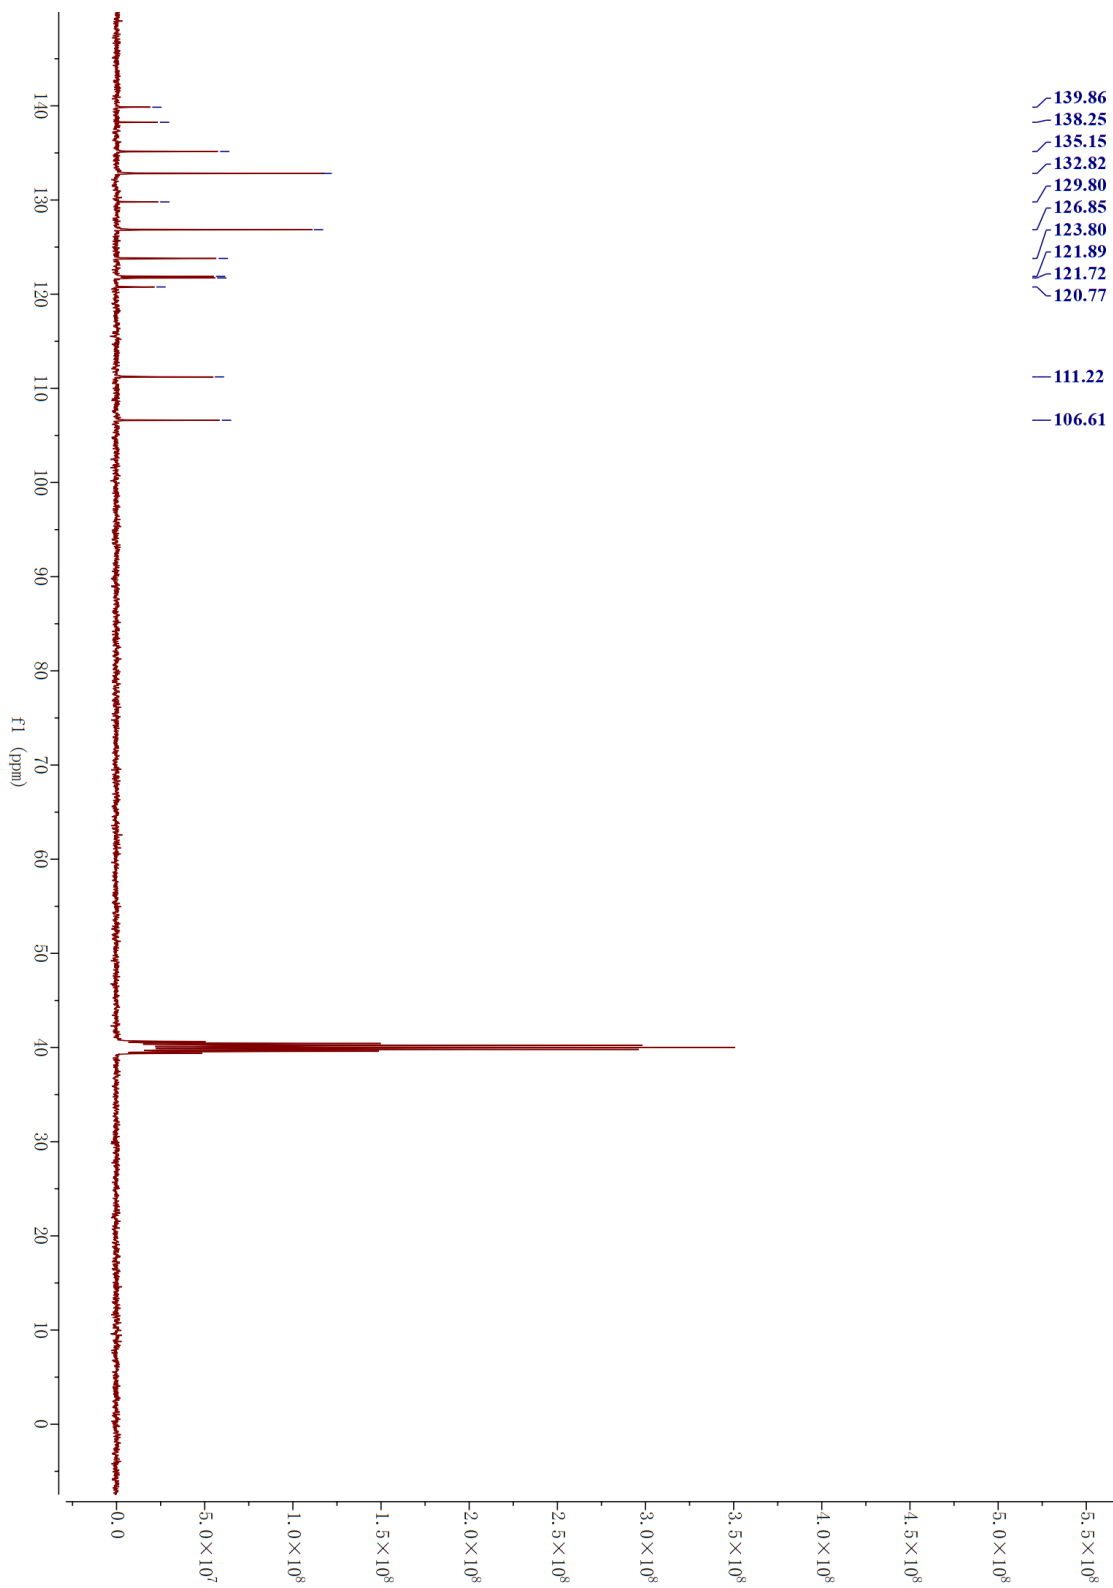



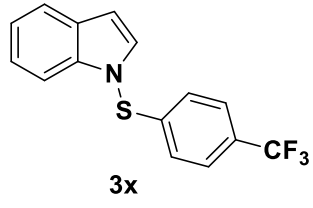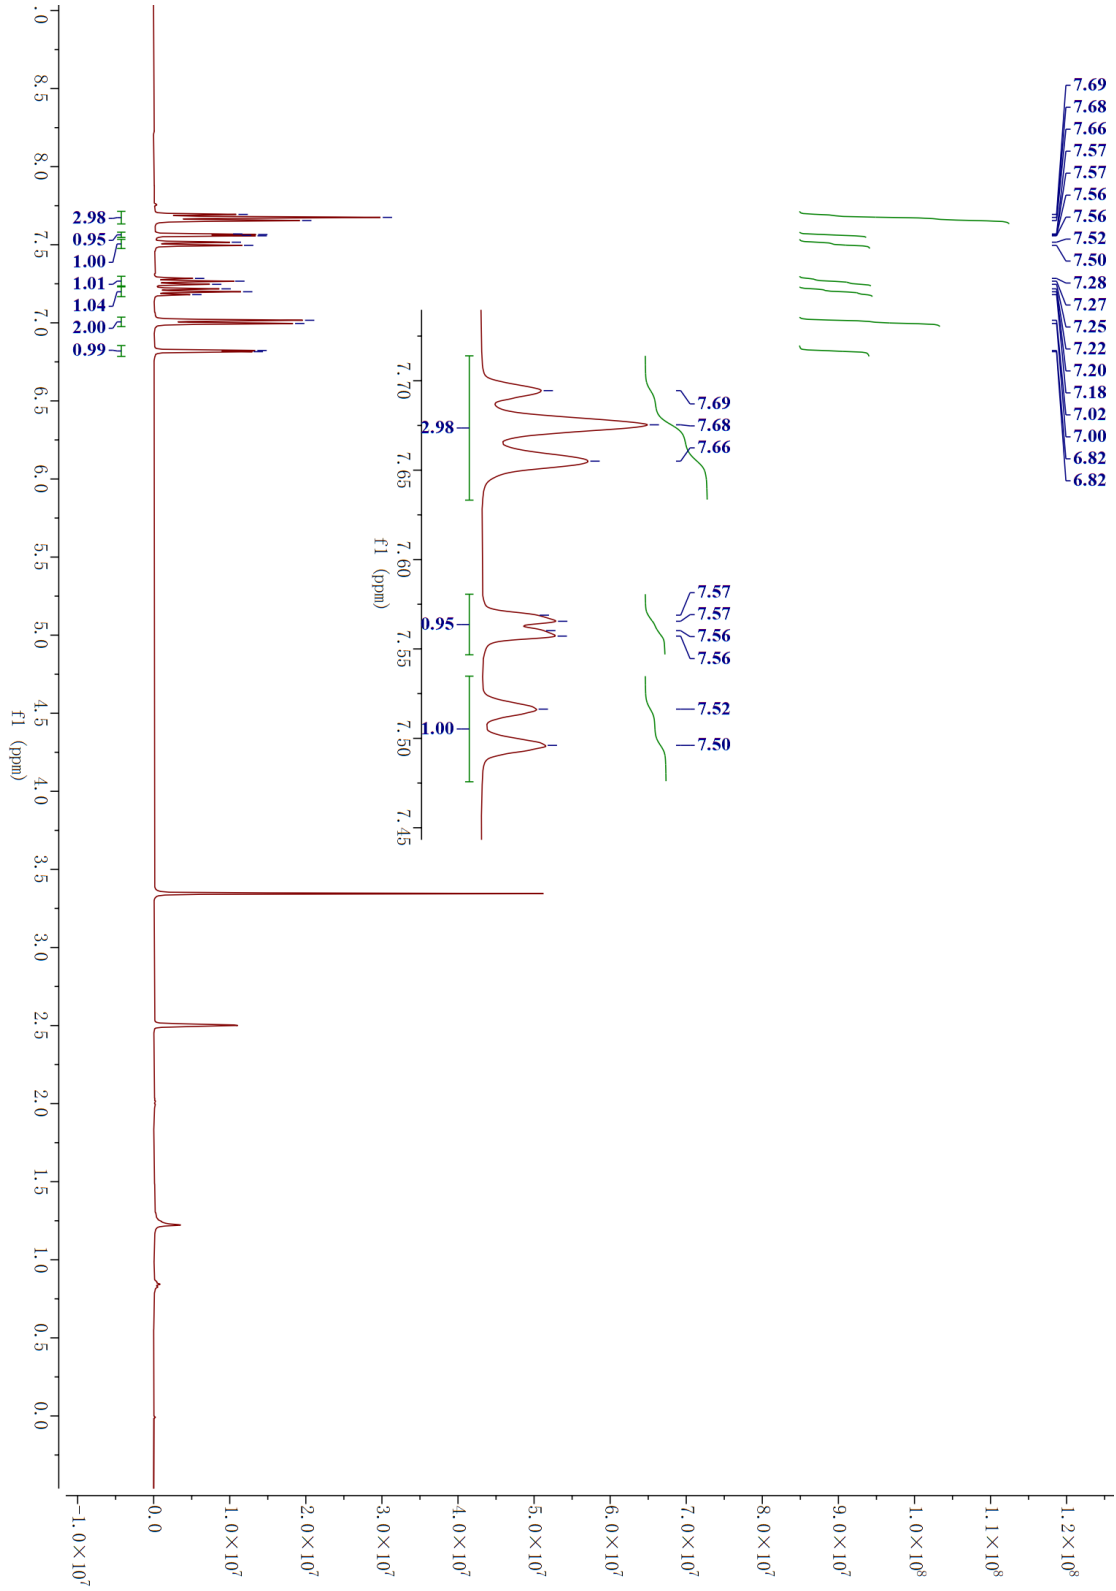

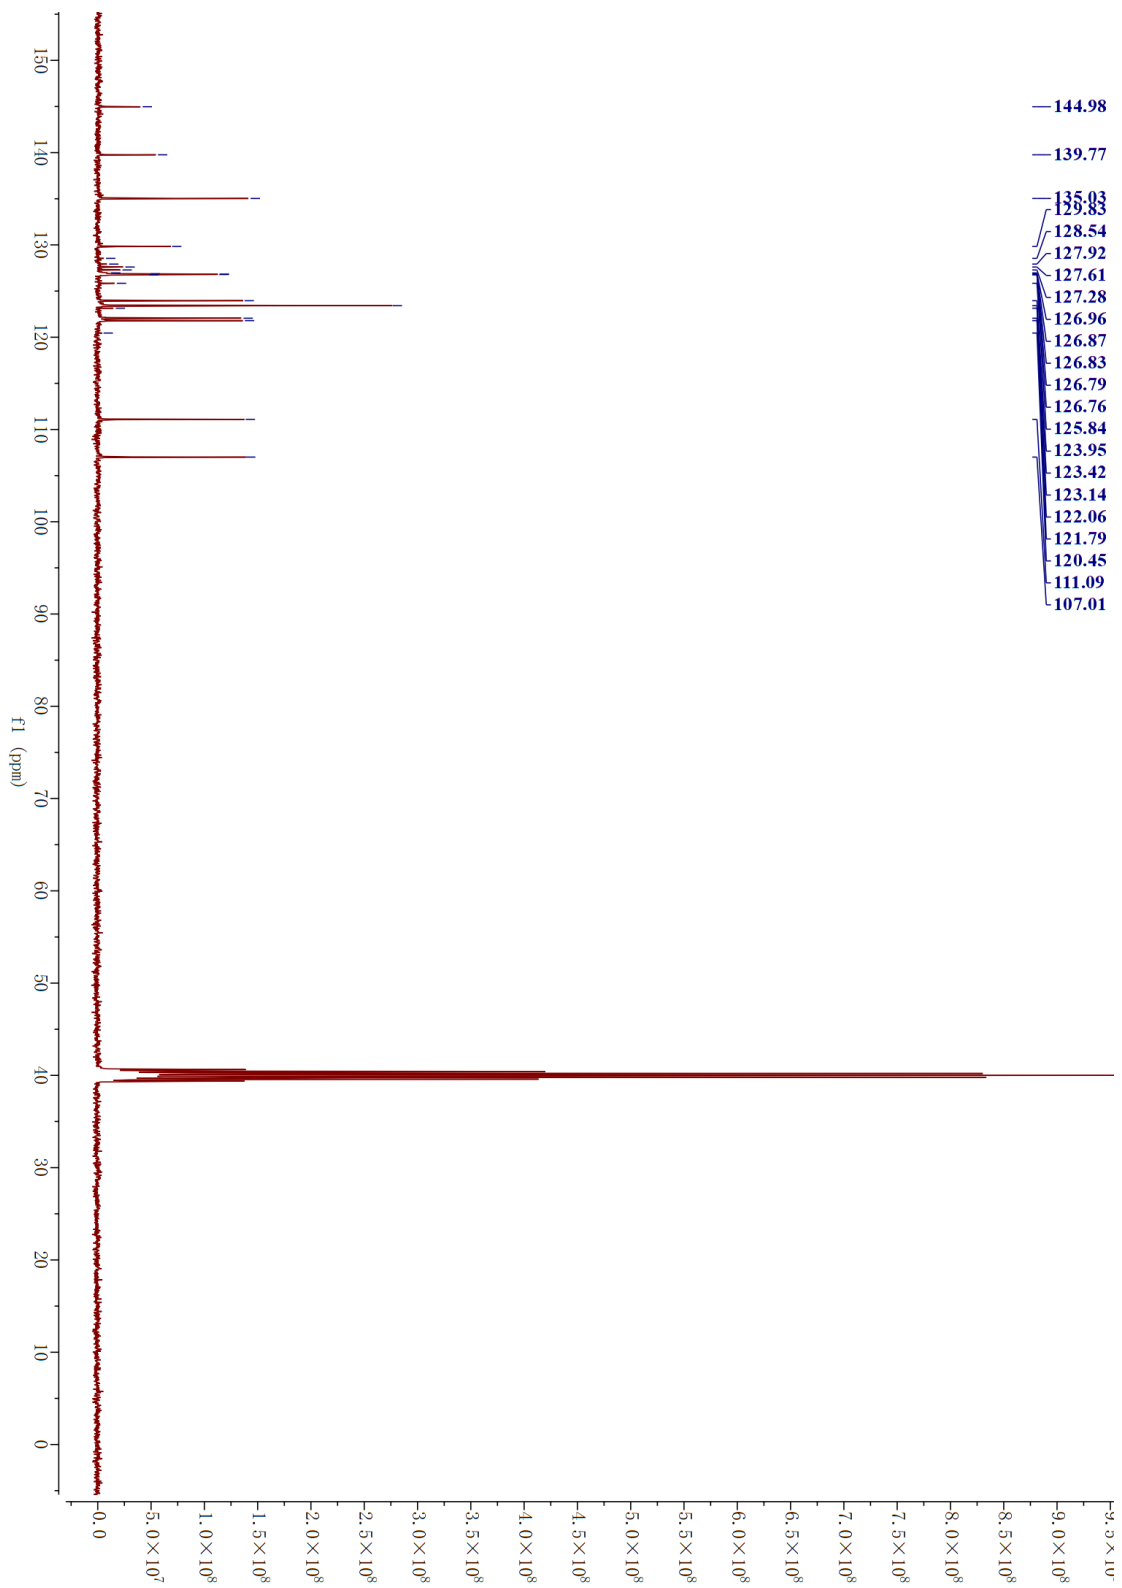

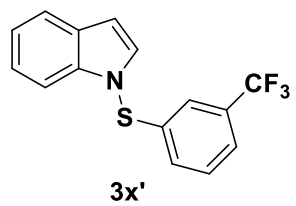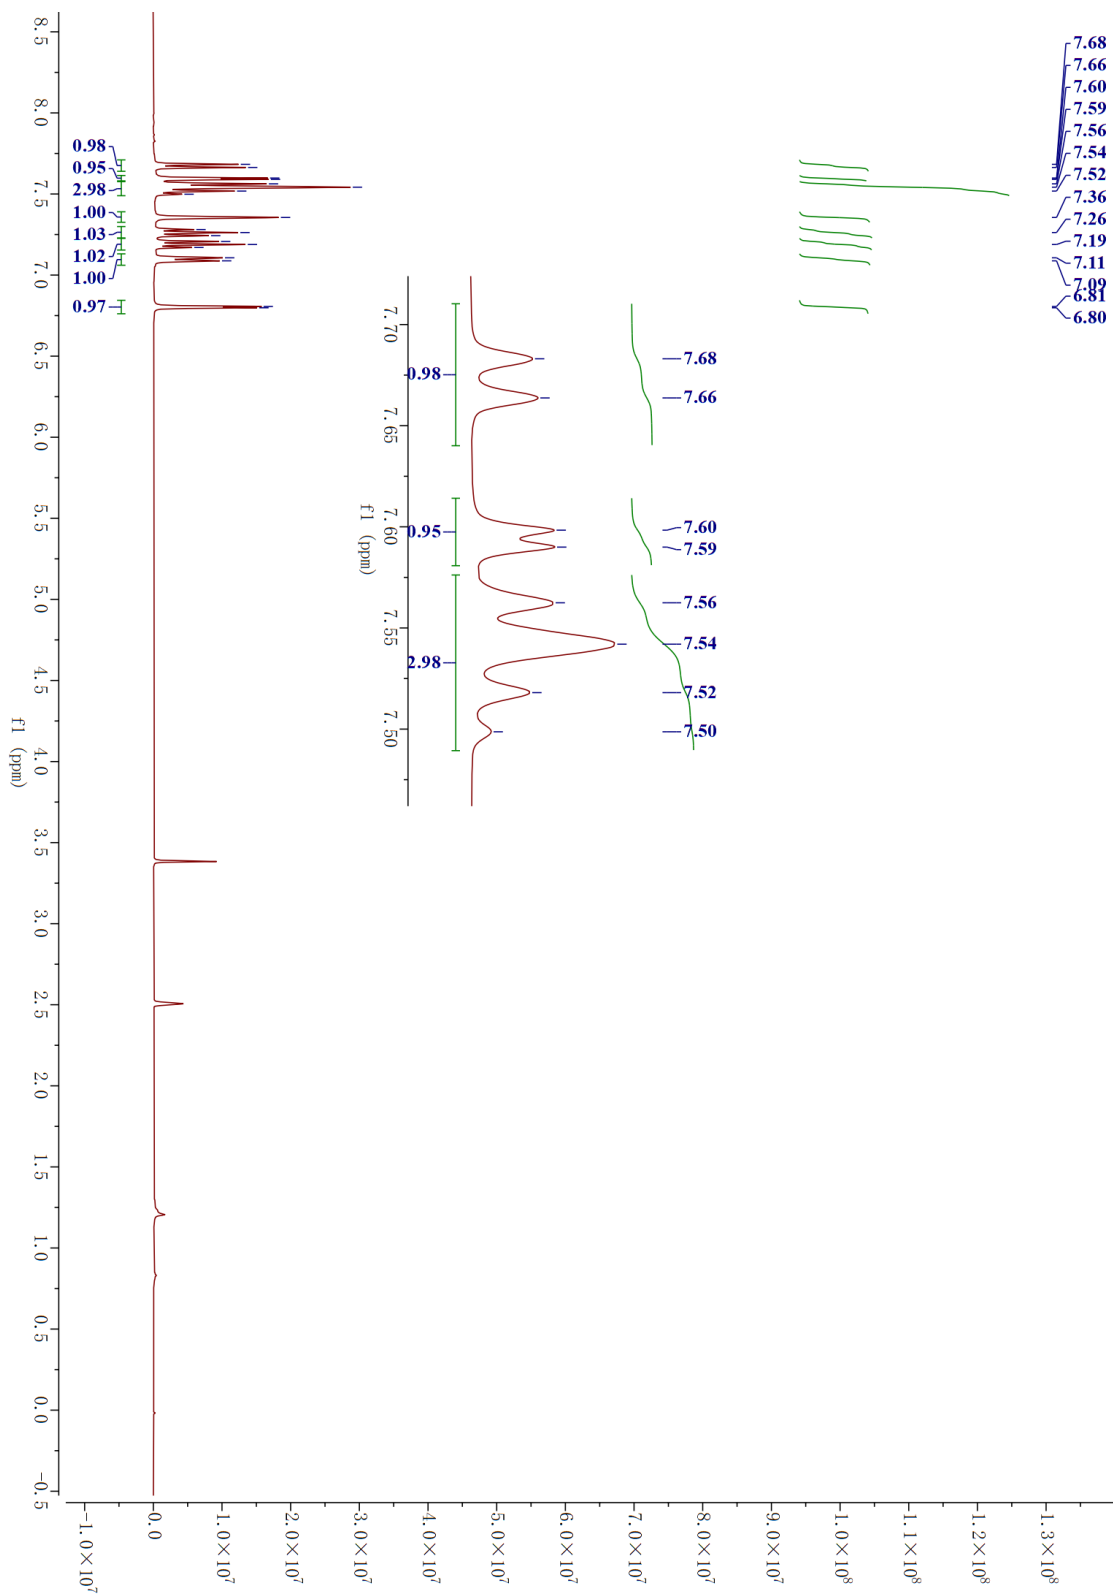

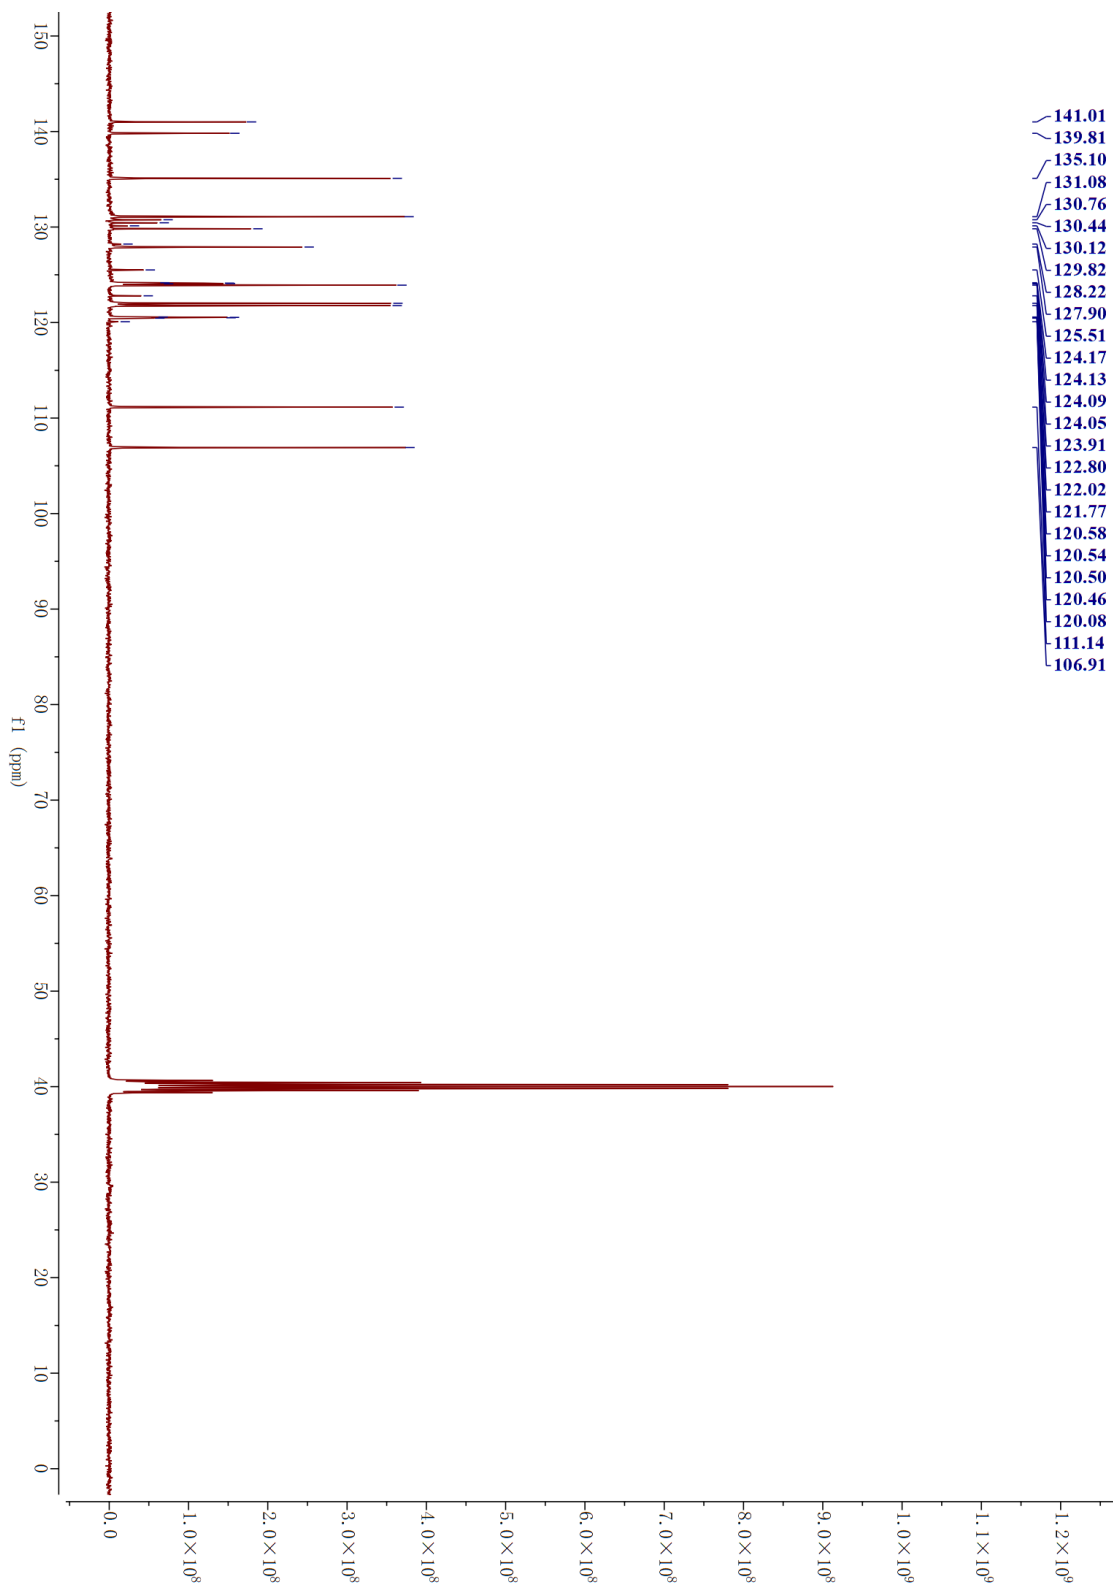

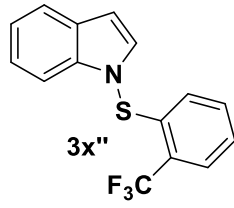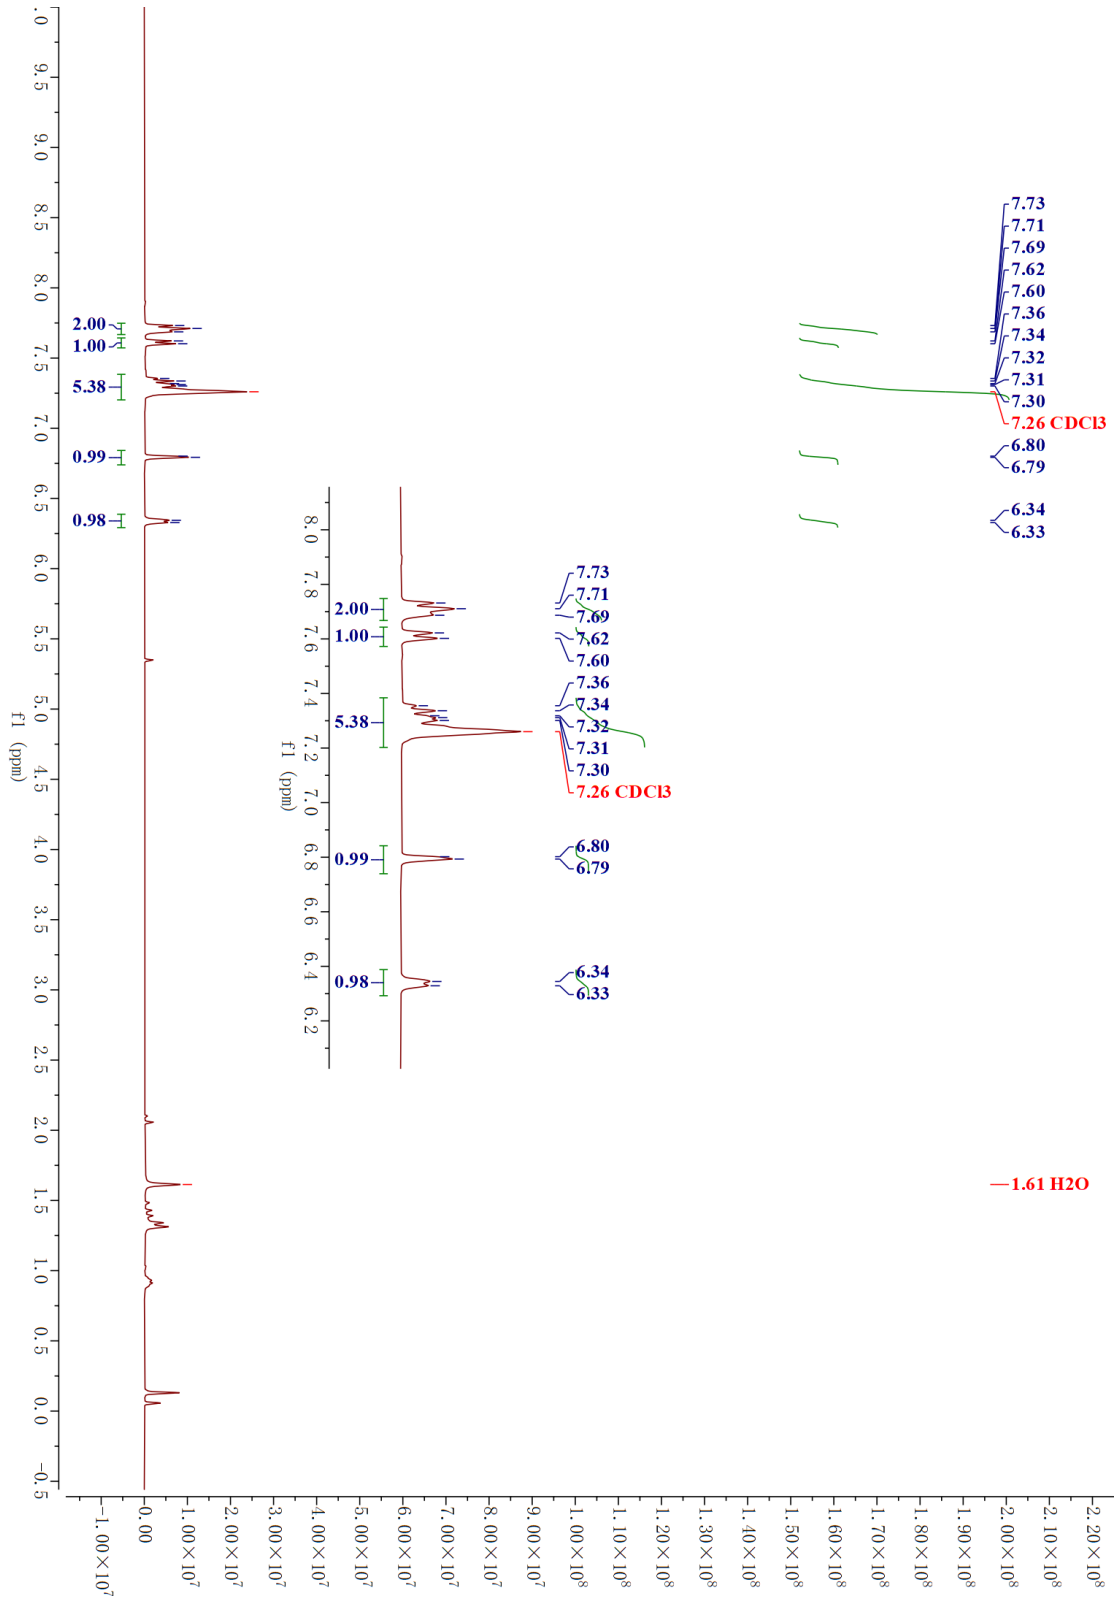

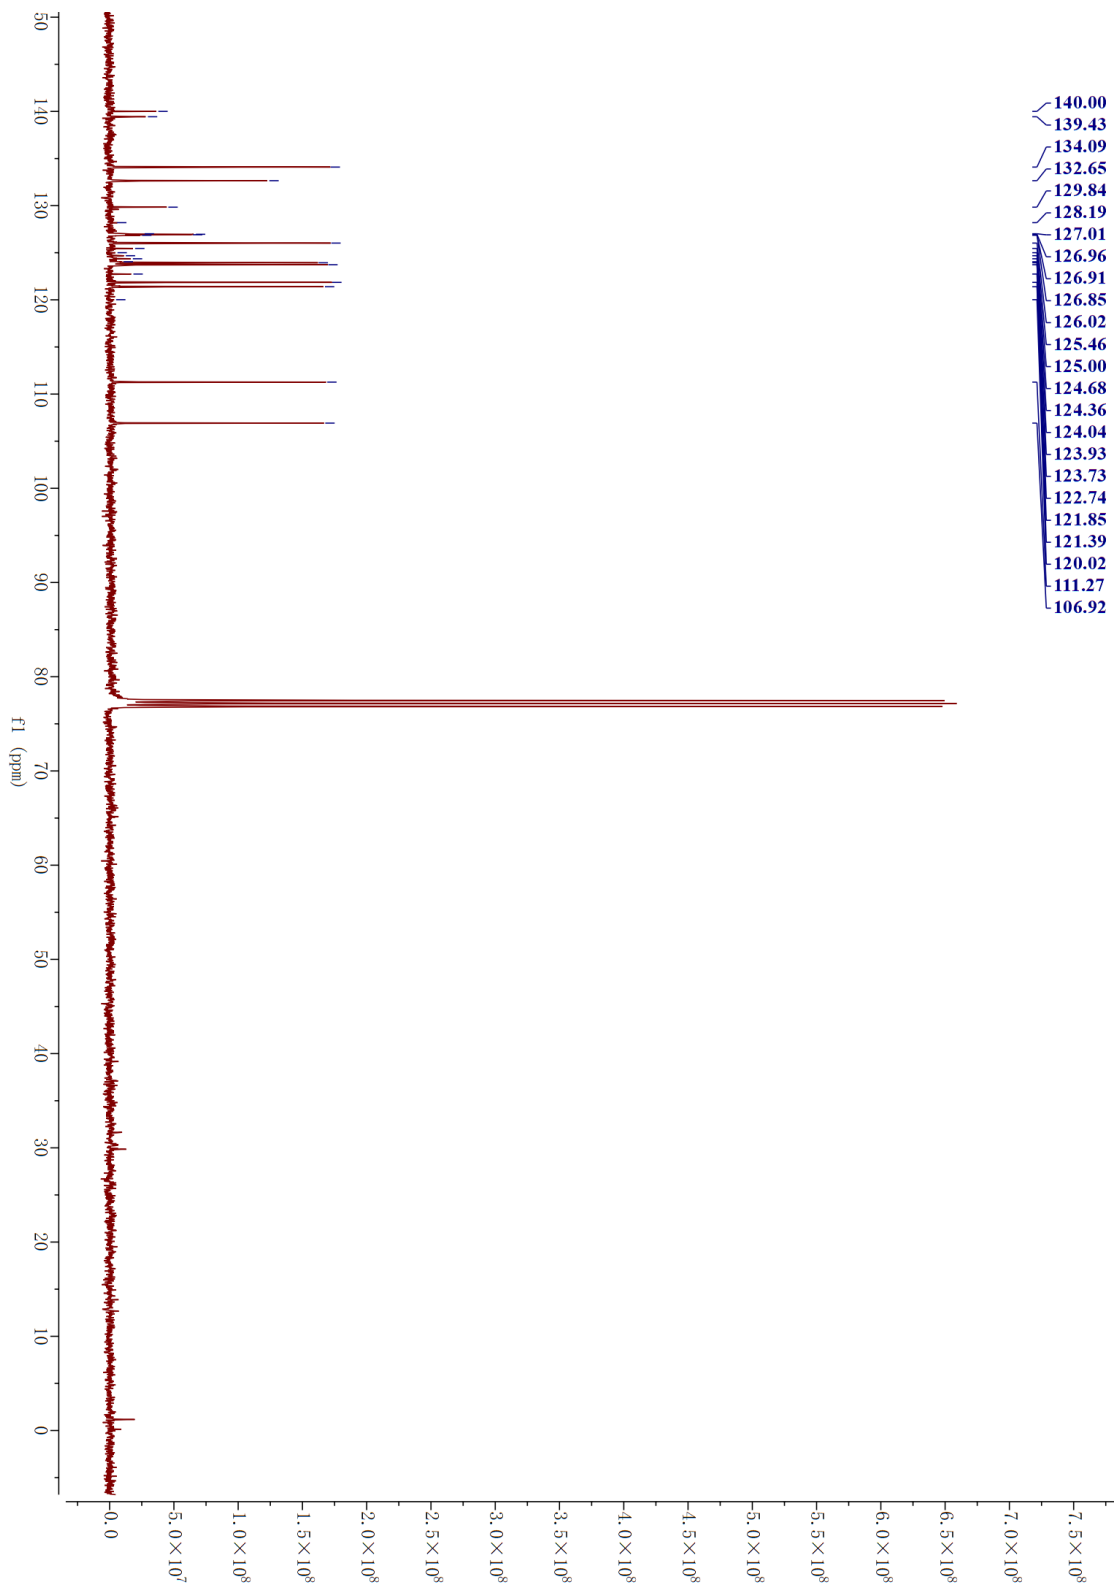

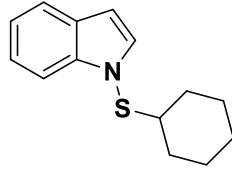

**3z**

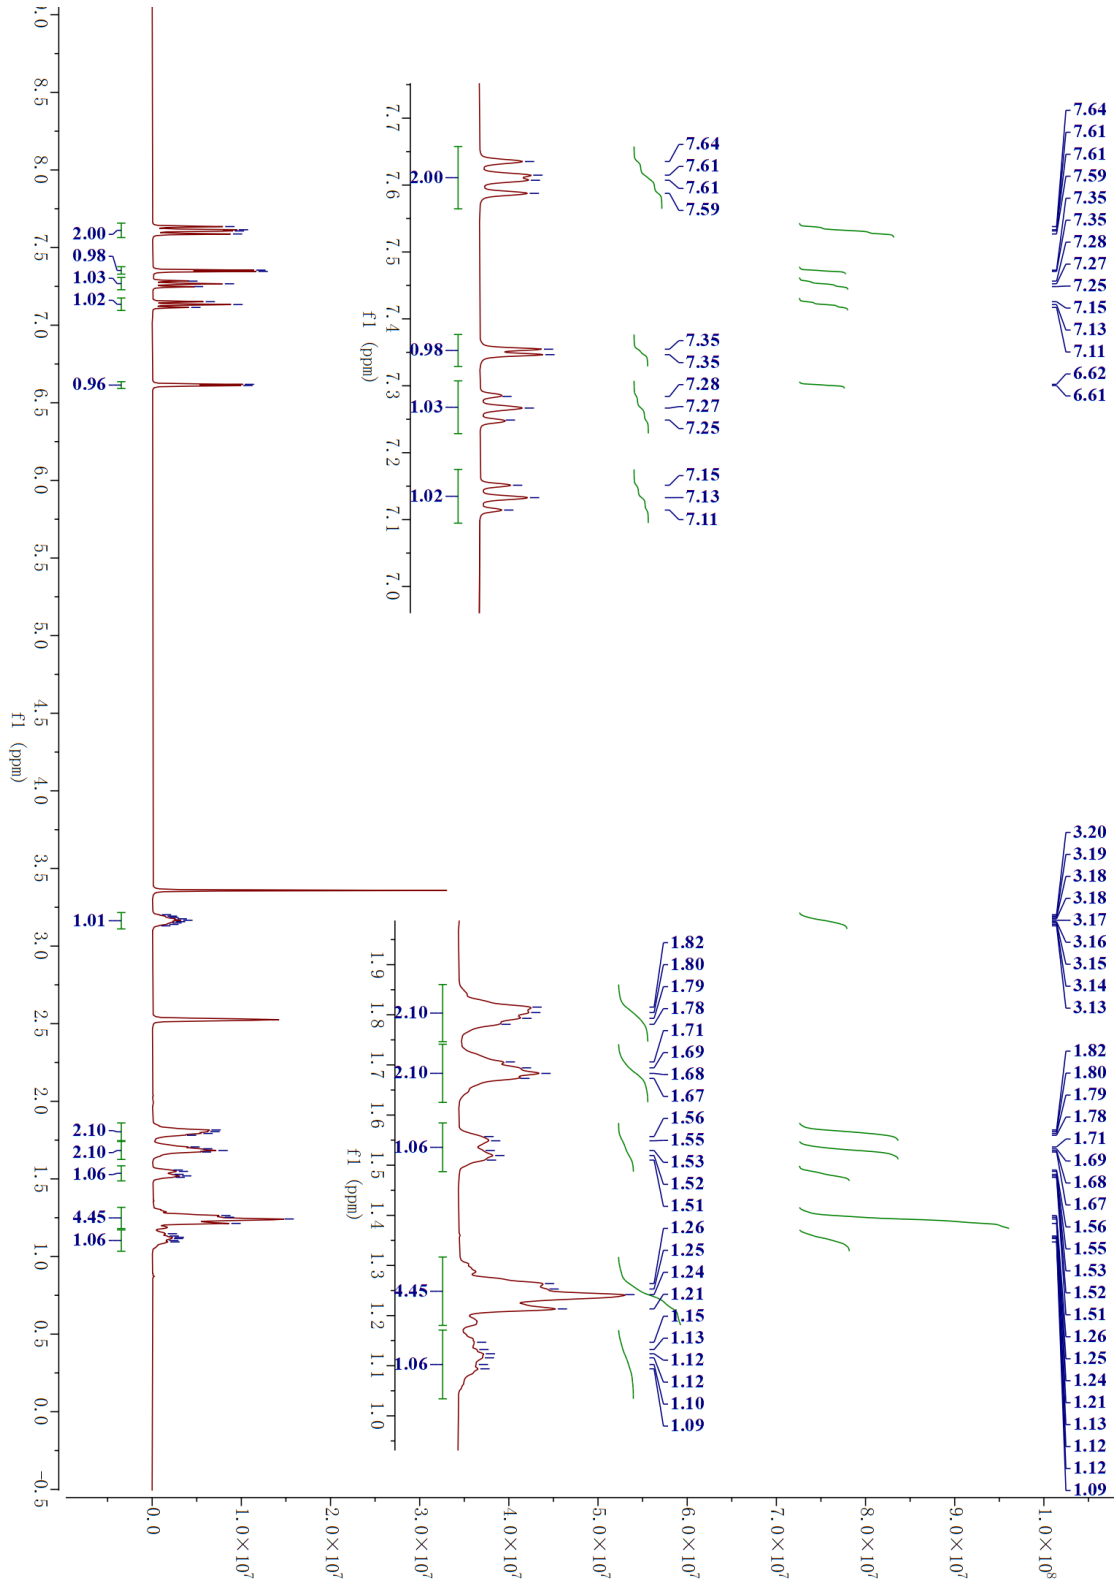

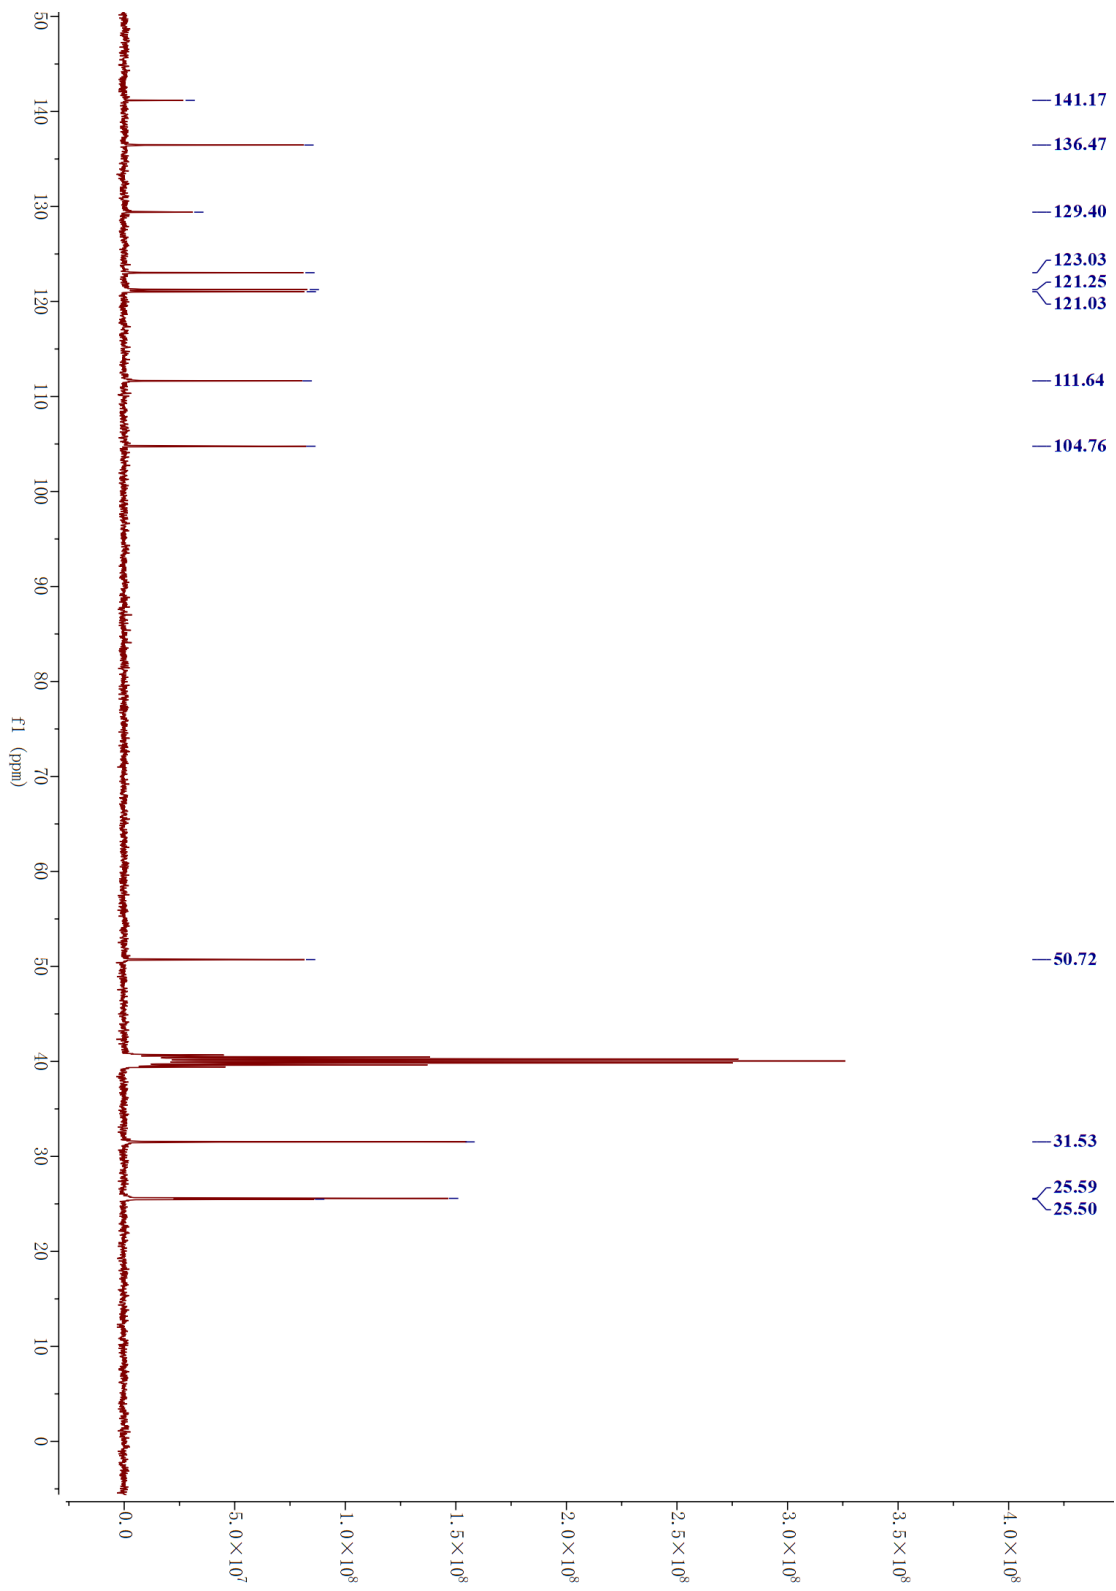



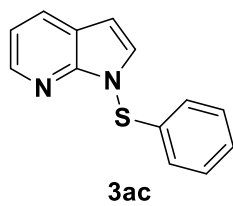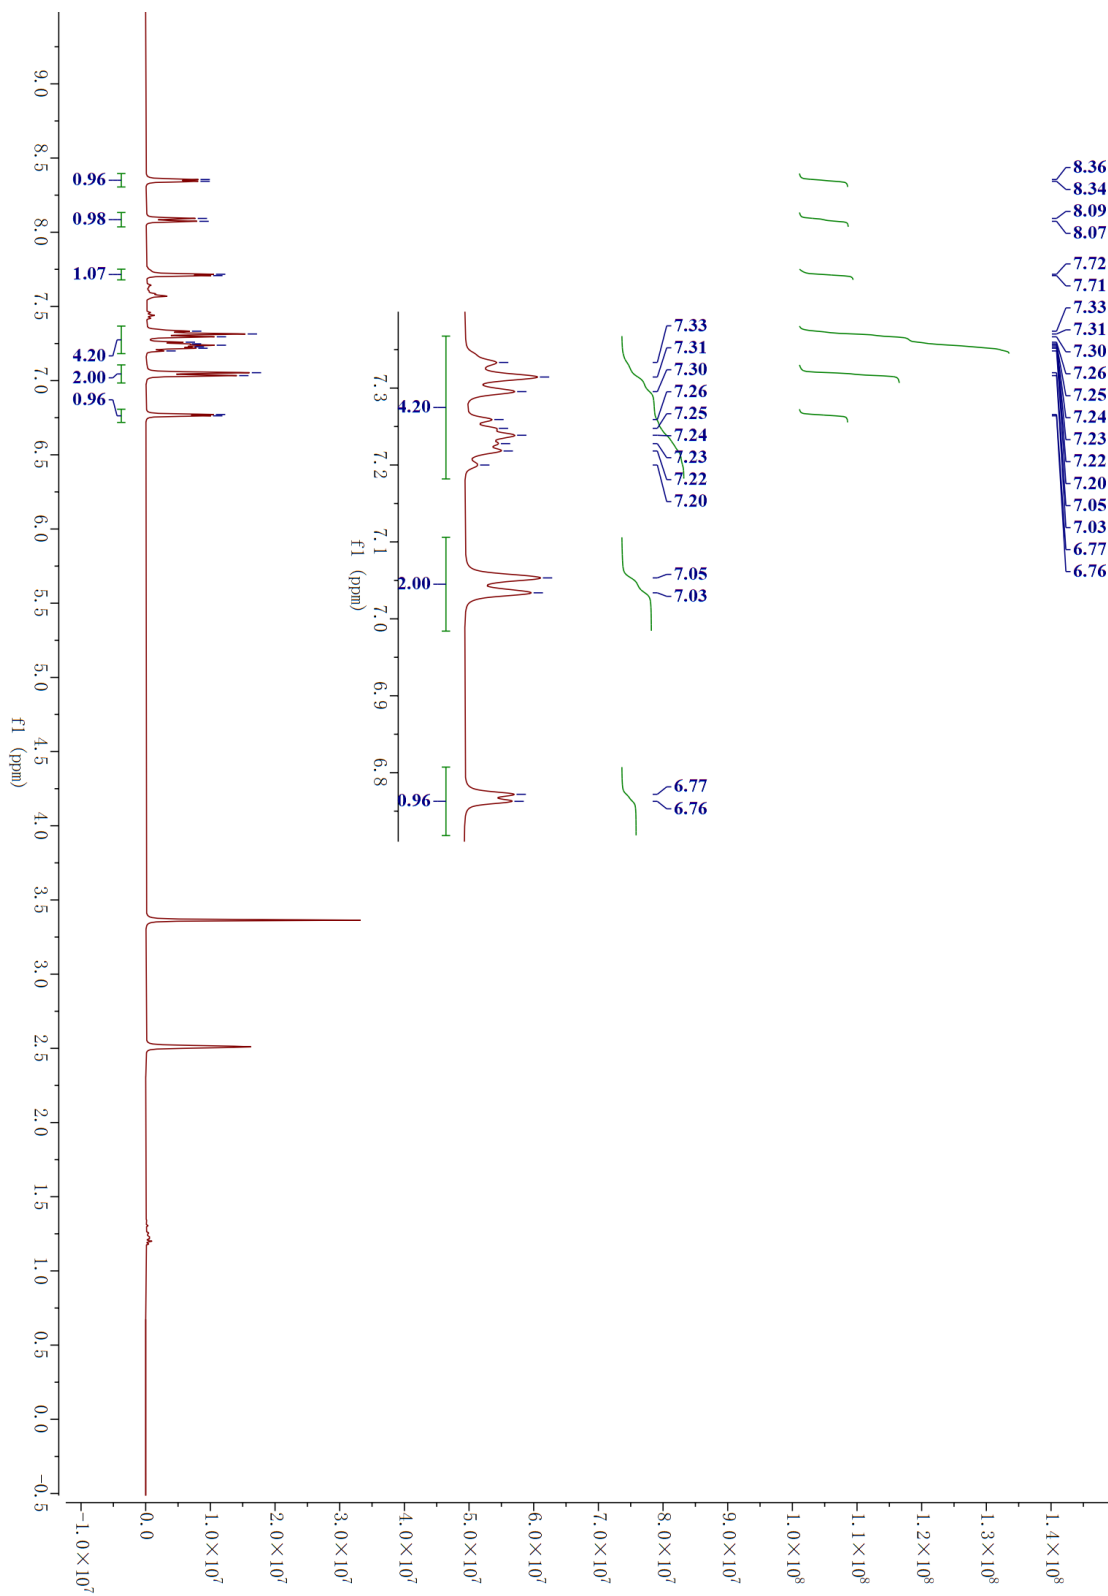

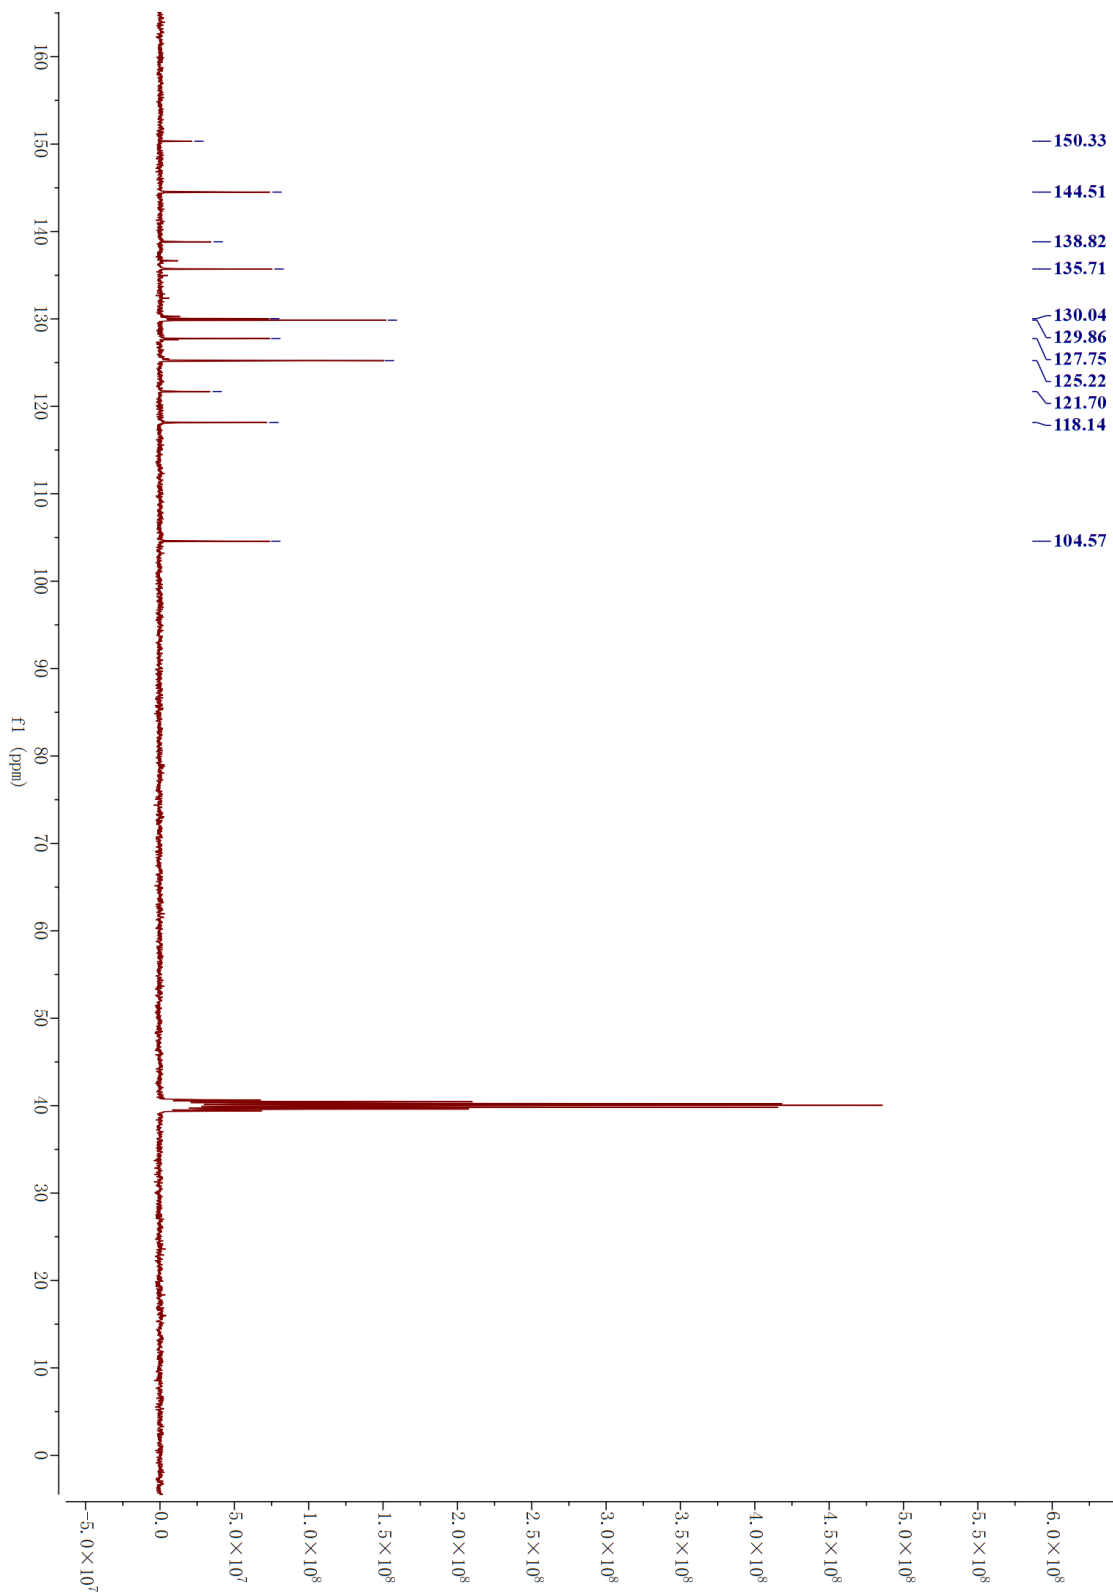

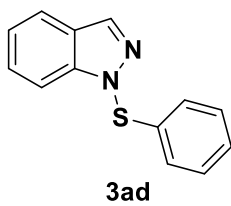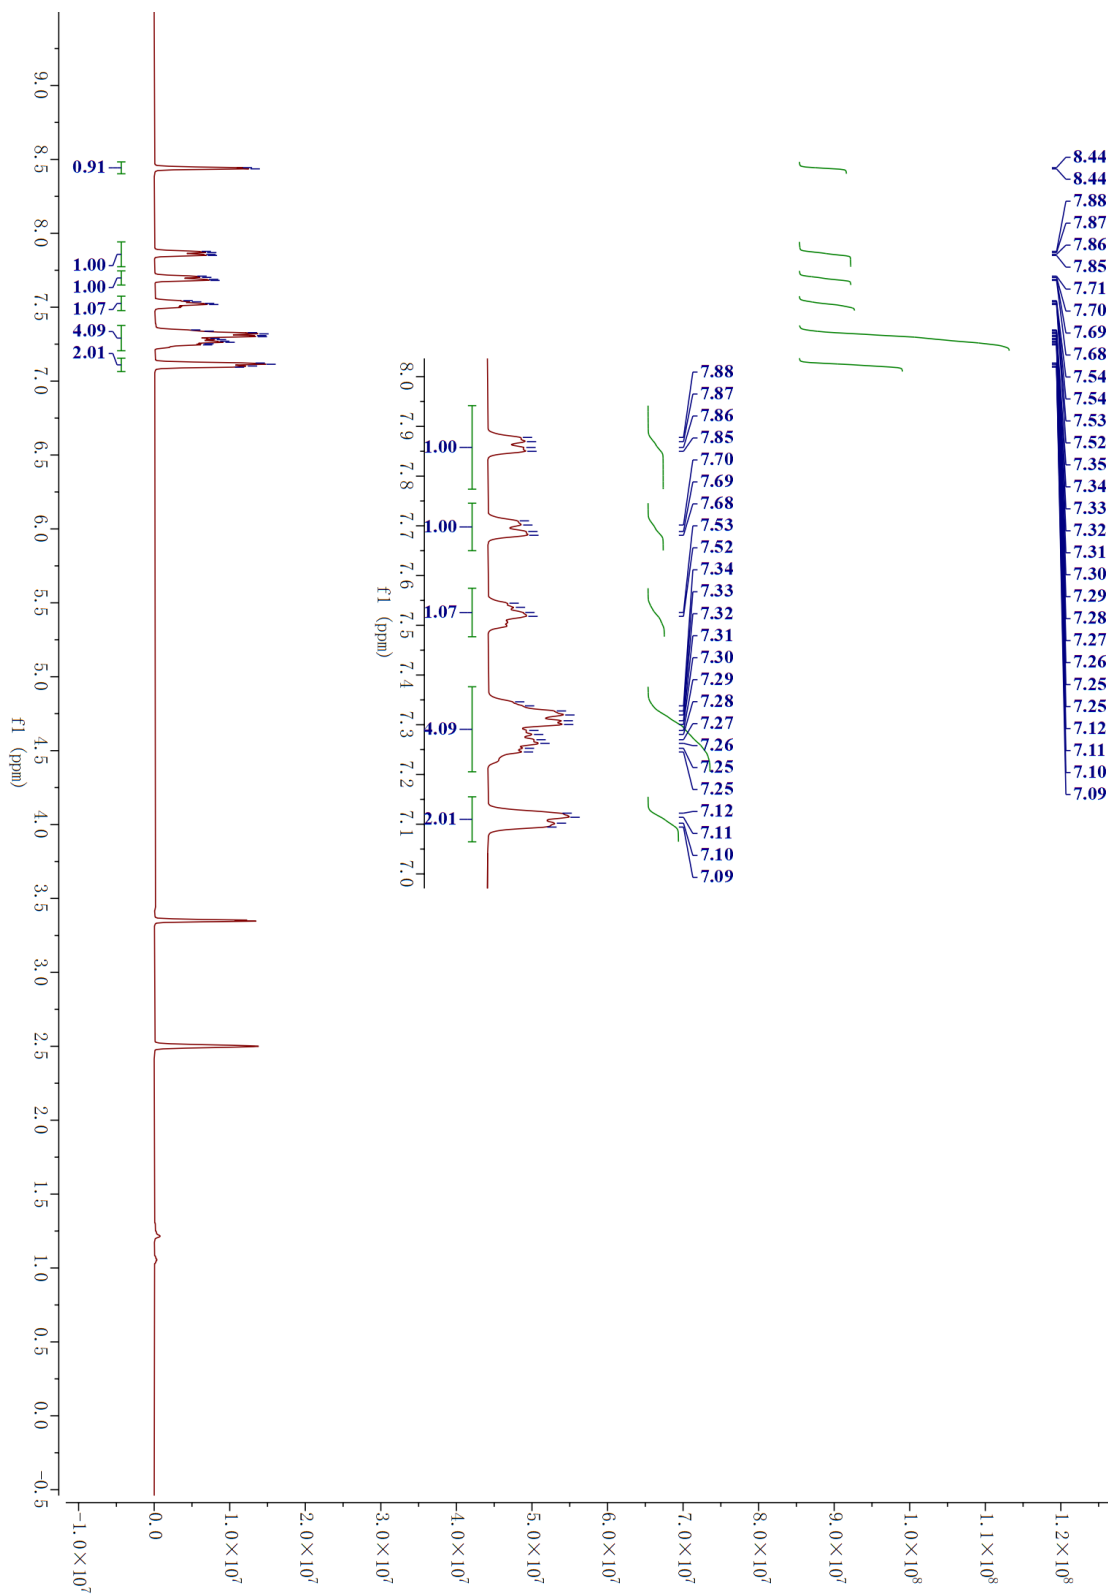

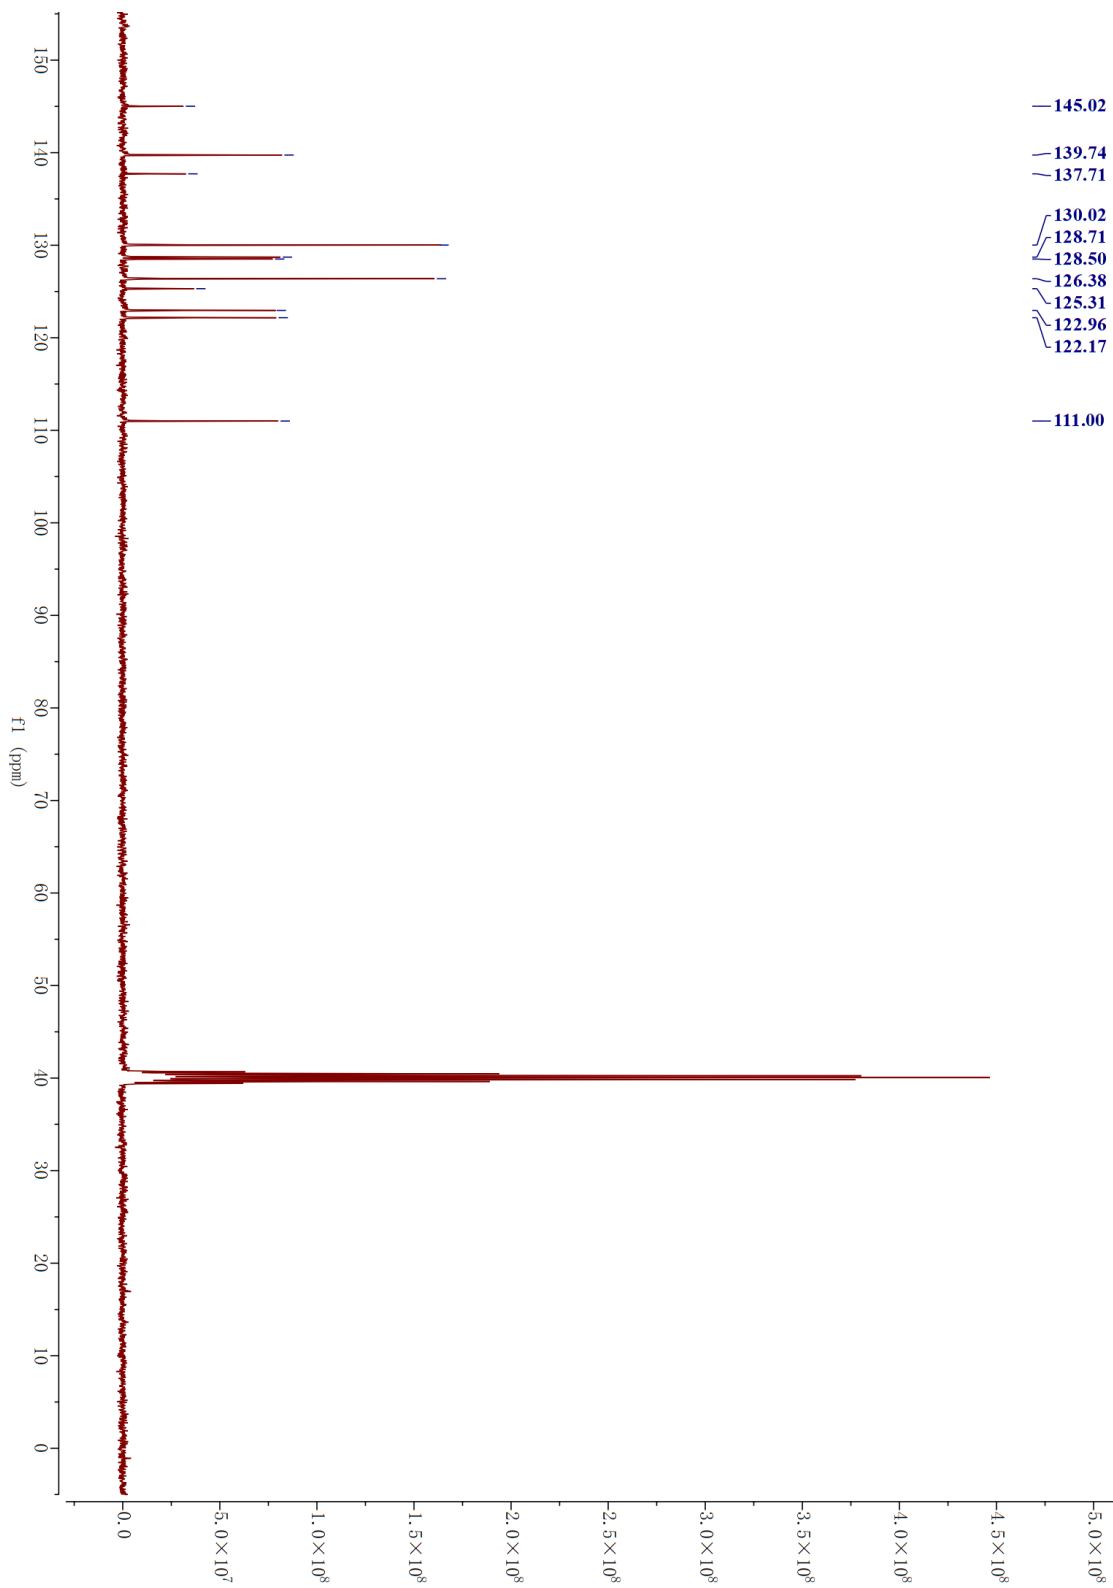

Supplement: d4ob00682h1.pdf [file d4ob00682h1.pdf]
